# Supplementary material for: Fine-Scale Spatial Structure of Soil Microbial Communities in Burrows of a Keystone Rodent Following Mass Mortality
Source: Frontiers journal article supplement (doi:10.3389/fevo.2021.758348), 2021-10-15
Supplement: Data_Sheet_1.docx [file Data_Sheet_1.docx]

Supplementary Material

# Supplementary Methods and Results

Relative abundance of microbial taxa was visualized by grouping each taxon by region of the burrow sampled using QIIME2's feature-table plugin, and abundance was plotted in R. The percent composition of Enterobacteriaceae (the family containing *Y. pestis*) in each burrow region and colony was calculated. Across all samples, the soils were dominated by Actinobacteria and Alphaproteobacteria, with some samples containing a high proportion of Thermoleophilia.

The representativeness of each sample of its inferred burrow region was estimated by obtaining replicate samples from the same region of the same burrow when possible (N=13). We used a paired t-test to determine whether microbial community abundance differed among pairs. Only one replicate pair differed significantly (p < 0.001), suggesting the samples are in fact representative of the burrow region of origin.

# Supplementary Figures and Tables

## Supplementary Figures

##

## Supplementary Figure . Variation in soil abiotic properties among colonies. Upper right: map of study area, where colored polygons represent prairie dog colonies (modified from Sackett et al. 2013).

**Supplementary Figure 2.** Variation in soil abiotic properties among burrow regions.

**Supplementary Figure 3.** Principal Coordinates Analysis plot of phylogenetic diversity among burrow regions. Adjacent – closed yellow circles, bones – green diamonds, dead – purple triangles, entrance – turquoise squares, plague – blue open circles, scat – navy blue stars.

**Supplementary Figure 4.** Relative abundance of microbial families per sample (top) and across burrow regions (bottom).

## Supplementary Tables

**Supplementary Table 1**. Results of model testing Shannon’s diversity as a function of soil properties and spatial location in burrow.

| **Predictor** | **LR Chisq** | **Df** | **Pr(>Chisq)** |
| --- | --- | --- | --- |
| Category | 22.070 | 6 | 0.001176 ** |
| tot_carb | 60.362 | 1 | 7.894e-15 *** |
| tot_nitro | 41.936 | 1 | 9.429e-11 *** |
| carb_nitro_ratio | 74.310 | 1 | < 2.2e-16 *** |
| pH | 6.264 | 1 | 0.012319 * |
| water_content | 25.550 | 1 | 4.312e-07 *** |
| tot_carb: tot_nitro | 17.401 | 1 | 3.027e-05 *** |
| pH:water_content | 8.756 | 1 | 0.003085 ** |

**Supplementary Table 2**. Results of the generalized linear model testing for spatial variation in relative abundance of microbial genera among regions of the burrow (“category”). p-values for all predictors are provided, as are the Benjamini-Yekutieli p-value thresholds. p-values are ranked for ease of interpretation (“rank_p_category”), and taxon number (“taxon_num”) is for internal referencing. The full taxonomy down to genus (if known) is listed.

**Supplementary Table 3**. Ranked and raw p-values of genera whose relative abundance varied significantly among regions of the burrow (“category”). Ranked p-values (“rank_p_category”) are provided for cross-referencing to Supplementary Table 2. The full taxonomy down to genus (if known) is listed.

**Supplementary Table 4**. Results of the generalized linear model testing for spatial variation in relative abundance of microbial families among regions of the burrow (“category”). p-values for all predictors are provided, as are the Benjamini-Yekutieli p-value thresholds. p-values are ranked for ease of interpretation (“rank_p_category”), and taxon number (“taxon_num”) is for internal referencing. The full taxonomy down to family (if known) is listed.

**Supplementary Table 5**. Ranked and raw p-values of families whose relative abundance varied significantly among regions of the burrow (“category”). Ranked p-values (“rank_p_category”) are provided for cross-referencing to Supplementary Table 2. The full taxonomy down to family (if known) is listed.
