# Supplementary material for: Fine-Scale Spatial Structure of Soil Microbial Communities in Burrows of a Keystone Rodent Following Mass Mortality
Source: Frontiers journal article supplement (doi:10.3389/fevo.2021.758348), 2021-10-15
Supplement: Table_1.XLSX [file Table_1.XLSX]

## Sheet: glmAnova_pvalues_genera
rank_p_category	p_category	Benjamini-Yekutieli		p_pH	p_moisture	p_totalC	p_totalN	p_C:N	p_CintN	taxon_num	taxon	these p values were computed by conducting an Anova on a glm for relative abundance of each taxon as a function of burrow region (category), ph, moisture, C, N, C:N
1	1.93246e-25	6.75614e-06	alpha	0.164373	0.326606	0.00518444	0.0123616	0.279841	0.185061	360	k__Bacteria;p__Chloroflexi;c__Chloroflexi;o__AKIW781;f__;g__
2	6.27862e-18	1.35123e-05	0.00668858	0.329146	0.556574	0.724571	0.682294	0.922429	0.117888	984	k__Bacteria;p__[Thermi];c__Deinococci;o__Deinococcales;f__Deinococcaceae;g__Deinococcus
3	5.47413e-16	2.02684e-05		0.36755	0.0512297	0.481958	0.700432	0.849661	0.642121	448	k__Bacteria;p__Firmicutes;c__Bacilli;o__Bacillales;f__Planococcaceae;g__
4	4.50087e-15	2.70246e-05	k	0.87201	0.197408	0.235123	0.155583	0.317408	0.909437	154	k__Bacteria;p__Actinobacteria;c__Actinobacteria;o__Actinomycetales;f__Promicromonosporaceae;g__Cellulosimicrobium
5	1.56162e-12	3.37807e-05	990	0.807161	0.82496	0.00444316	0.00633431	0.0829664	0.450723	428	k__Bacteria;p__FBP;c__;o__;f__;g__
6	1.68957e-10	4.05369e-05		0.526998	0.469773	0.404936	0.800792	0.639933	0.0648781	795	k__Bacteria;p__Proteobacteria;c__Deltaproteobacteria;o__Myxococcales;f__Cystobacteraceae;__
7	1.85826e-09	4.7293e-05		0.0019791	0.00739419	0.312035	0.223554	0.54842	0.11813	546	k__Bacteria;p__Gemmatimonadetes;c__Gemmatimonadetes;__;__;__
8	3.1501e-09	5.40492e-05		0.544863	0.436688	0.437026	0.845768	0.680924	0.0762571	415	k__Bacteria;p__Cyanobacteria;c__Nostocophycideae;o__Nostocales;f__Nostocaceae;g__Nostoc
9	2.50589e-08	6.08053e-05		0.564439	0.607502	0.889415	0.490958	0.369061	0.0453409	420	k__Bacteria;p__Cyanobacteria;c__Oscillatoriophycideae;o__Oscillatoriales;f__Phormidiaceae;g__Phormidium
10	2.91551e-08	6.75614e-05		0.104353	5.40953e-08	0.129817	0.0254264	0.450222	0.59348	544	k__Bacteria;p__Gemmatimonadetes;c__Gemm-4;o__;f__;g__
11	1.99019e-07	7.43176e-05		0.00399524	0.323511	0.830442	0.321253	0.601783	0.621106	690	k__Bacteria;p__Proteobacteria;c__Alphaproteobacteria;o__Rhodospirillales;f__Acetobacteraceae;g__Roseomonas
12	3.09308e-07	8.10737e-05		0.387979	0.870614	5.60122e-06	5.86848e-06	0.0287467	0.587317	673	k__Bacteria;p__Proteobacteria;c__Alphaproteobacteria;o__Rhizobiales;f__Rhodobiaceae;g__Afifella
13	3.97044e-07	8.78299e-05		0.180291	0.231738	6.49686e-05	5.08036e-05	0.00274089	0.824181	100	k__Bacteria;p__Actinobacteria;c__Actinobacteria;o__Actinomycetales;f__Geodermatophilaceae;g__Geodermatophilus
14	8.02636e-07	9.4586e-05		0.0483368	0.887444	0.722919	0.596658	0.212624	0.304488	543	k__Bacteria;p__Gemmatimonadetes;c__Gemm-3;o__;f__;g__
15	8.61555e-07	0.000101342		0.328986	0.377678	0.0010189	0.000139959	0.0473277	0.179499	166	k__Bacteria;p__Actinobacteria;c__Actinobacteria;o__Actinomycetales;f__Sporichthyaceae;g__
16	1.06909e-06	0.000108098		0.0368372	1.85158e-07	0.0253695	0.0014935	0.160268	0.646456	910	k__Bacteria;p__Proteobacteria;c__Gammaproteobacteria;o__[Marinicellales];f__[Marinicellaceae];g__
17	1.11703e-06	0.000114854		0.0190311	0.864242	0.447762	0.179947	0.544776	0.640941	664	k__Bacteria;p__Proteobacteria;c__Alphaproteobacteria;o__Rhizobiales;f__Rhizobiaceae;__
18	1.60023e-06	0.000121611		0.272614	0.290416	0.000295639	0.000199501	0.00149461	0.719782	101	k__Bacteria;p__Actinobacteria;c__Actinobacteria;o__Actinomycetales;f__Geodermatophilaceae;g__Modestobacter
19	1.63152e-06	0.000128367		0.30101	1.59042e-06	0.884066	0.973377	0.388762	0.517033	61	k__Bacteria;p__Actinobacteria;c__Acidimicrobiia;o__Acidimicrobiales;f__;g__
20	2.16056e-06	0.000135123		0.332555	0.677076	0.425862	0.334788	0.140624	0.194361	772	k__Bacteria;p__Proteobacteria;c__Betaproteobacteria;o__SC-I-84;f__;g__
21	2.60452e-06	0.000141879		0.0785157	0.164244	0.112347	0.0252356	0.472597	0.681619	636	k__Bacteria;p__Proteobacteria;c__Alphaproteobacteria;o__Rhizobiales;f__Bradyrhizobiaceae;g__
22	3.17639e-06	0.000148635		0.703447	1.26793e-06	0.555849	0.532279	0.779875	0.05281	769	k__Bacteria;p__Proteobacteria;c__Betaproteobacteria;o__Rhodocyclales;f__Rhodocyclaceae;g__Azoarcus
23	4.92918e-06	0.000155391		0.0204658	0.178754	0.0740273	0.55739	0.111685	0.0792866	194	k__Bacteria;p__Actinobacteria;c__Rubrobacteria;o__Rubrobacterales;f__Rubrobacteraceae;g__Rubrobacter
24	6.00385e-06	0.000162147		0.000530787	0.328796	0.000115384	0.00160909	0.00286716	0.0503972	681	k__Bacteria;p__Proteobacteria;c__Alphaproteobacteria;o__Rhodobacterales;f__Rhodobacteraceae;g__Paracoccus
25	6.11383e-06	0.000168904		0.794212	0.949869	0.0225394	0.0373582	0.00760465	0.905921	150	k__Bacteria;p__Actinobacteria;c__Actinobacteria;o__Actinomycetales;f__Nocardioidaceae;g__Pimelobacter
26	8.84082e-06	0.00017566		0.40225	0.576811	0.00137042	0.00234334	0.00510177	0.883296	634	k__Bacteria;p__Proteobacteria;c__Alphaproteobacteria;o__Rhizobiales;f__Beijerinckiaceae;g__
27	1.57069e-05	0.000182416		0.630819	0.551286	0.542325	0.871758	0.73236	0.15986	403	k__Bacteria;p__Cyanobacteria;c__;o__;f__;g__
28	1.60907e-05	0.000189172		0.828059	0.0582895	0.356972	0.818583	0.359925	0.192682	256	k__Bacteria;p__Bacteroidetes;c__Cytophagia;o__Cytophagales;f__Cytophagaceae;g__Pontibacter
29	1.7171e-05	0.000195928		1.03254e-05	0.244729	0.000139763	0.00385588	4.40474e-07	0.0111122	104	k__Bacteria;p__Actinobacteria;c__Actinobacteria;o__Actinomycetales;f__Intrasporangiaceae;__
30	1.77997e-05	0.000202684		0.432374	1.09583e-06	0.790213	0.947072	0.773569	0.936741	545	k__Bacteria;p__Gemmatimonadetes;c__Gemm-5;o__;f__;g__
31	1.83481e-05	0.00020944		0.223764	0.429308	0.549906	0.962063	0.365761	0.103446	37	k__Bacteria;p__Acidobacteria;c__BPC102;o__MVS-40;f__;g__
32	2.0682e-05	0.000216197		0.0372731	0.21962	0.112945	0.0472818	0.196256	0.274298	550	k__Bacteria;p__Gemmatimonadetes;c__Gemmatimonadetes;o__Gemmatimonadales;f__;g__
33	2.21297e-05	0.000222953		0.113693	2.73781e-06	0.0809375	0.0308109	0.2816	0.314881	632	k__Bacteria;p__Proteobacteria;c__Alphaproteobacteria;o__Rhizobiales;f__;g__
34	2.70446e-05	0.000229709		0.38797	1.66404e-06	0.0910458	0.0713591	0.79271	0.668021	617	k__Bacteria;p__Proteobacteria;c__Alphaproteobacteria;__;__;__
35	2.77149e-05	0.000236465		0.689756	0.370656	0.928163	0.664476	0.617146	0.852448	373	k__Bacteria;p__Chloroflexi;c__Chloroflexi;o__[Roseiflexales];f__[Kouleothrixaceae];g__Kouleothrix
36	3.0771e-05	0.000243221		0.366787	0.884186	0.0713255	0.0302789	0.0545648	0.197759	44	k__Bacteria;p__Acidobacteria;c__Solibacteres;o__Solibacterales;f__;g__
37	4.0045e-05	0.000249977		0.623064	0.577338	0.532254	0.840344	0.75631	0.17167	419	k__Bacteria;p__Cyanobacteria;c__Oscillatoriophycideae;o__Oscillatoriales;f__Phormidiaceae;g__Microcoleus
38	4.0045e-05	0.000256733		0.623064	0.577338	0.532254	0.840344	0.75631	0.17167	746	k__Bacteria;p__Proteobacteria;c__Betaproteobacteria;o__Burkholderiales;f__Comamonadaceae;g__Rhodoferax
39	4.0045e-05	0.00026349		0.623064	0.577338	0.532254	0.840344	0.75631	0.17167	760	k__Bacteria;p__Proteobacteria;c__Betaproteobacteria;o__Methylophilales;f__;g__
40	4.0045e-05	0.000270246		0.623064	0.577338	0.532254	0.840344	0.75631	0.17167	416	k__Bacteria;p__Cyanobacteria;c__Nostocophycideae;o__Nostocales;f__Scytonemataceae;g__
41	4.0045e-05	0.000277002		0.623064	0.577338	0.532254	0.840344	0.75631	0.17167	418	k__Bacteria;p__Cyanobacteria;c__Oscillatoriophycideae;o__Oscillatoriales;f__Phormidiaceae;__
42	5.83075e-05	0.000283758		0.855999	0.917457	0.303164	0.105114	0.416058	0.428811	570	k__Bacteria;p__OP11;c__;o__;f__;g__
43	7.52061e-05	0.000290514		0.689907	0.814392	0.000883303	0.00343661	0.114074	0.22965	605	k__Bacteria;p__Planctomycetes;c__Planctomycetia;o__Gemmatales;f__Isosphaeraceae;g__
44	7.54727e-05	0.00029727		0.311744	0.832966	2.96235e-09	6.29264e-09	1.89682e-07	0.238403	127	k__Bacteria;p__Actinobacteria;c__Actinobacteria;o__Actinomycetales;f__Micromonosporaceae;g__
45	7.69083e-05	0.000304026		0.541312	0.978994	0.339632	0.551689	0.430801	0.983568	311	k__Bacteria;p__Bacteroidetes;c__[Saprospirae];o__[Saprospirales];f__Chitinophagaceae;g__Niabella
46	7.99869e-05	0.000310783		0.0119265	3.42475e-06	0.0503383	0.0145148	0.582796	0.999518	301	k__Bacteria;p__Bacteroidetes;c__[Rhodothermi];o__[Rhodothermales];f__Rhodothermaceae;g__
47	8.46447e-05	0.000317539		0.245912	0.359154	0.000126837	0.000854928	0.0046229	0.713555	388	k__Bacteria;p__Chloroflexi;c__TK10;o__B07_WMSP1;__;__
48	8.63052e-05	0.000324295		0.695644	6.87825e-05	0.661274	0.729792	0.64753	0.314814	46	k__Bacteria;p__Acidobacteria;c__Solibacteres;o__Solibacterales;f__PAUC26f;g__
49	8.84824e-05	0.000331051		0.0340032	2.16507e-05	0.0854674	0.00483042	0.167164	0.548176	851	k__Bacteria;p__Proteobacteria;c__Gammaproteobacteria;o__Chromatiales;f__Ectothiorhodospiraceae;g__
50	0.00010022	0.000337807		0.117347	0.00880006	0.151625	0.371046	0.999387	0.295837	51	k__Bacteria;p__Acidobacteria;c__Sva0725;o__Sva0725;f__;g__
51	0.000100459	0.000344563		0.63425	2.59525e-05	0.52635	0.493098	0.858999	0.139276	345	k__Bacteria;p__Chloroflexi;c__Anaerolineae;o__DRC31;f__;g__
52	0.000109808	0.000351319		0.000250393	0.804565	0.0150599	0.00505473	0.017337	0.0329319	594	k__Bacteria;p__Planctomycetes;c__Phycisphaerae;o__WD2101;f__;g__
53	0.000111535	0.000358076		0.0129036	0.583629	0.221181	0.140471	0.658692	0.43949	637	k__Bacteria;p__Proteobacteria;c__Alphaproteobacteria;o__Rhizobiales;f__Bradyrhizobiaceae;g__Balneimonas
54	0.000130816	0.000364832		0.0934024	1.33805e-05	0.175194	0.023612	0.300397	0.55872	756	k__Bacteria;p__Proteobacteria;c__Betaproteobacteria;o__Hydrogenophilales;f__Hydrogenophilaceae;g__Thiobacillus
55	0.00013267	0.000371588		0.94235	1.21324e-05	0.499107	0.395096	0.789563	0.0213436	863	k__Bacteria;p__Proteobacteria;c__Gammaproteobacteria;o__HTCC2188;f__HTCC2089;g__
56	0.000150131	0.000378344		0.680629	0.387515	0.532947	0.849494	0.738599	0.250319	408	k__Bacteria;p__Cyanobacteria;c__Chloroplast;o__Chlorophyta;f__Chlamydomonadaceae;g__
57	0.000150715	0.0003851		2.19128e-07	0.376751	0.234852	0.0903484	0.600034	0.540147	394	k__Bacteria;p__Chloroflexi;c__Thermomicrobia;o__;f__;g__
58	0.00017748	0.000391856		0.269755	0.137742	0.892963	0.365001	0.581996	0.93086	755	k__Bacteria;p__Proteobacteria;c__Betaproteobacteria;o__Ellin6067;f__;g__
59	0.000189611	0.000398612		0.524334	0.127881	3.56118e-16	2.26048e-13	4.30852e-11	0.637892	136	k__Bacteria;p__Actinobacteria;c__Actinobacteria;o__Actinomycetales;f__Micromonosporaceae;g__Virgisporangium
60	0.000210467	0.000405369		0.0901156	0.132503	0.494384	0.498726	0.414468	0.081749	173	k__Bacteria;p__Actinobacteria;c__Actinobacteria;o__Actinomycetales;f__Streptosporangiaceae;g__Sphaerisporangium
61	0.000225875	0.000412125		0.0309412	2.15227e-05	0.0395127	0.00171761	0.120209	0.31072	914	k__Bacteria;p__SBR1093;c__VHS-B5-50;o__;f__;g__
62	0.000279651	0.000418881		0.0164541	0.00150835	0.527856	0.619745	0.367274	0.310074	299	k__Bacteria;p__Bacteroidetes;c__Sphingobacteriia;o__Sphingobacteriales;f__Sphingobacteriaceae;g__Sphingobacterium
63	0.000291819	0.000425637		0.785376	0.00329103	0.478932	0.705697	0.494661	0.000165747	452	k__Bacteria;p__Firmicutes;c__Bacilli;o__Bacillales;f__Planococcaceae;g__Planomicrobium
64	0.000320386	0.000432393		0.590123	0.454616	0.964701	0.761037	0.685438	0.710553	579	k__Bacteria;p__Planctomycetes;c__BD7-11;o__;f__;g__
65	0.000324272	0.000439149		0.819506	5.39057e-05	0.243657	0.435006	0.758078	0.224238	542	k__Bacteria;p__Gemmatimonadetes;c__Gemm-2;o__;f__;g__
66	0.000357119	0.000445905		3.67573e-05	0.662767	0.113129	0.0171179	0.147824	0.254112	137	k__Bacteria;p__Actinobacteria;c__Actinobacteria;o__Actinomycetales;f__Mycobacteriaceae;g__Mycobacterium
67	0.000375989	0.000452662		0.0168988	0.232396	0.247316	0.057514	0.0720656	0.328391	603	k__Bacteria;p__Planctomycetes;c__Planctomycetia;o__Gemmatales;f__Gemmataceae;g__Gemmata
68	0.000381902	0.000459418		0.102436	0.0477811	0.957314	0.509267	0.791388	0.332757	279	k__Bacteria;p__Bacteroidetes;c__Flavobacteriia;o__Flavobacteriales;f__Flavobacteriaceae;g__Flavobacterium
69	0.000408007	0.000466174		0.853733	0.692527	0.00359864	0.00623412	0.0532408	0.939812	333	k__Bacteria;p__Chloroflexi;c__;o__;f__;g__
70	0.000409536	0.00047293		0.166116	0.0737227	0.781463	0.413661	0.757292	0.593201	725	k__Bacteria;p__Proteobacteria;c__Alphaproteobacteria;o__Sphingomonadales;f__Sphingomonadaceae;g__Sphingopyxis
71	0.000432943	0.000479686		0.077187	0.317366	7.04524e-06	4.27009e-07	0.000595034	0.114648	98	k__Bacteria;p__Actinobacteria;c__Actinobacteria;o__Actinomycetales;f__Geodermatophilaceae;g__
72	0.000444907	0.000486442		0.039232	0.675533	3.37779e-06	3.62296e-05	0.00115705	0.646166	370	k__Bacteria;p__Chloroflexi;c__Chloroflexi;o__[Roseiflexales];f__;g__
73	0.000449821	0.000493199		0.767567	0.545894	0.994792	0.356762	0.838275	0.432414	347	k__Bacteria;p__Chloroflexi;c__Anaerolineae;o__H39;f__;g__
74	0.000473968	0.000499955		0.00339583	0.88847	0.0249945	0.0154762	0.0151206	0.213243	27	k__Bacteria;p__Acidobacteria;c__Acidobacteria-6;o__iii1-15;f__;g__
75	0.000487189	0.000506711		0.704176	0.35663	0.0144465	0.00230951	0.0189239	0.0169007	295	k__Bacteria;p__Bacteroidetes;c__Sphingobacteriia;o__Sphingobacteriales;f__Sphingobacteriaceae;g__
76	0.000503931	0.000513467		0.663487	2.94641e-05	0.0753121	0.0913313	0.50618	0.34277	105	k__Bacteria;p__Actinobacteria;c__Actinobacteria;o__Actinomycetales;f__Intrasporangiaceae;g__
77	0.000533263	0.000520223		0.0480638	2.43332e-05	0.0948874	0.0057277	0.13981	0.659051	807	k__Bacteria;p__Proteobacteria;c__Deltaproteobacteria;o__Myxococcales;f__Nannocystaceae;g__Plesiocystis
78	0.000576389	0.000526979		0.149609	0.912431	0.0362176	0.0349003	0.0959118	0.698331	259	k__Bacteria;p__Bacteroidetes;c__Cytophagia;o__Cytophagales;f__Cytophagaceae;g__Spirosoma
79	0.000594919	0.000533735		0.150794	1.609e-05	0.119792	0.0161364	0.228932	0.351745	788	k__Bacteria;p__Proteobacteria;c__Deltaproteobacteria;o__Desulfuromonadales;f__Pelobacteraceae;g__
80	0.000612956	0.000540492		0.335845	3.15112e-06	0.887595	0.523662	0.799766	0.696825	540	k__Bacteria;p__Gemmatimonadetes;c__;o__;f__;g__
81	0.000774456	0.000547248		0.88368	0.32425	0.00358618	0.00170163	1.34943e-05	0.438139	156	k__Bacteria;p__Actinobacteria;c__Actinobacteria;o__Actinomycetales;f__Promicromonosporaceae;g__Xylanimicrobium
82	0.000880909	0.000554004		0.291224	0.636841	0.379723	0.520114	0.868931	0.128266	982	k__Bacteria;p__[Thermi];c__Deinococci;o__Deinococcales;f__Deinococcaceae;__
83	0.000911255	0.00056076		0.519795	0.793398	0.409456	0.753065	0.728185	0.511895	718	k__Bacteria;p__Proteobacteria;c__Alphaproteobacteria;o__Sphingomonadales;f__Erythrobacteraceae;g__Lutibacterium
84	0.000960105	0.000567516		0.0371572	3.57277e-05	0.0847726	0.00350523	0.119989	0.998391	948	k__Bacteria;p__Verrucomicrobia;c__Verruco-5;o__LD1-PB3;f__LD1-PA34;g__
85	0.00102283	0.000574272		0.467729	0.000565187	0.140565	0.0750711	0.715332	0.818256	890	k__Bacteria;p__Proteobacteria;c__Gammaproteobacteria;o__Thiotrichales;f__Piscirickettsiaceae;g__
86	0.00122392	0.000581028		0.0351977	0.153142	0.0345969	0.128603	0.0099447	0.577919	686	k__Bacteria;p__Proteobacteria;c__Alphaproteobacteria;o__Rhodospirillales;f__;g__
87	0.0012337	0.000587785		0.891018	0.202419	0.00251738	0.0489068	0.0014931	0.0169883	900	k__Bacteria;p__Proteobacteria;c__Gammaproteobacteria;o__Xanthomonadales;f__Xanthomonadaceae;g__Dokdonella
88	0.00124786	0.000594541		0.0263489	0.105331	2.73365e-05	0.000126873	0.000430319	0.609412	109	k__Bacteria;p__Actinobacteria;c__Actinobacteria;o__Actinomycetales;f__Kineosporiaceae;g__
89	0.0012958	0.000601297		0.000640492	0.00687955	3.33881e-07	5.37558e-10	6.32833e-07	0.139473	829	k__Bacteria;p__Proteobacteria;c__Gammaproteobacteria;o__Alteromonadales;f__211ds20;g__
90	0.00138092	0.000608053		0.0319028	0.269192	0.107029	0.0617236	0.092452	0.474996	688	k__Bacteria;p__Proteobacteria;c__Alphaproteobacteria;o__Rhodospirillales;f__Acetobacteraceae;g__
91	0.00145084	0.000614809		5.30657e-05	1.94716e-06	0.000131297	1.5492e-06	0.0135947	0.0300174	612	k__Bacteria;p__Planctomycetes;c__Planctomycetia;o__Planctomycetales;f__Planctomycetaceae;g__Planctomyces
92	0.0014692	0.000621565		0.34169	0.0138985	0.5304	0.416094	0.169464	0.916834	22	k__Bacteria;p__Acidobacteria;c__Acidobacteria-5;o__;f__;g__
93	0.00165725	0.000628321		0.282462	0.0505987	0.0108154	0.00194892	0.0731644	0.193674	658	k__Bacteria;p__Proteobacteria;c__Alphaproteobacteria;o__Rhizobiales;f__Phyllobacteriaceae;__
94	0.00170271	0.000635078		0.994578	0.136338	0.0959084	0.111496	0.0820703	0.897669	740	k__Bacteria;p__Proteobacteria;c__Betaproteobacteria;o__Burkholderiales;f__Comamonadaceae;g__
95	0.00182484	0.000641834		0.757595	5.82258e-10	0.039264	0.49417	0.0060035	3.48431e-05	121	k__Bacteria;p__Actinobacteria;c__Actinobacteria;o__Actinomycetales;f__Micrococcaceae;g__
96	0.00189091	0.00064859		4.79097e-07	0.341185	0.303767	0.168514	0.976855	0.68438	313	k__Bacteria;p__Bacteroidetes;c__[Saprospirae];o__[Saprospirales];f__Chitinophagaceae;g__Segetibacter
97	0.00190929	0.000655346		0.0142447	0.169323	0.259589	0.0832817	0.359886	0.264339	97	k__Bacteria;p__Actinobacteria;c__Actinobacteria;o__Actinomycetales;f__Geodermatophilaceae;__
98	0.00191303	0.000662102		0.374509	0.348774	0.394461	0.697912	0.887344	0.196385	919	k__Bacteria;p__TM6;c__SBRH58;o__;f__;g__
99	0.00192515	0.000668858		0.752243	0.548175	0.67304	0.989535	0.782441	0.265083	399	k__Bacteria;p__Cyanobacteria;__;__;__;__
100	0.00197009	0.000675614		0.311212	3.03756e-09	0.474799	0.447908	0.25731	2.62971e-05	120	k__Bacteria;p__Actinobacteria;c__Actinobacteria;o__Actinomycetales;f__Micrococcaceae;__
101	0.00209095	0.000682371		0.206839	0.154732	0.919383	0.41624	0.687378	0.523972	8	k__Archaea;p__Euryarchaeota;c__Methanobacteria;o__Methanobacteriales;f__Methanobacteriaceae;g__Methanosphaera
102	0.00216908	0.000689127		0.212772	0.490676	0.112365	0.202801	0.417214	0.616088	378	k__Bacteria;p__Chloroflexi;c__Ktedonobacteria;o__TK10;f__;g__
103	0.00237864	0.000695883		0.0147368	0.848813	0.36912	0.388726	0.296899	0.987169	316	k__Bacteria;p__Chlamydiae;c__Chlamydiia;o__Chlamydiales;__;__
104	0.00245914	0.000702639		0.00556086	0.302105	0.85979	0.762304	0.812253	0.961196	298	k__Bacteria;p__Bacteroidetes;c__Sphingobacteriia;o__Sphingobacteriales;f__Sphingobacteriaceae;g__Pedobacter
105	0.00261214	0.000709395		0.656603	0.920054	0.810941	0.762189	0.62411	0.837807	76	k__Bacteria;p__Actinobacteria;c__Actinobacteria;o__Actinomycetales;f__Actinomycetaceae;g__Candidatus Ancillula
106	0.00277232	0.000716151		0.0643266	0.000108083	0.109155	0.00778637	0.160956	0.968498	782	k__Bacteria;p__Proteobacteria;c__Deltaproteobacteria;o__Desulfobacterales;f__Desulfobulbaceae;g__
107	0.00280421	0.000722907		0.00772369	1.47711e-06	2.37667e-05	7.89424e-09	0.00341742	0.26001	837	k__Bacteria;p__Proteobacteria;c__Gammaproteobacteria;o__Alteromonadales;f__Alteromonadaceae;g__Marinobacter
108	0.00281427	0.000729664		0.88663	0.0840482	0.834107	0.580626	0.878937	0.537134	376	k__Bacteria;p__Chloroflexi;c__Ktedonobacteria;o__;f__;g__
109	0.00287959	0.00073642		0.268081	0.33623	0.000879184	0.000569578	0.00126595	0.774961	602	k__Bacteria;p__Planctomycetes;c__Planctomycetia;o__Gemmatales;f__Gemmataceae;g__
110	0.00301653	0.000743176		0.0228438	0.215859	0.516657	0.429682	0.0109617	0.967747	144	k__Bacteria;p__Actinobacteria;c__Actinobacteria;o__Actinomycetales;f__Nocardioidaceae;g__
111	0.00309508	0.000749932		0.0265754	0.0014071	0.109355	0.0116147	0.0877009	0.882575	85	k__Bacteria;p__Actinobacteria;c__Actinobacteria;o__Actinomycetales;f__Cellulomonadaceae;g__Actinotalea
112	0.00314154	0.000756688		0.750827	0.68455	0.0108319	0.0118692	0.0342833	0.223779	348	k__Bacteria;p__Chloroflexi;c__Anaerolineae;o__S0208;f__;g__
113	0.00319931	0.000763444		0.0715152	0.00119415	0.0141423	0.000492798	0.128603	0.525593	832	k__Bacteria;p__Proteobacteria;c__Gammaproteobacteria;o__Alteromonadales;f__Alteromonadaceae;g__
114	0.00319949	0.0007702		0.895214	0.066778	0.913665	0.781294	0.981122	0.440408	445	k__Bacteria;p__Firmicutes;c__Bacilli;o__Bacillales;f__Paenibacillaceae;g__Cohnella
115	0.00324258	0.000776957		0.128451	0.369824	0.00150313	0.00027612	1.93827e-07	0.41914	155	k__Bacteria;p__Actinobacteria;c__Actinobacteria;o__Actinomycetales;f__Promicromonosporaceae;g__Promicromonospora
116	0.00334198	0.000783713		0.19182	0.411257	0.12652	0.262397	0.00645771	0.216699	310	k__Bacteria;p__Bacteroidetes;c__[Saprospirae];o__[Saprospirales];f__Chitinophagaceae;g__Flavisolibacter
117	0.00343067	0.000790469		0.0129098	0.0148647	0.701477	0.551913	0.90089	0.719873	958	k__Bacteria;p__Verrucomicrobia;c__[Pedosphaerae];o__[Pedosphaerales];f__;g__
118	0.0034866	0.000797225		0.00192589	0.506646	0.738102	0.780027	0.598969	0.822285	350	k__Bacteria;p__Chloroflexi;c__Anaerolineae;o__SBR1031;f__A4b;g__
119	0.0037061	0.000803981		0.741366	0.298933	0.975069	0.874789	0.809416	0.546077	35	k__Bacteria;p__Acidobacteria;c__BPC102;o__;f__;g__
120	0.0037061	0.000810737		0.741366	0.298933	0.975069	0.874789	0.809416	0.546077	423	k__Bacteria;p__Elusimicrobia;c__Elusimicrobia;__;__;__
121	0.0037061	0.000817493		0.741366	0.298933	0.975069	0.874789	0.809416	0.546077	405	k__Bacteria;p__Cyanobacteria;c__Chloroplast;o__;f__;g__
122	0.00374904	0.00082425		0.643118	0.712533	0.0011359	0.000835968	0.00655832	0.461207	361	k__Bacteria;p__Chloroflexi;c__Chloroflexi;o__Chloroflexales;__;__
123	0.00378408	0.000831006		0.720296	0.424262	0.542813	0.566388	0.512398	0.304078	697	k__Bacteria;p__Proteobacteria;c__Alphaproteobacteria;o__Rhodospirillales;f__Rhodospirillaceae;g__Phaeospirillum
124	0.00388967	0.000837762		0.741974	0.378879	0.00794849	0.0185684	0.0244942	0.346966	358	k__Bacteria;p__Chloroflexi;c__C0119;o__;f__;g__
125	0.00399316	0.000844518		0.823509	0.817233	0.00184198	0.000359977	3.62008e-06	0.214689	158	k__Bacteria;p__Actinobacteria;c__Actinobacteria;o__Actinomycetales;f__Pseudonocardiaceae;__
126	0.00406092	0.000851274		0.957566	0.192998	0.944571	0.921095	0.996431	0.756965	66	k__Bacteria;p__Actinobacteria;c__Acidimicrobiia;o__Acidimicrobiales;f__Iamiaceae;g__
127	0.00406092	0.00085803		0.957566	0.192998	0.944571	0.921095	0.996431	0.756965	813	k__Bacteria;p__Proteobacteria;c__Deltaproteobacteria;o__NB1-j;f__;g__
128	0.00406092	0.000864786		0.957566	0.192998	0.944571	0.921095	0.996431	0.756965	981	k__Bacteria;p__ZB3;c__;o__;f__;g__
129	0.00406092	0.000871543		0.957566	0.192998	0.944571	0.921095	0.996431	0.756965	255	k__Bacteria;p__Bacteroidetes;c__Cytophagia;o__Cytophagales;f__Cytophagaceae;g__Larkinella
130	0.00407126	0.000878299		0.000968019	0.0486946	0.622455	0.758716	0.305861	0.019516	822	k__Bacteria;p__Proteobacteria;c__Deltaproteobacteria;o__[Entotheonellales];f__[Entotheonellaceae];g__Candidatus Entotheonella
131	0.00432829	0.000885055		0.840236	0.00945855	0.755494	0.439415	0.277055	0.483714	815	k__Bacteria;p__Proteobacteria;c__Deltaproteobacteria;o__NB1-j;f__NB1-i;g__
132	0.00436069	0.000891811		0.875411	0.514279	0.128396	0.173675	0.108535	0.522619	180	k__Bacteria;p__Actinobacteria;c__Actinobacteria;o__Actinomycetales;f__Williamsiaceae;g__Williamsia
133	0.00444551	0.000898567		0.309092	0.544138	0.0673081	0.366234	0.461537	0.708565	726	k__Bacteria;p__Proteobacteria;c__Betaproteobacteria;__;__;__
134	0.0045145	0.000905323		0.0197534	0.474489	0.332253	0.312401	0.392999	0.0160961	699	k__Bacteria;p__Proteobacteria;c__Alphaproteobacteria;o__Rhodospirillales;f__Rhodospirillaceae;g__Skermanella
135	0.00454518	0.000912079		0.0209179	0.381166	0.00400868	0.00215061	0.00653592	0.840784	972	k__Bacteria;p__Verrucomicrobia;c__[Spartobacteria];o__[Chthoniobacterales];f__[Chthoniobacteraceae];g__OR-59
136	0.00459681	0.000918836		0.450557	0.00221453	0.0243844	0.0277869	0.223039	0.0146345	280	k__Bacteria;p__Bacteroidetes;c__Flavobacteriia;o__Flavobacteriales;f__Flavobacteriaceae;g__Gelidibacter
137	0.00489929	0.000925592		0.00120872	0.408655	0.323929	0.164736	0.130298	0.0458318	29	k__Bacteria;p__Acidobacteria;c__Acidobacteria-6;o__iii1-15;f__mb2424;g__
138	0.00492019	0.000932348		0.0344367	8.39773e-05	0.0991125	0.00490669	0.156722	0.990749	826	k__Bacteria;p__Proteobacteria;c__Gammaproteobacteria;o__;f__;g__
139	0.0049344	0.000939104		0.00896297	0.0816389	0.80176	0.829434	0.367607	0.0219991	565	k__Bacteria;p__Nitrospirae;c__Nitrospira;o__Nitrospirales;f__Nitrospiraceae;g__Nitrospira
140	0.0052496	0.00094586		0.541599	0.440133	0.985522	0.830273	0.958942	0.537902	459	k__Bacteria;p__Firmicutes;c__Bacilli;o__Bacillales;f__Thermoactinomycetaceae;g__Planifilum
141	0.00542506	0.000952616		0.398658	0.197545	0.684265	0.219732	0.863572	0.487866	124	k__Bacteria;p__Actinobacteria;c__Actinobacteria;o__Actinomycetales;f__Micrococcaceae;g__Microbispora
142	0.00553655	0.000959372		0.682906	0.285586	0.296126	0.192826	0.118729	0.380193	302	k__Bacteria;p__Bacteroidetes;c__[Rhodothermi];o__[Rhodothermales];f__Rhodothermaceae;g__Rubricoccus
143	0.00566613	0.000966129		0.830528	0.195689	0.000222995	0.00145616	0.00110669	0.804144	60	k__Bacteria;p__Actinobacteria;c__Acidimicrobiia;o__Acidimicrobiales;__;__
144	0.00586793	0.000972885		0.000380428	0.672566	0.0132234	0.00878759	0.016948	0.274143	56	k__Bacteria;p__Acidobacteria;c__[Chloracidobacteria];o__RB41;f__Ellin6075;g__
145	0.00591315	0.000979641		0.115923	0.001153	0.369426	0.123333	0.780487	0.0614998	344	k__Bacteria;p__Chloroflexi;c__Anaerolineae;o__Caldilineales;f__Caldilineaceae;g__Caldilinea
146	0.00602609	0.000986397		0.426949	0.290337	0.00721815	0.0269097	0.0961996	0.639817	382	k__Bacteria;p__Chloroflexi;c__SHA-26;o__;f__;g__
147	0.00606093	0.000993153		0.0236159	0.0186731	0.0138812	0.0083123	0.253707	0.264482	724	k__Bacteria;p__Proteobacteria;c__Alphaproteobacteria;o__Sphingomonadales;f__Sphingomonadaceae;g__Sphingomonas
148	0.00614226	0.000999909		0.17549	0.842693	0.244689	0.58685	0.20515	0.924696	621	k__Bacteria;p__Proteobacteria;c__Alphaproteobacteria;o__Caulobacterales;f__Caulobacteraceae;__
149	0.00637747	0.00100667		1.46248e-05	0.655849	0.0793476	0.0498114	0.0300324	0.00738395	17	k__Bacteria;__;__;__;__;__
150	0.00646951	0.00101342		0.334499	0.438062	0.00298757	0.0191691	7.20238e-07	0.137798	379	k__Bacteria;p__Chloroflexi;c__P2-11E;o__;f__;g__
151	0.00718177	0.00102018		0.0692606	0.0011522	0.136547	0.0130967	0.19644	0.905897	559	k__Bacteria;p__NKB19;c__;o__;f__;g__
152	0.00723916	0.00102693		0.0265932	0.849398	0.451719	0.304905	0.163501	0.788776	446	k__Bacteria;p__Firmicutes;c__Bacilli;o__Bacillales;f__Paenibacillaceae;g__Paenibacillus
153	0.00740979	0.00103369		0.000978154	0.294876	0.37852	0.907555	0.407495	0.349281	257	k__Bacteria;p__Bacteroidetes;c__Cytophagia;o__Cytophagales;f__Cytophagaceae;g__Rhodocytophaga
154	0.00741394	0.00104045		3.35221e-05	0.0837053	0.0288174	0.0951257	0.412446	0.295194	147	k__Bacteria;p__Actinobacteria;c__Actinobacteria;o__Actinomycetales;f__Nocardioidaceae;g__Kribbella
155	0.0074596	0.0010472		0.646731	0.427113	3.06927e-08	4.19328e-10	1.36928e-13	0.697021	102	k__Bacteria;p__Actinobacteria;c__Actinobacteria;o__Actinomycetales;f__Glycomycetaceae;g__Glycomyces
156	0.00757199	0.00105396		0.708295	0.987956	0.0268304	0.0159881	4.39832e-07	0.217224	151	k__Bacteria;p__Actinobacteria;c__Actinobacteria;o__Actinomycetales;f__Nocardiopsaceae;__
157	0.00777347	0.00106071		0.968756	0.663005	2.57484e-05	1.69123e-06	2.13049e-11	0.781825	179	k__Bacteria;p__Actinobacteria;c__Actinobacteria;o__Actinomycetales;f__Thermomonosporaceae;g__Actinomadura
158	0.0077911	0.00106747		0.45847	0.20995	0.435581	0.225387	0.536222	0.123273	143	k__Bacteria;p__Actinobacteria;c__Actinobacteria;o__Actinomycetales;f__Nocardioidaceae;__
159	0.00798271	0.00107423		0.442566	0.108508	0.823147	0.664576	0.895579	0.571939	716	k__Bacteria;p__Proteobacteria;c__Alphaproteobacteria;o__Sphingomonadales;f__Erythrobacteraceae;__
160	0.00798916	0.00108098		0.739223	0.968988	0.523006	0.664043	0.665419	0.634303	766	k__Bacteria;p__Proteobacteria;c__Betaproteobacteria;o__Nitrosomonadales;f__Nitrosomonadaceae;g__
161	0.00815373	0.00108774		0.359636	0.973577	1.50362e-06	5.08902e-06	5.83013e-05	0.525234	55	k__Bacteria;p__Acidobacteria;c__[Chloracidobacteria];o__RB41;f__;g__
162	0.0082891	0.0010945		0.0358677	0.00198704	0.322626	0.181677	0.759812	0.107958	67	k__Bacteria;p__Actinobacteria;c__Acidimicrobiia;o__Acidimicrobiales;f__Iamiaceae;g__Iamia
163	0.00832007	0.00110125		2.13127e-10	0.484961	0.995566	0.697219	0.93443	0.782345	762	k__Bacteria;p__Proteobacteria;c__Betaproteobacteria;o__Methylophilales;f__Methylophilaceae;g__
164	0.00853326	0.00110801		0.238031	0.30191	0.211513	0.248658	0.144129	0.147012	821	k__Bacteria;p__Proteobacteria;c__Deltaproteobacteria;o__[Entotheonellales];f__[Entotheonellaceae];g__
165	0.0089083	0.00111476		0.22576	0.315266	0.685346	0.99374	0.723446	0.717571	777	k__Bacteria;p__Proteobacteria;c__Deltaproteobacteria;o__Bdellovibrionales;f__Bacteriovoracaceae;g__
166	0.00935814	0.00112152		0.191182	0.120318	0.874248	0.584774	0.750547	0.960828	855	k__Bacteria;p__Proteobacteria;c__Gammaproteobacteria;o__Enterobacteriales;f__Enterobacteriaceae;g__Erwinia
167	0.00949534	0.00112828		0.594084	0.00011988	0.07878	0.070334	0.24026	0.0827051	456	k__Bacteria;p__Firmicutes;c__Bacilli;o__Bacillales;f__Staphylococcaceae;g__Jeotgalicoccus
168	0.00953783	0.00113503		0.563346	0.00299372	0.714614	0.350651	0.256946	0.0579942	190	k__Bacteria;p__Actinobacteria;c__Nitriliruptoria;o__Nitriliruptorales;f__Nitriliruptoraceae;g__
169	0.0097798	0.00114179		0.28351	0.00102039	0.479779	0.0544714	0.449647	0.316417	165	k__Bacteria;p__Actinobacteria;c__Actinobacteria;o__Actinomycetales;f__Sanguibacteraceae;g__Sanguibacter
170	0.0099935	0.00114854		0.537684	0.633129	0.680515	0.404687	0.465825	0.505539	25	k__Bacteria;p__Acidobacteria;c__Acidobacteria-6;o__CCU21;f__;g__
171	0.0100764	0.0011553		0.276194	0.609919	0.449865	0.225786	0.41341	0.828188	7	k__Archaea;p__Euryarchaeota;c__Methanobacteria;o__Methanobacteriales;f__Methanobacteriaceae;g__Methanobrevibacter
172	0.0102372	0.00116206		0.976506	0.580444	0.0383236	0.0282628	0.0323796	0.292184	52	k__Bacteria;p__Acidobacteria;c__[Chloracidobacteria];o__11-24;f__;g__
173	0.0103959	0.00116881		0.322146	0.00735869	0.211433	0.179552	0.780521	0.110336	274	k__Bacteria;p__Bacteroidetes;c__Flavobacteriia;o__Flavobacteriales;f__Cryomorphaceae;g__Owenweeksia
174	0.0104603	0.00117557		0.00350139	0.154898	0.00079367	0.0106605	0.000161168	0.297357	689	k__Bacteria;p__Proteobacteria;c__Alphaproteobacteria;o__Rhodospirillales;f__Acetobacteraceae;g__Roseococcus
175	0.0106442	0.00118233		0.0382744	0.426134	0.0244419	0.242936	0.00204922	0.13937	683	k__Bacteria;p__Proteobacteria;c__Alphaproteobacteria;o__Rhodobacterales;f__Rhodobacteraceae;g__Rubellimicrobium
176	0.0107291	0.00118908		0.00922735	0.683245	0.0329158	0.0897743	0.016507	0.686132	818	k__Bacteria;p__Proteobacteria;c__Deltaproteobacteria;o__Syntrophobacterales;f__Syntrophobacteraceae;g__
177	0.0109808	0.00119584		0.0911479	0.0506853	0.242745	0.462938	0.998414	0.516145	457	k__Bacteria;p__Firmicutes;c__Bacilli;o__Bacillales;f__Staphylococcaceae;g__Staphylococcus
178	0.0110071	0.00120259		0.332056	0.340719	0.948243	0.507189	0.949373	0.0620547	86	k__Bacteria;p__Actinobacteria;c__Actinobacteria;o__Actinomycetales;f__Cellulomonadaceae;g__Cellulomonas
179	0.0111047	0.00120935		0.974995	0.253125	0.0103445	0.0331689	0.0395342	0.0417231	393	k__Bacteria;p__Chloroflexi;c__Thermomicrobia;__;__;__
180	0.0111675	0.00121611		0.607397	0.530896	0.449574	0.483035	0.573186	0.884813	556	k__Bacteria;p__MVP-21;c__;o__;f__;g__
181	0.0111795	0.00122286		0.363214	0.138787	0.643441	0.507777	0.860913	0.909453	496	k__Bacteria;p__Firmicutes;c__Clostridia;o__Clostridiales;f__Gracilibacteraceae;g__
182	0.011796	0.00122962		0.687899	0.639689	0.267542	0.139638	0.513435	0.481898	645	k__Bacteria;p__Proteobacteria;c__Alphaproteobacteria;o__Rhizobiales;f__Hyphomicrobiaceae;g__Devosia
183	0.0122499	0.00123637		0.746211	0.289388	2.61801e-06	1.18175e-05	0.00178132	0.208567	386	k__Bacteria;p__Chloroflexi;c__TK10;o__AKYG885;f__;g__
184	0.0127011	0.00124313		0.00305566	0.0312823	0.812823	0.516712	0.687406	0.661223	489	k__Bacteria;p__Firmicutes;c__Clostridia;o__Clostridiales;f__Clostridiaceae;g__Clostridium
185	0.0128736	0.00124989		0.602633	0.000171599	0.085941	0.0770687	0.251293	0.090052	467	k__Bacteria;p__Firmicutes;c__Bacilli;o__Lactobacillales;f__Carnobacteriaceae;g__Trichococcus
186	0.0134864	0.00125664		0.65859	0.86647	0.000327792	5.52291e-07	0.000347211	0.229771	717	k__Bacteria;p__Proteobacteria;c__Alphaproteobacteria;o__Sphingomonadales;f__Erythrobacteraceae;g__
187	0.01408	0.0012634		0.572871	5.81249e-05	0.189865	0.0796909	0.626218	0.783553	675	k__Bacteria;p__Proteobacteria;c__Alphaproteobacteria;o__Rhodobacterales;f__Hyphomonadaceae;g__
188	0.0141019	0.00127016		0.0610944	1.11411e-05	0.0119823	0.000521934	0.0814079	0.332888	947	k__Bacteria;p__Verrucomicrobia;c__Opitutae;o__[Pelagicoccales];f__[Pelagicoccaceae];g__Pelagicoccus
189	0.0141729	0.00127691		0.159357	0.98085	0.385602	0.163538	0.160177	0.132571	183	k__Bacteria;p__Actinobacteria;c__Actinobacteria;o__Micrococcales;f__;g__
190	0.0142642	0.00128367		0.242713	0.00207915	0.102773	0.0763854	0.340234	0.0349632	849	k__Bacteria;p__Proteobacteria;c__Gammaproteobacteria;o__Chromatiales;f__Chromatiaceae;g__Nitrosococcus
191	0.0145811	0.00129042		0.151841	0.0125862	0.346307	0.24136	0.534188	0.23468	330	k__Bacteria;p__Chlorobi;c__OPB56;o__;f__;g__
192	0.0146584	0.00129718		0.729031	0.0982511	0.983086	0.792498	0.852474	0.524178	676	k__Bacteria;p__Proteobacteria;c__Alphaproteobacteria;o__Rhodobacterales;f__Hyphomonadaceae;g__Maricaulis
193	0.0146584	0.00130394		0.729031	0.0982511	0.983086	0.792498	0.852474	0.524178	684	k__Bacteria;p__Proteobacteria;c__Alphaproteobacteria;o__Rhodobacterales;f__Rhodobacteraceae;g__Thalassobius
194	0.0149636	0.00131069		0.489807	0.00509394	0.988119	0.617071	0.346521	0.667197	596	k__Bacteria;p__Planctomycetes;c__Pla3;o__;f__;g__
195	0.0149712	0.00131745		0.00780824	0.0092037	0.224268	0.786104	0.144276	0.873775	635	k__Bacteria;p__Proteobacteria;c__Alphaproteobacteria;o__Rhizobiales;f__Bradyrhizobiaceae;__
196	0.0149799	0.0013242		0.25897	0.000446281	0.137907	0.0110016	0.425156	0.997312	447	k__Bacteria;p__Firmicutes;c__Bacilli;o__Bacillales;f__Planococcaceae;__
197	0.0160533	0.00133096		0.921228	0.682958	1.83227e-05	2.94526e-05	6.27841e-12	0.984318	164	k__Bacteria;p__Actinobacteria;c__Actinobacteria;o__Actinomycetales;f__Pseudonocardiaceae;g__Saccharopolyspora
198	0.0161303	0.00133772		0.227107	0.817444	0.0271974	0.0274074	4.26032e-05	0.88027	74	k__Bacteria;p__Actinobacteria;c__Actinobacteria;o__Actinomycetales;__;__
199	0.0165583	0.00134447		0.311821	0.784748	0.493186	0.419873	0.0876077	0.385672	145	k__Bacteria;p__Actinobacteria;c__Actinobacteria;o__Actinomycetales;f__Nocardioidaceae;g__Actinopolymorpha
200	0.0166431	0.00135123		0.665815	0.00488901	0.865566	0.74098	0.633649	0.0940854	36	k__Bacteria;p__Acidobacteria;c__BPC102;o__B110;f__;g__
201	0.0175431	0.00135798		0.483263	0.00122235	0.0656405	0.0724968	0.220332	0.066907	88	k__Bacteria;p__Actinobacteria;c__Actinobacteria;o__Actinomycetales;f__Corynebacteriaceae;g__Corynebacterium
202	0.0177761	0.00136474		0.158686	0.141049	0.27875	0.223122	0.68192	0.476018	444	k__Bacteria;p__Firmicutes;c__Bacilli;o__Bacillales;f__Paenibacillaceae;g__Ammoniphilus
203	0.0181571	0.0013715		0.538729	0.975796	0.0730816	0.0952504	0.0834759	0.653881	193	k__Bacteria;p__Actinobacteria;c__Rubrobacteria;o__Rubrobacterales;f__Rubrobacteraceae;g__
204	0.0182103	0.00137825		0.906923	0.992509	0.00935105	0.0139251	0.0180906	0.294169	622	k__Bacteria;p__Proteobacteria;c__Alphaproteobacteria;o__Caulobacterales;f__Caulobacteraceae;g__
205	0.0186722	0.00138501		0.0374976	0.114221	0.419363	0.11356	0.612655	0.227733	58	k__Bacteria;p__Acidobacteria;c__iii1-8;o__DS-18;f__;g__
206	0.0190576	0.00139177		0.445858	0.306088	0.772198	0.563171	0.357436	0.155765	627	k__Bacteria;p__Proteobacteria;c__Alphaproteobacteria;o__Caulobacterales;f__Caulobacteraceae;g__Phenylobacterium
207	0.0197964	0.00139852		0.929009	0.723885	2.57767e-05	4.0008e-05	1.35417e-11	0.997959	24	k__Bacteria;p__Acidobacteria;c__Acidobacteria-6;o__BPC015;f__;g__
208	0.0202531	0.00140528		0.531489	0.00918573	0.137292	0.0652312	0.157018	0.21133	381	k__Bacteria;p__Chloroflexi;c__SAR202;o__;f__;g__
209	0.0213259	0.00141203		0.908345	0.878496	6.59784e-05	0.000143712	1.46033e-10	0.944561	757	k__Bacteria;p__Proteobacteria;c__Betaproteobacteria;o__IS-44;f__;g__
210	0.0218608	0.00141879		0.0724375	0.496813	0.802427	0.964188	0.411959	0.530839	168	k__Bacteria;p__Actinobacteria;c__Actinobacteria;o__Actinomycetales;f__Streptomycetaceae;__
211	0.0227866	0.00142555		0.667444	0.864665	0.672118	0.782511	0.405193	0.811704	739	k__Bacteria;p__Proteobacteria;c__Betaproteobacteria;o__Burkholderiales;f__Comamonadaceae;__
212	0.0229534	0.0014323		0.172227	0.618958	0.00371058	0.0133698	1.0464e-06	0.813362	731	k__Bacteria;p__Proteobacteria;c__Betaproteobacteria;o__Burkholderiales;f__Alcaligenaceae;__
213	0.0230228	0.00143906		0.0478038	0.000220063	0.0071411	0.00101485	0.152704	0.00501874	28	k__Bacteria;p__Acidobacteria;c__Acidobacteria-6;o__iii1-15;f__RB40;g__
214	0.0233266	0.00144581		0.00909227	0.448588	0.071606	0.138107	0.0194086	0.59438	967	k__Bacteria;p__Verrucomicrobia;c__[Spartobacteria];o__[Chthoniobacterales];f__[Chthoniobacteraceae];g__
215	0.023433	0.00145257		0.447798	0.0895238	0.0853147	0.0228418	0.093077	0.324035	10	k__Archaea;p__Euryarchaeota;c__Methanomicrobia;o__Methanosarcinales;f__Methanosarcinaceae;g__Methanolobus
216	0.0240762	0.00145933		0.707056	0.137434	0.786775	0.943186	0.641898	0.473564	123	k__Bacteria;p__Actinobacteria;c__Actinobacteria;o__Actinomycetales;f__Micrococcaceae;g__Citricoccus
217	0.0241246	0.00146608		0.930234	0.728473	3.5486e-05	5.42907e-05	3.01816e-11	0.997994	5	k__Archaea;p__Crenarchaeota;c__Thaumarchaeota;o__Cenarchaeales;f__SAGMA-X;g__
218	0.0244816	0.00147284		0.766637	0.505319	0.649839	0.706397	0.531217	0.956069	318	k__Bacteria;p__Chlamydiae;c__Chlamydiia;o__Chlamydiales;f__Parachlamydiaceae;__
219	0.0247069	0.0014796		0.885062	0.136728	0.952032	0.826748	0.963403	0.679808	116	k__Bacteria;p__Actinobacteria;c__Actinobacteria;o__Actinomycetales;f__Microbacteriaceae;g__Frigoribacterium
220	0.0247167	0.00148635		0.887614	0.289887	0.363885	0.0211178	0.122097	0.129861	170	k__Bacteria;p__Actinobacteria;c__Actinobacteria;o__Actinomycetales;f__Streptomycetaceae;g__Streptomyces
221	0.0248956	0.00149311		0.00838122	0.601279	0.500941	0.784877	0.0881651	0.242238	260	k__Bacteria;p__Bacteroidetes;c__Cytophagia;o__Cytophagales;f__Cytophagaceae;g__Sporocytophaga
222	0.0257309	0.00149986		0.00427418	0.0798961	0.0458357	0.1298	0.441798	0.20527	92	k__Bacteria;p__Actinobacteria;c__Actinobacteria;o__Actinomycetales;f__Dermabacteraceae;g__Brachybacterium
223	0.0259047	0.00150662		0.373519	0.00995355	0.75252	0.247542	0.563365	0.0093635	884	k__Bacteria;p__Proteobacteria;c__Gammaproteobacteria;o__Pseudomonadales;f__Moraxellaceae;g__Acinetobacter
224	0.0261119	0.00151338		0.00926527	0.435521	0.0505202	0.0320668	0.143563	0.356467	639	k__Bacteria;p__Proteobacteria;c__Alphaproteobacteria;o__Rhizobiales;f__Bradyrhizobiaceae;g__Bradyrhizobium
225	0.026178	0.00152013		0.713018	0.152793	0.912165	0.808023	0.921673	0.902099	115	k__Bacteria;p__Actinobacteria;c__Actinobacteria;o__Actinomycetales;f__Microbacteriaceae;g__Curtobacterium
226	0.0265811	0.00152689		0.295409	0.0211291	0.298976	0.489518	0.907948	0.0704454	806	k__Bacteria;p__Proteobacteria;c__Deltaproteobacteria;o__Myxococcales;f__Nannocystaceae;g__Nannocystis
227	0.0266169	0.00153364		0.00510269	0.000822726	0.7852	0.778559	0.745651	0.0594182	250	k__Bacteria;p__Bacteroidetes;c__Cytophagia;o__Cytophagales;f__Cytophagaceae;g__
228	0.0273929	0.0015404		0.246986	0.000434229	0.922198	0.281977	0.807046	0.788489	454	k__Bacteria;p__Firmicutes;c__Bacilli;o__Bacillales;f__Planococcaceae;g__Solibacillus
229	0.0274077	0.00154716		0.000155934	0.153167	0.333288	0.584355	0.613358	0.252854	944	k__Bacteria;p__Verrucomicrobia;c__Opitutae;o__Opitutales;f__Opitutaceae;g__Opitutus
230	0.0275208	0.00155391		0.224398	0.511423	0.455729	0.729514	0.318312	0.456848	847	k__Bacteria;p__Proteobacteria;c__Gammaproteobacteria;o__Chromatiales;__;__
231	0.0279136	0.00156067		0.84009	0.0050622	0.612395	0.847993	0.517835	0.35378	881	k__Bacteria;p__Proteobacteria;c__Gammaproteobacteria;o__Oceanospirillales;f__Halomonadaceae;g__Halomonas
232	0.0290291	0.00156743		0.034183	0.826728	0.0150432	0.0173789	0.0299728	0.500766	552	k__Bacteria;p__Gemmatimonadetes;c__Gemmatimonadetes;o__Gemmatimonadales;f__Gemmatimonadaceae;g__Gemmatimonas
233	0.0293449	0.00157418		0.503263	0.725428	0.0776088	0.0534668	0.601713	0.290034	209	k__Bacteria;p__Armatimonadetes;c__Armatimonadia;o__Armatimonadales;f__Armatimonadaceae;g__
234	0.0293578	0.00158094		0.143839	0.137098	0.00408906	0.367694	0.0494293	0.242992	6	k__Archaea;p__Crenarchaeota;c__Thaumarchaeota;o__Nitrososphaerales;f__Nitrososphaeraceae;g__Candidatus Nitrososphaera
235	0.0294681	0.00158769		0.436421	0.00203194	0.497611	0.499558	0.849306	0.850762	584	k__Bacteria;p__Planctomycetes;c__OM190;o__agg27;f__;g__
236	0.0304158	0.00159445		0.0109329	0.0161699	0.0212135	0.065173	0.0136445	0.0780421	141	k__Bacteria;p__Actinobacteria;c__Actinobacteria;o__Actinomycetales;f__Nocardiaceae;g__Nocardia
237	0.0310402	0.00160121		0.188869	0.0757208	0.0716706	0.109549	0.356534	0.526268	122	k__Bacteria;p__Actinobacteria;c__Actinobacteria;o__Actinomycetales;f__Micrococcaceae;g__Arthrobacter
238	0.0312369	0.00160796		0.037414	0.00972159	0.309737	0.00551836	0.374607	0.181194	692	k__Bacteria;p__Proteobacteria;c__Alphaproteobacteria;o__Rhodospirillales;f__Rhodospirillaceae;g__
239	0.0313129	0.00161472		0.0391838	0.117539	0.941241	0.772126	0.609659	0.691946	94	k__Bacteria;p__Actinobacteria;c__Actinobacteria;o__Actinomycetales;f__Dietziaceae;g__Dietzia
240	0.032502	0.00162147		0.1795	0.990736	0.795609	0.520281	0.536152	0.641333	569	k__Bacteria;p__OD1;c__ZB2;o__;f__;g__
241	0.0327348	0.00162823		0.648817	0.786851	0.856444	0.728435	0.602525	0.297855	531	k__Bacteria;p__Firmicutes;c__Clostridia;o__OPB54;f__;g__
242	0.0329966	0.00163499		0.974327	0.059242	0.884231	0.636654	0.773785	0.96583	9	k__Archaea;p__Euryarchaeota;c__Methanomicrobia;o__Methanomicrobiales;f__;g__
243	0.0331952	0.00164174		0.788215	0.378422	0.240506	0.334876	0.0652293	0.72134	633	k__Bacteria;p__Proteobacteria;c__Alphaproteobacteria;o__Rhizobiales;f__Aurantimonadaceae;g__
244	0.0337999	0.0016485		0.24754	0.76607	0.207334	0.0844534	0.121924	0.0788367	659	k__Bacteria;p__Proteobacteria;c__Alphaproteobacteria;o__Rhizobiales;f__Phyllobacteriaceae;g__
245	0.0347701	0.00165526		0.056122	0.156533	0.799297	0.868464	0.715461	0.470708	899	k__Bacteria;p__Proteobacteria;c__Gammaproteobacteria;o__Xanthomonadales;f__Xanthomonadaceae;g__Arenimonas
246	0.035687	0.00166201		0.198571	0.101137	0.251102	0.100428	0.758421	0.309731	824	k__Bacteria;p__Proteobacteria;c__Gammaproteobacteria;__;__;__
247	0.036113	0.00166877		0.0113541	0.432503	0.241708	0.874847	0.358861	0.721787	745	k__Bacteria;p__Proteobacteria;c__Betaproteobacteria;o__Burkholderiales;f__Comamonadaceae;g__Ramlibacter
248	0.0372129	0.00167552		0.134456	0.00278059	0.2224	0.0437353	0.312079	0.751372	939	k__Bacteria;p__Verrucomicrobia;c__Opitutae;__;__;__
249	0.0377081	0.00168228		0.801341	0.00396074	0.265188	0.195392	0.669133	0.0203339	461	k__Bacteria;p__Firmicutes;c__Bacilli;o__Bacillales;f__[Exiguobacteraceae];g__Exiguobacterium
250	0.0381156	0.00168904		0.631051	0.561215	0.372427	0.195324	0.314294	0.820505	923	k__Bacteria;p__TM7;c__SC3;o__;f__;g__
251	0.0383485	0.00169579		0.284247	0.017694	0.690945	0.646774	0.823628	0.316316	281	k__Bacteria;p__Bacteroidetes;c__Flavobacteriia;o__Flavobacteriales;f__Flavobacteriaceae;g__Gillisia
252	0.0395271	0.00170255		0.956139	0.497207	0.879923	0.800176	0.830899	0.700344	108	k__Bacteria;p__Actinobacteria;c__Actinobacteria;o__Actinomycetales;f__Kineosporiaceae;__
253	0.0395271	0.0017093		0.956139	0.497207	0.879923	0.800176	0.830899	0.700344	410	k__Bacteria;p__Cyanobacteria;c__Chloroplast;o__Chlorophyta;f__Chlamydomonadaceae;g__Oophila
254	0.0395271	0.00171606		0.956139	0.497207	0.879923	0.800176	0.830899	0.700344	325	k__Bacteria;p__Chlorobi;__;__;__;__
255	0.0408801	0.00172282		0.57969	0.459057	0.843953	0.961905	0.989776	0.595453	429	k__Bacteria;p__Fibrobacteres;c__Fibrobacteria;o__258ds10;f__;g__
256	0.0417117	0.00172957		0.687034	0.422095	0.754768	0.820454	0.668296	0.455468	964	k__Bacteria;p__Verrucomicrobia;c__[Spartobacteria];o__[Chthoniobacterales];__;__
257	0.0417639	0.00173633		0.108817	0.697954	0.430528	0.423451	0.000341099	0.863357	161	k__Bacteria;p__Actinobacteria;c__Actinobacteria;o__Actinomycetales;f__Pseudonocardiaceae;g__Amycolatopsis
258	0.0422141	0.00174309		0.889025	0.00432378	0.454583	0.710968	0.619964	0.557753	843	k__Bacteria;p__Proteobacteria;c__Gammaproteobacteria;o__Alteromonadales;f__OM60;g__
259	0.0429352	0.00174984		0.434911	0.815282	0.254461	0.67416	0.218727	0.0565775	652	k__Bacteria;p__Proteobacteria;c__Alphaproteobacteria;o__Rhizobiales;f__Methylobacteriaceae;g__Methylobacterium
260	0.0429524	0.0017566		0.503025	0.407346	0.944406	0.810288	0.920561	0.768382	95	k__Bacteria;p__Actinobacteria;c__Actinobacteria;o__Actinomycetales;f__Frankiaceae;__
261	0.0429524	0.00176335		0.503025	0.407346	0.944406	0.810288	0.920561	0.768382	892	k__Bacteria;p__Proteobacteria;c__Gammaproteobacteria;o__Xanthomonadales;__;__
262	0.0429524	0.00177011		0.503025	0.407346	0.944406	0.810288	0.920561	0.768382	930	k__Bacteria;p__Tenericutes;c__Mollicutes;o__;f__;g__
263	0.0429588	0.00177687		0.0585773	0.319593	0.281935	0.148672	0.343789	0.667565	672	k__Bacteria;p__Proteobacteria;c__Alphaproteobacteria;o__Rhizobiales;f__Rhodobiaceae;g__
264	0.043047	0.00178362		0.951201	0.741682	0.000109684	0.000162827	4.45658e-10	0.994811	557	k__Bacteria;p__NC10;c__12-24;o__MIZ17;f__;g__
265	0.0437052	0.00179038		0.327792	0.561537	4.20096e-05	8.53269e-06	0.000486858	0.0687313	208	k__Bacteria;p__Armatimonadetes;c__0319-6E2;o__;f__;g__
266	0.0443059	0.00179713		0.0329718	0.221134	0.440408	0.32814	0.340851	0.108575	343	k__Bacteria;p__Chloroflexi;c__Anaerolineae;o__Caldilineales;f__Caldilineaceae;g__
267	0.0449346	0.00180389		0.115249	0.00178444	0.19269	0.0273494	0.239966	0.998784	781	k__Bacteria;p__Proteobacteria;c__Deltaproteobacteria;o__Desulfobacterales;f__Desulfobacteraceae;g__Desulfococcus
268	0.045416	0.00181065		0.663622	0.230976	0.00324622	0.000202557	3.70317e-05	0.439069	162	k__Bacteria;p__Actinobacteria;c__Actinobacteria;o__Actinomycetales;f__Pseudonocardiaceae;g__Jiangella
269	0.0461306	0.0018174		0.31538	0.500196	0.116695	0.0218288	0.0174124	0.701536	296	k__Bacteria;p__Bacteroidetes;c__Sphingobacteriia;o__Sphingobacteriales;f__Sphingobacteriaceae;g__Olivibacter
270	0.0473418	0.00182416		0.956854	0.315143	0.910298	0.758663	0.78217	0.698221	711	k__Bacteria;p__Proteobacteria;c__Alphaproteobacteria;o__Rickettsiales;f__mitochondria;g__Phytophthora
271	0.0493366	0.00183091		0.998249	0.660016	0.938718	0.754634	0.785914	0.815093	572	k__Bacteria;p__OP11;c__WCHB1-64;o__d153;f__;g__
272	0.0493366	0.00183767		0.998249	0.660016	0.938718	0.754634	0.785914	0.815093	700	k__Bacteria;p__Proteobacteria;c__Alphaproteobacteria;o__Rickettsiales;__;__
273	0.0493366	0.00184443		0.998249	0.660016	0.938718	0.754634	0.785914	0.815093	537	k__Bacteria;p__GN02;c__;o__;f__;g__
274	0.0495753	0.00185118		0.240158	0.720866	0.100029	0.221415	0.00019351	0.955207	988	k__Bacteria;p__[Thermi];c__Deinococci;o__Deinococcales;f__Trueperaceae;g__Truepera
275	0.0505478	0.00185794		0.673715	0.0676793	0.798314	0.838921	0.755681	0.810922	413	k__Bacteria;p__Cyanobacteria;c__ML635J-21;o__;f__;g__
276	0.0513632	0.0018647		0.512265	0.602789	0.00465003	0.00122559	0.15022	0.0188496	201	k__Bacteria;p__Actinobacteria;c__Thermoleophilia;o__Solirubrobacterales;f__Conexibacteraceae;g__
277	0.0519991	0.00187145		0.494033	0.680895	7.24675e-05	0.000859719	0.0133815	0.458136	369	k__Bacteria;p__Chloroflexi;c__Chloroflexi;o__[Roseiflexales];__;__
278	0.0525299	0.00187821		0.509207	0.940589	0.978416	0.77506	0.488042	0.490554	411	k__Bacteria;p__Cyanobacteria;c__Chloroplast;o__Stramenopiles;f__;g__
279	0.0527315	0.00188496		1.20405e-06	0.0965199	0.50431	0.143438	0.803222	0.652149	721	k__Bacteria;p__Proteobacteria;c__Alphaproteobacteria;o__Sphingomonadales;f__Sphingomonadaceae;g__Kaistobacter
280	0.0530427	0.00189172		0.245974	0.824733	0.931107	0.945106	0.994344	0.673739	363	k__Bacteria;p__Chloroflexi;c__Chloroflexi;o__Chloroflexales;f__Chloroflexaceae;__
281	0.0536244	0.00189848		0.0421056	0.00231556	0.82203	0.62362	0.98292	0.500043	159	k__Bacteria;p__Actinobacteria;c__Actinobacteria;o__Actinomycetales;f__Pseudonocardiaceae;g__
282	0.0538004	0.00190523		0.584587	0.271489	0.566611	0.495998	0.809165	0.650339	364	k__Bacteria;p__Chloroflexi;c__Chloroflexi;o__Chloroflexales;f__Chloroflexaceae;g__
283	0.0558617	0.00191199		0.76868	0.4842	0.531143	0.504834	0.61453	0.692659	367	k__Bacteria;p__Chloroflexi;c__Chloroflexi;o__Chloroflexales;f__Oscillochloridaceae;g__Oscillochloris
284	0.056098	0.00191874		0.381399	0.535445	0.369383	0.364302	0.826033	0.593613	710	k__Bacteria;p__Proteobacteria;c__Alphaproteobacteria;o__Rickettsiales;f__mitochondria;g__Malawimonas
285	0.0570228	0.0019255		0.0615851	0.296183	0.00136507	0.000861704	0.0108137	0.912414	971	k__Bacteria;p__Verrucomicrobia;c__[Spartobacteria];o__[Chthoniobacterales];f__[Chthoniobacteraceae];g__Ellin506
286	0.0583846	0.00193226		0.261149	0.318937	0.832949	0.600863	0.552304	0.314339	853	k__Bacteria;p__Proteobacteria;c__Gammaproteobacteria;o__Enterobacteriales;f__Enterobacteriaceae;__
287	0.0600408	0.00193901		0.359444	0.0050784	0.0772262	0.0538975	0.118087	0.225075	465	k__Bacteria;p__Firmicutes;c__Bacilli;o__Lactobacillales;f__Aerococcaceae;g__Facklamia
288	0.0607795	0.00194577		0.269837	0.743558	0.012728	0.00670691	0.00207391	0.485193	800	k__Bacteria;p__Proteobacteria;c__Deltaproteobacteria;o__Myxococcales;f__Haliangiaceae;g__Haliangium
289	0.0610431	0.00195253		0.329348	4.95634e-05	0.00789206	0.00330531	0.127148	0.00443146	839	k__Bacteria;p__Proteobacteria;c__Gammaproteobacteria;o__Alteromonadales;f__HTCC2188;g__HTCC
290	0.0611236	0.00195928		0.465265	0.611941	0.868786	0.842975	0.823903	0.835608	21	k__Bacteria;p__Acidobacteria;c__AT-s54;o__;f__;g__
291	0.062328	0.00196604		0.0912201	0.00732275	0.0890281	0.0128277	0.554627	0.266868	262	k__Bacteria;p__Bacteroidetes;c__Cytophagia;o__Cytophagales;f__Flammeovirgaceae;g__
292	0.0628616	0.00197279		0.415611	0.362405	0.0192721	0.289065	0.037858	0.211887	200	k__Bacteria;p__Actinobacteria;c__Thermoleophilia;o__Solirubrobacterales;f__;g__
293	0.063716	0.00197955		0.987886	0.564305	0.118023	0.0466251	0.0471497	0.728061	389	k__Bacteria;p__Chloroflexi;c__TK10;o__B07_WMSP1;f__;g__
294	0.0637826	0.00198631		0.366055	0.15192	0.014719	0.00883427	0.136316	0.246765	223	k__Bacteria;p__Bacteroidetes;c__At12OctB3;o__;f__;g__
295	0.0638042	0.00199306		0.0328395	0.000418442	0.108424	0.0636797	0.493947	0.714797	590	k__Bacteria;p__Planctomycetes;c__Phycisphaerae;o__Phycisphaerales;f__;g__
296	0.0649839	0.00199982		0.391416	0.000959344	0.851917	0.935941	0.835061	0.886206	130	k__Bacteria;p__Actinobacteria;c__Actinobacteria;o__Actinomycetales;f__Micromonosporaceae;g__Catellatospora
297	0.0651876	0.00200657		0.0144501	0.170056	0.290919	0.515727	0.987536	0.267991	251	k__Bacteria;p__Bacteroidetes;c__Cytophagia;o__Cytophagales;f__Cytophagaceae;g__Adhaeribacter
298	0.0660113	0.00201333		0.798143	0.787991	0.880108	0.825569	0.777642	0.460669	626	k__Bacteria;p__Proteobacteria;c__Alphaproteobacteria;o__Caulobacterales;f__Caulobacteraceae;g__Mycoplana
299	0.0661637	0.00202009		0.00702648	0.902924	0.0661159	0.0841749	0.0853437	0.0571294	599	k__Bacteria;p__Planctomycetes;c__Planctomycetia;o__B97;f__;g__
300	0.0664042	0.00202684		0.557612	0.506498	0.734439	0.790812	0.655638	0.400149	978	k__Bacteria;p__WS3;c__PRR-12;o__Sediment-1;f__CV106;g__
301	0.0671253	0.0020336		0.428061	0.0247765	0.454926	0.136693	0.139669	0.0369373	513	k__Bacteria;p__Firmicutes;c__Clostridia;o__Clostridiales;f__Ruminococcaceae;__
302	0.0676791	0.00204036		0.657124	0.00135659	0.143161	0.131712	0.328008	0.148376	928	k__Bacteria;p__TM7;c__TM7-3;o__EW055;f__;g__
303	0.0678576	0.00204711		0.257348	0.100089	0.459045	0.38288	0.37642	0.283469	292	k__Bacteria;p__Bacteroidetes;c__Sphingobacteriia;o__Sphingobacteriales;f__;g__
304	0.0682213	0.00205387		0.640321	0.551798	0.93687	0.926657	0.842596	0.484497	427	k__Bacteria;p__Elusimicrobia;c__Elusimicrobia;o__MVP-88;f__;g__
305	0.0687651	0.00206062		0.882685	0.634198	0.0287103	0.0411828	0.000223143	0.704975	13	k__Archaea;p__Euryarchaeota;c__Thermoplasmata;o__E2;f__[Methanomassiliicoccaceae];g__
306	0.0694202	0.00206738		4.62053e-11	0.331529	0.30793	0.167819	0.417664	0.555197	551	k__Bacteria;p__Gemmatimonadetes;c__Gemmatimonadetes;o__Gemmatimonadales;f__Ellin5301;g__
307	0.0700234	0.00207414		0.086714	0.067993	0.00020433	0.022752	0.00296883	0.902098	644	k__Bacteria;p__Proteobacteria;c__Alphaproteobacteria;o__Rhizobiales;f__Hyphomicrobiaceae;g__
308	0.0701087	0.00208089		0.151107	0.255365	0.772918	0.688168	0.666768	0.990315	693	k__Bacteria;p__Proteobacteria;c__Alphaproteobacteria;o__Rhodospirillales;f__Rhodospirillaceae;g__Azospirillum
309	0.0701087	0.00208765		0.151107	0.255365	0.772918	0.688168	0.666768	0.990315	737	k__Bacteria;p__Proteobacteria;c__Betaproteobacteria;o__Burkholderiales;f__Alcaligenaceae;g__Tetrathiobacter
310	0.070689	0.0020944		0.605509	0.698568	0.988644	0.579796	0.477994	0.698275	198	k__Bacteria;p__Actinobacteria;c__Thermoleophilia;o__Gaiellales;f__Gaiellaceae;g__
311	0.0713242	0.00210116		0.953948	0.267936	0.00942569	0.00162555	0.196172	0.308885	275	k__Bacteria;p__Bacteroidetes;c__Flavobacteriia;o__Flavobacteriales;f__Flavobacteriaceae;__
312	0.0717678	0.00210792		0.0383467	0.714356	0.332368	0.200886	0.708681	0.577617	743	k__Bacteria;p__Proteobacteria;c__Betaproteobacteria;o__Burkholderiales;f__Comamonadaceae;g__Methylibium
313	0.0728418	0.00211467		0.0139011	0.142658	0.419201	0.928934	0.87276	0.499495	392	k__Bacteria;p__Chloroflexi;c__TK17;o__mle1-48;f__;g__
314	0.0742614	0.00212143		0.993178	0.050517	0.83061	0.981884	0.886549	0.948886	525	k__Bacteria;p__Firmicutes;c__Clostridia;o__Clostridiales;f__Veillonellaceae;g__Veillonella
315	0.0749188	0.00212819		0.38238	0.0272815	0.334211	0.0940046	0.106842	0.0542698	498	k__Bacteria;p__Firmicutes;c__Clostridia;o__Clostridiales;f__Lachnospiraceae;__
316	0.0754588	0.00213494		0.00590946	0.420766	0.355288	0.476974	0.336772	0.79225	642	k__Bacteria;p__Proteobacteria;c__Alphaproteobacteria;o__Rhizobiales;f__Brucellaceae;g__Ochrobactrum
317	0.0761646	0.0021417		0.797073	0.00115114	0.0261704	0.0367834	0.577565	0.206304	677	k__Bacteria;p__Proteobacteria;c__Alphaproteobacteria;o__Rhodobacterales;f__Rhodobacteraceae;__
318	0.0770912	0.00214845		0.169497	0.029636	0.0693094	0.0150805	0.580912	0.163987	247	k__Bacteria;p__Bacteroidetes;c__Cytophagia;o__Cytophagales;f__Cyclobacteriaceae;g__
319	0.0788607	0.00215521		0.897034	0.941496	0.739555	0.954129	0.899571	0.765159	306	k__Bacteria;p__Bacteroidetes;c__[Saprospirae];o__[Saprospirales];f__;g__
320	0.0792312	0.00216197		0.0451201	0.505323	0.610394	0.341538	0.937772	0.311896	192	k__Bacteria;p__Actinobacteria;c__OPB41;o__;f__;g__
321	0.0796729	0.00216872		0.391931	0.802868	0.0842386	0.0331819	0.0432414	0.047792	160	k__Bacteria;p__Actinobacteria;c__Actinobacteria;o__Actinomycetales;f__Pseudonocardiaceae;g__Actinomycetospora
322	0.0814649	0.00217548		0.130606	0.0647574	0.551024	0.319239	0.325129	0.336186	238	k__Bacteria;p__Bacteroidetes;c__Bacteroidia;o__Bacteroidales;f__[Odoribacteraceae];g__Butyricimonas
323	0.0818589	0.00218223		0.231426	0.0678937	0.0820843	0.0334977	0.137897	0.548587	480	k__Bacteria;p__Firmicutes;c__Clostridia;__;__;__
324	0.0825095	0.00218899		0.9977	0.837827	0.729219	0.431448	0.190507	0.0438569	650	k__Bacteria;p__Proteobacteria;c__Alphaproteobacteria;o__Rhizobiales;f__Hyphomicrobiaceae;g__Rhodoplanes
325	0.0861021	0.00219575		0.483091	0.0164683	0.764052	0.333035	0.248671	0.0951264	882	k__Bacteria;p__Proteobacteria;c__Gammaproteobacteria;o__Oceanospirillales;f__Oceanospirillaceae;g__
326	0.0862661	0.0022025		0.000391003	0.172781	0.00575267	0.0288141	0.00193115	0.105068	920	k__Bacteria;p__TM6;c__SJA-4;o__;f__;g__
327	0.0869318	0.00220926		0.361226	0.0941087	0.703712	0.683331	0.707348	0.878888	329	k__Bacteria;p__Chlorobi;c__Ignavibacteria;o__Ignavibacteriales;f__Ignavibacteriaceae;g__
328	0.0873259	0.00221602		0.00828979	0.16546	0.193296	0.307894	0.575198	0.630871	729	k__Bacteria;p__Proteobacteria;c__Betaproteobacteria;o__Burkholderiales;__;__
329	0.0900736	0.00222277		0.00014709	0.835132	0.879614	0.656386	0.625084	0.725851	49	k__Bacteria;p__Acidobacteria;c__Solibacteres;o__Solibacterales;f__Solibacteraceae;g__Candidatus Solibacter
330	0.0902718	0.00222953		0.123211	0.445409	0.000780815	0.00804968	0.00913921	0.4669	779	k__Bacteria;p__Proteobacteria;c__Deltaproteobacteria;o__Bdellovibrionales;f__Bdellovibrionaceae;g__
331	0.0949098	0.00223628		0.151379	0.214067	0.700837	0.609225	0.576431	0.869251	478	k__Bacteria;p__Firmicutes;c__Bacilli;o__Lactobacillales;f__Streptococcaceae;g__Streptococcus
332	0.0953022	0.00224304		0.443366	0.0473724	0.817098	0.4242	0.582497	0.0207804	501	k__Bacteria;p__Firmicutes;c__Clostridia;o__Clostridiales;f__Lachnospiraceae;g__Clostridium
333	0.0961049	0.0022498		0.0963499	0.0402257	0.0972345	0.00919565	0.242587	0.537227	338	k__Bacteria;p__Chloroflexi;c__Anaerolineae;o__Anaerolineales;f__Anaerolinaceae;g__Anaerolinea
334	0.0971099	0.00225655		0.298204	0.0193594	0.430509	0.130676	0.120748	0.0550406	242	k__Bacteria;p__Bacteroidetes;c__Bacteroidia;o__Bacteroidales;f__[Paraprevotellaceae];g__Paraprevotella
335	0.0976115	0.00226331		5.0964e-07	0.0188932	0.872178	0.933888	0.880398	0.2065	714	k__Bacteria;p__Proteobacteria;c__Alphaproteobacteria;o__Sphingomonadales;__;__
336	0.0990092	0.00227006		0.601815	0.249937	0.83172	0.603377	0.850411	0.342595	342	k__Bacteria;p__Chloroflexi;c__Anaerolineae;o__Caldilineales;f__Caldilineaceae;__
337	0.099349	0.00227682		0.207609	0.0769765	0.557789	0.62053	0.436387	0.304767	421	k__Bacteria;p__Cyanobacteria;c__Synechococcophycideae;o__Pseudanabaenales;f__;g__
338	0.100789	0.00228358		0.00802717	0.322396	0.413481	0.311174	0.529444	0.921018	908	k__Bacteria;p__Proteobacteria;c__Gammaproteobacteria;o__Xanthomonadales;f__Xanthomonadaceae;g__Stenotrophomonas
339	0.102858	0.00229033		0.0151572	0.781616	0.507818	0.523434	0.449004	0.537011	687	k__Bacteria;p__Proteobacteria;c__Alphaproteobacteria;o__Rhodospirillales;f__Acetobacteraceae;__
340	0.102944	0.00229709		0.0112738	0.899727	0.128813	0.133636	0.0358583	0.00236203	308	k__Bacteria;p__Bacteroidetes;c__[Saprospirae];o__[Saprospirales];f__Chitinophagaceae;g__
341	0.103123	0.00230385		0.86715	0.00530093	0.0394557	0.0300202	0.219506	0.0210559	304	k__Bacteria;p__Bacteroidetes;c__[Rhodothermi];o__[Rhodothermales];f__[Balneolaceae];g__KSA1
342	0.103478	0.0023106		0.364775	0.7828	0.01109	0.0398444	0.0587507	0.224013	648	k__Bacteria;p__Proteobacteria;c__Alphaproteobacteria;o__Rhizobiales;f__Hyphomicrobiaceae;g__Pedomicrobium
343	0.10492	0.00231736		0.486554	0.303958	0.0348046	0.017539	0.0454052	0.832654	384	k__Bacteria;p__Chloroflexi;c__TK10;o__;f__;g__
344	0.105191	0.00232411		0.310386	0.00259681	0.113281	0.0320368	0.661035	0.961193	276	k__Bacteria;p__Bacteroidetes;c__Flavobacteriia;o__Flavobacteriales;f__Flavobacteriaceae;g__
345	0.105922	0.00233087		0.808652	0.112072	0.141482	0.0527339	0.00320201	0.712135	541	k__Bacteria;p__Gemmatimonadetes;c__Gemm-1;o__;f__;g__
346	0.10623	0.00233763		0.430714	0.215333	0.887711	0.816441	0.709571	0.926206	646	k__Bacteria;p__Proteobacteria;c__Alphaproteobacteria;o__Rhizobiales;f__Hyphomicrobiaceae;g__Hyphomicrobium
347	0.111626	0.00234438		0.195913	0.845855	0.428143	0.816609	0.233104	0.283769	723	k__Bacteria;p__Proteobacteria;c__Alphaproteobacteria;o__Sphingomonadales;f__Sphingomonadaceae;g__Sphingobium
348	0.114417	0.00235114		0.361333	0.689667	0.395728	0.38732	0.348472	0.568012	54	k__Bacteria;p__Acidobacteria;c__[Chloracidobacteria];o__PK29;f__;g__
349	0.116107	0.00235789		0.29699	0.00506081	0.456329	0.925061	0.790424	0.0494737	563	k__Bacteria;p__Nitrospirae;c__Nitrospira;o__Nitrospirales;f__Nitrospiraceae;g__
350	0.116271	0.00236465		0.649518	0.757539	0.000705067	0.00203672	7.16994e-08	0.990423	564	k__Bacteria;p__Nitrospirae;c__Nitrospira;o__Nitrospirales;f__Nitrospiraceae;g__JG37-AG-70
351	0.117053	0.00237141		0.0232166	0.0246096	0.464602	0.417775	0.222541	0.998631	720	k__Bacteria;p__Proteobacteria;c__Alphaproteobacteria;o__Sphingomonadales;f__Sphingomonadaceae;g__
352	0.117514	0.00237816		0.240131	0.0161745	0.347764	0.091992	0.0987724	0.0477907	514	k__Bacteria;p__Firmicutes;c__Clostridia;o__Clostridiales;f__Ruminococcaceae;g__
353	0.117933	0.00238492		0.564209	0.941885	0.706604	0.618284	0.569918	0.291074	442	k__Bacteria;p__Firmicutes;c__Bacilli;o__Bacillales;f__Paenibacillaceae;__
354	0.119688	0.00239167		0.194353	0.462716	0.845309	0.500919	0.576805	0.975679	568	k__Bacteria;p__OD1;c__SM2F11;o__;f__;g__
355	0.122674	0.00239843		0.614942	0.002578	0.153205	0.135518	0.496578	0.119891	117	k__Bacteria;p__Actinobacteria;c__Actinobacteria;o__Actinomycetales;f__Microbacteriaceae;g__Leucobacter
356	0.123145	0.00240519		0.415776	0.0426302	0.431753	0.147447	0.16946	0.0386027	38	k__Bacteria;p__Acidobacteria;c__DA052;o__E29;f__;g__
357	0.123145	0.00241194		0.415776	0.0426302	0.431753	0.147447	0.16946	0.0386027	736	k__Bacteria;p__Proteobacteria;c__Betaproteobacteria;o__Burkholderiales;f__Alcaligenaceae;g__Sutterella
358	0.12399	0.0024187		0.27789	0.284372	0.405024	0.153917	0.135126	0.0306375	484	k__Bacteria;p__Firmicutes;c__Clostridia;o__Clostridiales;f__Christensenellaceae;g__
359	0.124867	0.00242546		0.0541719	0.941883	0.0203254	0.0425532	0.0200514	0.222087	817	k__Bacteria;p__Proteobacteria;c__Deltaproteobacteria;o__Spirobacillales;f__;g__
360	0.125221	0.00243221		0.165525	0.00595126	0.251415	0.0520533	0.300863	0.998929	220	k__Bacteria;p__BRC1;c__NPL-UPA2;o__;f__;g__
361	0.125221	0.00243897		0.165525	0.00595126	0.251415	0.0520533	0.300863	0.998929	228	k__Bacteria;p__Bacteroidetes;c__Bacteroidia;o__Bacteroidales;f__Marinilabiaceae;g__
362	0.125221	0.00244572		0.165525	0.00595126	0.251415	0.0520533	0.300863	0.998929	237	k__Bacteria;p__Bacteroidetes;c__Bacteroidia;o__Bacteroidales;f__SB-1;g__
363	0.125221	0.00245248		0.165525	0.00595126	0.251415	0.0520533	0.300863	0.998929	284	k__Bacteria;p__Bacteroidetes;c__Flavobacteriia;o__Flavobacteriales;f__Flavobacteriaceae;g__Olleya
364	0.125221	0.00245924		0.165525	0.00595126	0.251415	0.0520533	0.300863	0.998929	430	k__Bacteria;p__Fibrobacteres;c__TG3;o__TG3-1;f__TSCOR003-O20;g__
365	0.125221	0.00246599		0.165525	0.00595126	0.251415	0.0520533	0.300863	0.998929	696	k__Bacteria;p__Proteobacteria;c__Alphaproteobacteria;o__Rhodospirillales;f__Rhodospirillaceae;g__Novispirillum
366	0.125221	0.00247275		0.165525	0.00595126	0.251415	0.0520533	0.300863	0.998929	324	k__Bacteria;p__Chlamydiae;c__Chlamydiia;o__Chlamydiales;f__Waddliaceae;g__Waddlia
367	0.125221	0.0024795		0.165525	0.00595126	0.251415	0.0520533	0.300863	0.998929	913	k__Bacteria;p__SBR1093;c__;o__;f__;g__
368	0.125221	0.00248626		0.165525	0.00595126	0.251415	0.0520533	0.300863	0.998929	589	k__Bacteria;p__Planctomycetes;c__Phycisphaerae;o__Phycisphaerales;__;__
369	0.125221	0.00249302		0.165525	0.00595126	0.251415	0.0520533	0.300863	0.998929	784	k__Bacteria;p__Proteobacteria;c__Deltaproteobacteria;o__Desulfovibrionales;f__Desulfovibrionaceae;g__Desulfovibrio
370	0.125499	0.00249977		0.5249	0.587201	0.10459	0.0945979	0.00503648	0.398418	961	k__Bacteria;p__Verrucomicrobia;c__[Pedosphaerae];o__[Pedosphaerales];f__OPB35;g__
371	0.126544	0.00250653		0.0665342	0.321122	0.461325	0.910689	0.488474	0.591205	804	k__Bacteria;p__Proteobacteria;c__Deltaproteobacteria;o__Myxococcales;f__Myxococcaceae;g__Myxococcus
372	0.127481	0.00251329		0.944545	0.797905	0.486736	0.50197	0.655841	0.816306	246	k__Bacteria;p__Bacteroidetes;c__Cytophagia;o__Cytophagales;f__;g__
373	0.12851	0.00252004		0.0719897	0.441485	0.761908	0.827025	0.473344	0.104228	601	k__Bacteria;p__Planctomycetes;c__Planctomycetia;o__Gemmatales;f__Gemmataceae;__
374	0.12878	0.0025268		0.149668	0.345971	0.978757	0.534741	0.950287	0.0418287	979	k__Bacteria;p__WS3;c__PRR-12;o__Sediment-1;f__PRR-10;g__
375	0.128783	0.00253355		0.788476	0.101718	0.533213	0.362166	0.766299	0.871002	767	k__Bacteria;p__Proteobacteria;c__Betaproteobacteria;o__Nitrosomonadales;f__Nitrosomonadaceae;g__Nitrosovibrio
376	0.129134	0.00254031		0.359815	0.369936	0.581001	0.305353	0.721389	0.530735	492	k__Bacteria;p__Firmicutes;c__Clostridia;o__Clostridiales;f__Clostridiaceae;g__Proteiniclasticum
377	0.131428	0.00254707		0.0546408	0.0490391	0.848377	0.576992	0.975572	0.192242	607	k__Bacteria;p__Planctomycetes;c__Planctomycetia;o__Pirellulales;f__Pirellulaceae;__
378	0.13404	0.00255382		0.0491696	0.484966	0.748286	0.768259	0.669801	0.266512	353	k__Bacteria;p__Chloroflexi;c__Anaerolineae;o__SBR1031;f__oc28;g__
379	0.139035	0.00256058		0.690256	0.222063	0.921454	0.54694	0.598035	0.729566	911	k__Bacteria;p__Proteobacteria;c__TA18;o__CV90;f__;g__
380	0.139047	0.00256733		0.745595	0.751127	0.938482	0.988577	0.829289	0.914106	640	k__Bacteria;p__Proteobacteria;c__Alphaproteobacteria;o__Rhizobiales;f__Brucellaceae;__
381	0.140448	0.00257409		0.208374	0.665186	0.662456	0.984348	0.0239882	0.382714	19	k__Bacteria;p__Acidobacteria;c__;o__;f__;g__
382	0.141499	0.00258085		0.539426	0.0898545	0.795233	0.719111	0.597626	0.932384	668	k__Bacteria;p__Proteobacteria;c__Alphaproteobacteria;o__Rhizobiales;f__Rhizobiaceae;g__Rhizobium
383	0.142142	0.0025876		0.756062	0.731212	0.00314256	0.0156611	1.94088e-05	0.424962	12	k__Archaea;p__Euryarchaeota;c__Thermoplasmata;o__E2;f__;g__
384	0.143839	0.00259436		0.178952	0.0187726	0.36309	0.0942663	0.114093	0.0548577	483	k__Bacteria;p__Firmicutes;c__Clostridia;o__Clostridiales;f__;g__
385	0.145444	0.00260112		0.0493227	0.803204	0.0573944	0.161112	0.0500229	0.810324	893	k__Bacteria;p__Proteobacteria;c__Gammaproteobacteria;o__Xanthomonadales;f__Sinobacteraceae;g__
386	0.146752	0.00260787		0.105662	0.274198	0.181628	0.0178547	0.358674	0.639667	182	k__Bacteria;p__Actinobacteria;c__Actinobacteria;o__Bifidobacteriales;f__;g__
387	0.147026	0.00261463		0.969367	0.218575	0.783511	0.653111	0.876576	0.41046	106	k__Bacteria;p__Actinobacteria;c__Actinobacteria;o__Actinomycetales;f__Intrasporangiaceae;g__Knoellia
388	0.149912	0.00262138		1.7175e-06	0.325961	0.339209	0.220081	0.84431	0.435974	96	k__Bacteria;p__Actinobacteria;c__Actinobacteria;o__Actinomycetales;f__Frankiaceae;g__
389	0.150474	0.00262814		0.927337	0.00202138	0.128748	0.0447252	0.356964	0.31326	87	k__Bacteria;p__Actinobacteria;c__Actinobacteria;o__Actinomycetales;f__Cellulomonadaceae;g__Demequina
390	0.151234	0.0026349		0.264116	0.0793513	0.0136196	0.0288578	0.0108276	0.267352	205	k__Bacteria;p__Actinobacteria;c__Thermoleophilia;o__Solirubrobacterales;f__Solirubrobacteraceae;__
391	0.151626	0.00264165		0.430622	0.0495962	0.446406	0.160629	0.183305	0.0451539	820	k__Bacteria;p__Proteobacteria;c__Deltaproteobacteria;o__[Entotheonellales];f__[Entotheonellaceae];__
392	0.153804	0.00264841		0.09291	0.38087	0.02844	0.020144	0.077512	0.45967	189	k__Bacteria;p__Actinobacteria;c__Nitriliruptoria;o__Euzebyales;f__Euzebyaceae;g__Euzebya
393	0.157552	0.00265516		0.0433119	0.0239278	0.911827	0.728728	0.687196	0.945782	943	k__Bacteria;p__Verrucomicrobia;c__Opitutae;o__Opitutales;f__Opitutaceae;g__
394	0.161119	0.00266192		0.717188	0.24952	0.0727388	0.107553	0.153518	0.23571	649	k__Bacteria;p__Proteobacteria;c__Alphaproteobacteria;o__Rhizobiales;f__Hyphomicrobiaceae;g__Rhodobium
395	0.161236	0.00266868		0.0121353	0.338742	0.000249528	0.0677709	0.0959611	0.00188619	163	k__Bacteria;p__Actinobacteria;c__Actinobacteria;o__Actinomycetales;f__Pseudonocardiaceae;g__Pseudonocardia
396	0.162673	0.00267543		0.446545	0.0091398	0.580793	0.966125	0.498639	0.349856	827	k__Bacteria;p__Proteobacteria;c__Gammaproteobacteria;o__Aeromonadales;f__Aeromonadaceae;g__Oceanisphaera
397	0.166655	0.00268219		0.0949592	0.136234	0.756331	0.810196	0.554777	0.31423	103	k__Bacteria;p__Actinobacteria;c__Actinobacteria;o__Actinomycetales;f__Gordoniaceae;g__Gordonia
398	0.168923	0.00268895		0.000255827	0.15346	0.694963	0.667969	0.963104	0.581968	213	k__Bacteria;p__Armatimonadetes;c__SHA-37;o__;f__;g__
399	0.169965	0.0026957		0.303385	0.791325	0.874444	0.434126	0.378612	0.141354	374	k__Bacteria;p__Chloroflexi;c__Ellin6529;o__;f__;g__
400	0.170017	0.00270246		0.492403	0.40282	0.0927536	0.0114063	0.341052	0.331456	615	k__Bacteria;p__Proteobacteria;__;__;__;__
401	0.170739	0.00270921		0.54435	0.136691	0.12464	0.0253909	0.214487	0.261259	873	k__Bacteria;p__Proteobacteria;c__Gammaproteobacteria;o__Legionellales;f__Legionellaceae;g__Tatlockia
402	0.173352	0.00271597		0.00425429	6.33106e-06	0.00980367	0.000392677	0.133037	0.0318701	64	k__Bacteria;p__Actinobacteria;c__Acidimicrobiia;o__Acidimicrobiales;f__C111;g__
403	0.173504	0.00272273		0.383115	0.421818	0.200768	0.505167	0.0513115	0.991031	758	k__Bacteria;p__Proteobacteria;c__Betaproteobacteria;o__MND1;f__;g__
404	0.173738	0.00272948		0.266174	0.0277931	0.498429	0.16653	0.210219	0.0773445	516	k__Bacteria;p__Firmicutes;c__Clostridia;o__Clostridiales;f__Ruminococcaceae;g__Oscillospira
405	0.174818	0.00273624		0.483685	0.488364	0.0178313	0.038025	0.0324451	0.538162	707	k__Bacteria;p__Proteobacteria;c__Alphaproteobacteria;o__Rickettsiales;f__mitochondria;g__
406	0.176454	0.00274299		0.121815	0.706839	0.0476361	0.0131115	0.352871	0.0293157	265	k__Bacteria;p__Bacteroidetes;c__Cytophagia;o__Cytophagales;f__[Amoebophilaceae];g__Candidatus Amoebophilus
407	0.176829	0.00274975		0.0603536	0.86503	0.998566	0.725604	0.720389	0.644218	518	k__Bacteria;p__Firmicutes;c__Clostridia;o__Clostridiales;f__Symbiobacteriaceae;g__Symbiobacterium
408	0.177367	0.00275651		0.895725	0.707793	0.000756938	0.000339111	0.00119722	0.412328	970	k__Bacteria;p__Verrucomicrobia;c__[Spartobacteria];o__[Chthoniobacterales];f__[Chthoniobacteraceae];g__DA101
409	0.177453	0.00276326		0.563273	0.476858	0.889902	0.843411	0.78128	0.592928	661	k__Bacteria;p__Proteobacteria;c__Alphaproteobacteria;o__Rhizobiales;f__Phyllobacteriaceae;g__Chelativorans
410	0.177509	0.00277002		0.585083	0.198641	0.292464	0.47003	0.287827	0.99695	797	k__Bacteria;p__Proteobacteria;c__Deltaproteobacteria;o__Myxococcales;f__Cystobacteraceae;g__Cystobacter
411	0.182311	0.00277678		0.783828	0.644467	0.685303	0.690585	0.654387	0.865958	477	k__Bacteria;p__Firmicutes;c__Bacilli;o__Lactobacillales;f__Streptococcaceae;g__Lactococcus
412	0.18271	0.00278353		0.0273442	0.107794	0.862962	0.439475	0.442516	0.0742659	679	k__Bacteria;p__Proteobacteria;c__Alphaproteobacteria;o__Rhodobacterales;f__Rhodobacteraceae;g__Amaricoccus
413	0.182877	0.00279029		0.145216	0.715208	0.00224452	0.00376525	0.149223	0.493173	856	k__Bacteria;p__Proteobacteria;c__Gammaproteobacteria;o__Enterobacteriales;f__Enterobacteriaceae;g__Escherichia
414	0.182989	0.00279704		0.338692	0.0418768	0.493702	0.174913	0.186199	0.0619082	933	k__Bacteria;p__Tenericutes;c__Mollicutes;o__Anaeroplasmatales;f__Anaeroplasmataceae;g__Anaeroplasma
415	0.183832	0.0028038		0.09042	0.0421189	0.501341	0.192131	0.190857	0.0245086	502	k__Bacteria;p__Firmicutes;c__Clostridia;o__Clostridiales;f__Lachnospiraceae;g__Coprococcus
416	0.184704	0.00281056		0.245532	0.0161037	0.606479	0.192472	0.169165	0.0961129	234	k__Bacteria;p__Bacteroidetes;c__Bacteroidia;o__Bacteroidales;f__Prevotellaceae;g__Prevotella
417	0.18552	0.00281731		0.266262	0.104707	0.00105618	1.00065e-05	0.0294457	0.908087	618	k__Bacteria;p__Proteobacteria;c__Alphaproteobacteria;o__;f__;g__
418	0.187136	0.00282407		0.695235	0.0470204	0.296246	0.191405	0.35068	0.759347	133	k__Bacteria;p__Actinobacteria;c__Actinobacteria;o__Actinomycetales;f__Micromonosporaceae;g__Micromonospora
419	0.187714	0.00283082		0.423712	0.0217819	0.441917	0.13626	0.124866	0.126607	951	k__Bacteria;p__Verrucomicrobia;c__Verrucomicrobiae;o__Verrucomicrobiales;f__Verrucomicrobiaceae;g__Akkermansia
420	0.189207	0.00283758		0.704555	0.0323631	0.000977573	0.00086243	0.000127829	0.238377	733	k__Bacteria;p__Proteobacteria;c__Betaproteobacteria;o__Burkholderiales;f__Alcaligenaceae;g__Achromobacter
421	0.194625	0.00284434		0.545027	0.876014	0.00812666	0.0488919	0.000694647	0.000846841	759	k__Bacteria;p__Proteobacteria;c__Betaproteobacteria;o__Methylophilales;__;__
422	0.195062	0.00285109		0.812923	0.0781771	0.00671201	0.00507541	0.220002	0.00490301	715	k__Bacteria;p__Proteobacteria;c__Alphaproteobacteria;o__Sphingomonadales;f__;g__
423	0.195186	0.00285785		0.241918	0.919702	0.59206	0.13248	0.867655	0.720779	904	k__Bacteria;p__Proteobacteria;c__Gammaproteobacteria;o__Xanthomonadales;f__Xanthomonadaceae;g__Luteimonas
424	0.196363	0.0028646		0.586526	0.533717	0.74549	0.820764	0.660497	0.477675	955	k__Bacteria;p__Verrucomicrobia;c__[Methylacidiphilae];o__S-BQ2-57;f__;g__
425	0.196549	0.00287136		0.0597827	0.534334	0.0220021	0.107892	0.00434052	0.0283103	872	k__Bacteria;p__Proteobacteria;c__Gammaproteobacteria;o__Legionellales;f__Legionellaceae;g__Legionella
426	0.19686	0.00287812		0.324055	0.780243	0.201347	0.382418	0.78112	0.516336	775	k__Bacteria;p__Proteobacteria;c__Deltaproteobacteria;__;__;__
427	0.199819	0.00288487		0.295136	0.00887724	0.410783	0.732455	0.682252	0.181689	152	k__Bacteria;p__Actinobacteria;c__Actinobacteria;o__Actinomycetales;f__Nocardiopsaceae;g__
428	0.200092	0.00289163		0.284499	0.711486	0.0104906	0.00626847	0.000212709	0.92889	485	k__Bacteria;p__Firmicutes;c__Clostridia;o__Clostridiales;f__Clostridiaceae;__
429	0.203508	0.00289839		0.120263	0.158753	0.735575	0.438227	0.535636	0.0664885	909	k__Bacteria;p__Proteobacteria;c__Gammaproteobacteria;o__Xanthomonadales;f__Xanthomonadaceae;g__Thermomonas
430	0.204007	0.00290514		0.365675	0.520243	0.00270912	0.009517	0.070461	0.617286	811	k__Bacteria;p__Proteobacteria;c__Deltaproteobacteria;o__Myxococcales;f__Polyangiaceae;g__Chondromyces
431	0.208148	0.0029119		0.619936	0.661698	0.639673	0.751863	0.50167	0.0109725	114	k__Bacteria;p__Actinobacteria;c__Actinobacteria;o__Actinomycetales;f__Microbacteriaceae;g__Agromyces
432	0.209348	0.00291865		0.211979	0.573134	0.145715	0.14479	0.809829	0.161309	905	k__Bacteria;p__Proteobacteria;c__Gammaproteobacteria;o__Xanthomonadales;f__Xanthomonadaceae;g__Lysobacter
433	0.210884	0.00292541		0.042182	0.489123	0.503042	0.303573	0.189399	0.0624345	610	k__Bacteria;p__Planctomycetes;c__Planctomycetia;o__Pirellulales;f__Pirellulaceae;g__Pirellula
434	0.213926	0.00293217		0.857645	0.51456	0.336729	0.476934	0.280381	0.290211	801	k__Bacteria;p__Proteobacteria;c__Deltaproteobacteria;o__Myxococcales;f__Myxococcaceae;__
435	0.214468	0.00293892		0.324441	0.170048	0.509339	0.490435	0.102155	0.430711	656	k__Bacteria;p__Proteobacteria;c__Alphaproteobacteria;o__Rhizobiales;f__Methylocystaceae;g__Methylosinus
436	0.21625	0.00294568		0.000294353	0.00832188	0.512022	0.421445	0.58564	0.295363	511	k__Bacteria;p__Firmicutes;c__Clostridia;o__Clostridiales;f__Peptostreptococcaceae;g__
437	0.216455	0.00295243		0.587667	0.493444	0.0419322	0.0869399	0.00285592	0.114175	70	k__Bacteria;p__Actinobacteria;c__Acidimicrobiia;o__Acidimicrobiales;f__koll13;g__
438	0.218889	0.00295919		0.0214773	0.345545	0.799372	0.419508	0.428867	0.604941	977	k__Bacteria;p__WS3;c__PRR-12;o__Sediment-1;f__;g__
439	0.222585	0.00296595		0.343581	0.0385122	0.416729	0.161765	0.539451	0.6625	708	k__Bacteria;p__Proteobacteria;c__Alphaproteobacteria;o__Rickettsiales;f__mitochondria;g__Acanthamoeba
440	0.224708	0.0029727		0.23292	0.153848	0.0237323	0.0315792	0.000624624	0.255289	663	k__Bacteria;p__Proteobacteria;c__Alphaproteobacteria;o__Rhizobiales;f__Phyllobacteriaceae;g__Phyllobacterium
441	0.228641	0.00297946		0.738273	0.00993712	0.0909441	0.157223	0.135687	0.209628	391	k__Bacteria;p__Chloroflexi;c__TK17;o__;f__;g__
442	0.228852	0.00298622		0.7841	0.147238	0.703548	0.490715	0.377179	0.389638	685	k__Bacteria;p__Proteobacteria;c__Alphaproteobacteria;o__Rhodospirillales;__;__
443	0.229012	0.00299297		0.553427	0.737177	0.718405	0.644513	0.401546	0.49742	34	k__Bacteria;p__Acidobacteria;c__Acidobacteriia;o__Acidobacteriales;f__Koribacteraceae;g__Candidatus Koribacter
444	0.234088	0.00299973		0.680967	0.538725	0.721148	0.466323	0.509962	0.340295	460	k__Bacteria;p__Firmicutes;c__Bacilli;o__Bacillales;f__Thermoactinomycetaceae;g__Shimazuella
445	0.23418	0.00300648		0.614026	0.754314	0.980668	0.894536	0.782455	0.321534	354	k__Bacteria;p__Chloroflexi;c__Anaerolineae;o__SJA-15;f__;g__
446	0.235579	0.00301324		0.132118	0.639803	0.780856	0.955714	0.610498	0.300628	491	k__Bacteria;p__Firmicutes;c__Clostridia;o__Clostridiales;f__Clostridiaceae;g__Oxobacter
447	0.237243	0.00302		0.766528	0.126153	2.50965e-06	2.34032e-05	0.000215883	0.111064	212	k__Bacteria;p__Armatimonadetes;c__OPB50;o__;f__;g__
448	0.238043	0.00302675		0.00447008	0.596865	0.959001	0.41775	0.913054	0.778033	750	k__Bacteria;p__Proteobacteria;c__Betaproteobacteria;o__Burkholderiales;f__Oxalobacteraceae;g__
449	0.240294	0.00303351		0.794851	0.839738	0.879375	0.902077	0.868303	0.693169	309	k__Bacteria;p__Bacteroidetes;c__[Saprospirae];o__[Saprospirales];f__Chitinophagaceae;g__Chitinophaga
450	0.241453	0.00304026		3.56033e-13	0.00180926	0.950054	0.856978	0.949124	0.367481	654	k__Bacteria;p__Proteobacteria;c__Alphaproteobacteria;o__Rhizobiales;f__Methylocystaceae;g__
451	0.241548	0.00304702		0.0684492	0.147763	0.0889989	0.0457684	0.21575	0.79599	619	k__Bacteria;p__Proteobacteria;c__Alphaproteobacteria;o__BD7-3;f__;g__
452	0.24156	0.00305378		0.315802	0.462613	0.905153	0.892998	0.588536	0.167516	691	k__Bacteria;p__Proteobacteria;c__Alphaproteobacteria;o__Rhodospirillales;f__Rhodospirillaceae;__
453	0.241938	0.00306053		0.46624	0.240094	0.854524	0.891142	0.591999	0.207495	82	k__Bacteria;p__Actinobacteria;c__Actinobacteria;o__Actinomycetales;f__Bogoriellaceae;g__Georgenia
454	0.242075	0.00306729		0.245846	0.025231	0.247479	0.276556	0.544132	0.0247769	107	k__Bacteria;p__Actinobacteria;c__Actinobacteria;o__Actinomycetales;f__Intrasporangiaceae;g__Phycicoccus
455	0.245682	0.00307405		0.77393	0.580538	0.0117901	0.00471119	0.285533	0.00690738	662	k__Bacteria;p__Proteobacteria;c__Alphaproteobacteria;o__Rhizobiales;f__Phyllobacteriaceae;g__Mesorhizobium
456	0.245905	0.0030808		0.887477	0.000947775	0.943198	0.472691	0.767614	0.00963237	91	k__Bacteria;p__Actinobacteria;c__Actinobacteria;o__Actinomycetales;f__Dermabacteraceae;__
457	0.245905	0.00308756		0.887477	0.000947775	0.943198	0.472691	0.767614	0.00963237	989	k__Bacteria;p__[Thermi];c__Deinococci;o__Thermales;f__Thermaceae;g__Meiothermus
458	0.251153	0.00309431		0.872759	0.113467	0.730074	0.663854	0.867781	0.491906	443	k__Bacteria;p__Firmicutes;c__Bacilli;o__Bacillales;f__Paenibacillaceae;g__
459	0.251759	0.00310107		0.573363	0.663278	0.408819	0.202518	0.177235	0.581576	577	k__Bacteria;p__Planctomycetes;c__028H05-P-BN-P5;o__;f__;g__
460	0.252465	0.00310783		0.906493	0.970373	0.709265	0.35777	0.909833	0.683192	952	k__Bacteria;p__Verrucomicrobia;c__Verrucomicrobiae;o__Verrucomicrobiales;f__Verrucomicrobiaceae;g__Luteolibacter
461	0.252691	0.00311458		0.693626	0.0164247	0.626244	0.474246	0.996792	0.480698	871	k__Bacteria;p__Proteobacteria;c__Gammaproteobacteria;o__Legionellales;f__Legionellaceae;g__
462	0.252838	0.00312134		0.411548	0.144257	0.682473	0.981179	0.714323	0.616884	217	k__Bacteria;p__Armatimonadetes;c__[Fimbriimonadia];o__[Fimbriimonadales];f__[Fimbriimonadaceae];g__
463	0.252921	0.00312809		0.752898	0.729761	0.710496	0.907564	0.835384	0.481999	980	k__Bacteria;p__WS4;c__;o__;f__;g__
464	0.252986	0.00313485		0.91045	0.025651	0.372074	0.387406	0.683289	0.167127	521	k__Bacteria;p__Firmicutes;c__Clostridia;o__Clostridiales;f__Veillonellaceae;g__G07
465	0.256849	0.00314161		0.745074	0.641796	0.016832	0.00125211	0.172225	0.148984	987	k__Bacteria;p__[Thermi];c__Deinococci;o__Deinococcales;f__Trueperaceae;g__B-42
466	0.258162	0.00314836		0.712437	0.976832	0.955972	0.817792	0.594773	0.751486	796	k__Bacteria;p__Proteobacteria;c__Deltaproteobacteria;o__Myxococcales;f__Cystobacteraceae;g__
467	0.259374	0.00315512		0.530852	0.405009	0.98124	0.617572	0.756994	0.424081	16	k__Archaea;p__[Parvarchaeota];c__[Parvarchaea];o__YLA114;f__;g__
468	0.259845	0.00316188		0.57868	0.0304908	0.0710943	0.0313988	0.518714	0.0947019	701	k__Bacteria;p__Proteobacteria;c__Alphaproteobacteria;o__Rickettsiales;f__;g__
469	0.263132	0.00316863		0.736184	0.0230226	0.0431914	0.202122	0.0210079	0.393059	206	k__Bacteria;p__Actinobacteria;c__Thermoleophilia;o__Solirubrobacterales;f__Solirubrobacteraceae;g__
470	0.266471	0.00317539		0.955193	0.280977	0.763548	0.704718	0.774407	0.921185	207	k__Bacteria;p__Actinobacteria;c__Thermoleophilia;o__Solirubrobacterales;f__Solirubrobacteraceae;g__Solirubrobacter
471	0.269397	0.00318214		0.159201	0.0301692	0.700577	0.231979	0.364563	0.0842655	236	k__Bacteria;p__Bacteroidetes;c__Bacteroidia;o__Bacteroidales;f__S24-7;g__
472	0.270312	0.0031889		0.204575	0.0373177	0.597277	0.21368	0.358052	0.0707703	227	k__Bacteria;p__Bacteroidetes;c__Bacteroidia;o__Bacteroidales;f__Bacteroidaceae;g__Bacteroides
473	0.270392	0.00319566		0.721471	0.0100829	0.23965	0.226046	0.432127	0.245748	157	k__Bacteria;p__Actinobacteria;c__Actinobacteria;o__Actinomycetales;f__Propionibacteriaceae;g__
474	0.270392	0.00320241		0.721471	0.0100829	0.23965	0.226046	0.432127	0.245748	289	k__Bacteria;p__Bacteroidetes;c__Flavobacteriia;o__Flavobacteriales;f__[Weeksellaceae];__
475	0.270392	0.00320917		0.721471	0.0100829	0.23965	0.226046	0.432127	0.245748	888	k__Bacteria;p__Proteobacteria;c__Gammaproteobacteria;o__Salinisphaerales;f__Salinisphaeraceae;g__Salinisphaera
476	0.270392	0.00321592		0.721471	0.0100829	0.23965	0.226046	0.432127	0.245748	118	k__Bacteria;p__Actinobacteria;c__Actinobacteria;o__Actinomycetales;f__Microbacteriaceae;g__Pseudoclavibacter
477	0.270392	0.00322268		0.721471	0.0100829	0.23965	0.226046	0.432127	0.245748	641	k__Bacteria;p__Proteobacteria;c__Alphaproteobacteria;o__Rhizobiales;f__Brucellaceae;g__
478	0.270392	0.00322944		0.721471	0.0100829	0.23965	0.226046	0.432127	0.245748	440	k__Bacteria;p__Firmicutes;c__Bacilli;o__Bacillales;f__Bacillaceae;g__Natronobacillus
479	0.273334	0.00323619		0.430853	0.111694	0.38492	0.316592	0.797371	0.0702337	293	k__Bacteria;p__Bacteroidetes;c__Sphingobacteriia;o__Sphingobacteriales;f__NS11-12;g__
480	0.277422	0.00324295		0.000164506	0.00484138	0.937861	0.863332	0.76652	0.325771	794	k__Bacteria;p__Proteobacteria;c__Deltaproteobacteria;o__Myxococcales;f__;g__
481	0.278157	0.00324971		0.262329	0.971173	0.0636486	0.117577	0.00350641	0.83751	860	k__Bacteria;p__Proteobacteria;c__Gammaproteobacteria;o__Enterobacteriales;f__Enterobacteriaceae;g__Yersinia
482	0.27892	0.00325646		0.0134636	0.0268015	0.0503646	0.0385908	0.0514814	0.382794	609	k__Bacteria;p__Planctomycetes;c__Planctomycetia;o__Pirellulales;f__Pirellulaceae;g__A17
483	0.27923	0.00326322		0.20319	0.335757	0.0855168	0.0101571	0.367881	0.429439	940	k__Bacteria;p__Verrucomicrobia;c__Opitutae;o__;f__;g__
484	0.279343	0.00326997		0.306285	0.0315386	0.236066	0.0350563	0.586191	0.24681	267	k__Bacteria;p__Bacteroidetes;c__Flavobacteriia;o__Flavobacteriales;f__;g__
485	0.279358	0.00327673		0.164889	0.484985	0.00107786	0.00156951	0.00396146	0.443433	90	k__Bacteria;p__Actinobacteria;c__Actinobacteria;o__Actinomycetales;f__Cryptosporangiaceae;g__Cryptosporangium
486	0.279641	0.00328349		0.194774	0.812461	0.00284866	0.00896721	0.0652823	0.30726	912	k__Bacteria;p__Proteobacteria;c__TA18;o__PHOS-HD29;f__;g__
487	0.28076	0.00329024		0.415151	0.439465	0.00865229	0.0227941	0.105045	0.830117	142	k__Bacteria;p__Actinobacteria;c__Actinobacteria;o__Actinomycetales;f__Nocardiaceae;g__Rhodococcus
488	0.28277	0.003297		0.606352	0.00912622	0.317046	0.244625	0.428782	0.265214	508	k__Bacteria;p__Firmicutes;c__Clostridia;o__Clostridiales;f__Peptococcaceae;g__Desulfosporosinus
489	0.283712	0.00330375		0.636521	0.921582	6.39739e-08	7.78128e-07	3.50565e-05	0.449291	53	k__Bacteria;p__Acidobacteria;c__[Chloracidobacteria];o__DS-100;f__;g__
490	0.28675	0.00331051		0.481113	0.0742555	0.500664	0.205463	0.22887	0.0740108	244	k__Bacteria;p__Bacteroidetes;c__Bacteroidia;o__Bacteroidales;f__[Paraprevotellaceae];g__[Prevotella]
491	0.28846	0.00331727		0.79847	0.846439	0.695368	0.842239	0.695933	0.868979	320	k__Bacteria;p__Chlamydiae;c__Chlamydiia;o__Chlamydiales;f__Parachlamydiaceae;g__Candidatus Protochlamydia
492	0.293403	0.00332402		0.199685	0.629526	0.928542	0.513594	0.717324	0.0733321	395	k__Bacteria;p__Chloroflexi;c__Thermomicrobia;o__AKYG1722;f__;g__
493	0.295275	0.00333078		0.169658	0.0646748	0.0846289	0.107972	0.825802	0.0101251	288	k__Bacteria;p__Bacteroidetes;c__Flavobacteriia;o__Flavobacteriales;f__Flavobacteriaceae;g__Zhouia
494	0.296099	0.00333754		0.00322302	0.532011	0.861255	0.491835	0.675264	0.366389	390	k__Bacteria;p__Chloroflexi;c__TK10;o__B07_WMSP1;f__FFCH4570;g__
495	0.296853	0.00334429		0.560538	0.474457	0.467135	0.510016	0.435491	0.834153	175	k__Bacteria;p__Actinobacteria;c__Actinobacteria;o__Actinomycetales;f__Thermomonosporaceae;__
496	0.298658	0.00335105		0.159528	0.780797	0.0298852	0.0202329	0.38591	0.455025	437	k__Bacteria;p__Firmicutes;c__Bacilli;o__Bacillales;f__Bacillaceae;g__
497	0.299659	0.0033578		0.000559248	0.000127621	0.550685	0.0693512	0.292761	0.983996	449	k__Bacteria;p__Firmicutes;c__Bacilli;o__Bacillales;f__Planococcaceae;g__Lysinibacillus
498	0.300525	0.00336456		0.108724	0.0152008	0.437454	0.739846	0.153187	0.0811869	249	k__Bacteria;p__Bacteroidetes;c__Cytophagia;o__Cytophagales;f__Cytophagaceae;__
499	0.300687	0.00337132		0.835237	0.70872	0.224829	0.230645	0.246843	0.758284	371	k__Bacteria;p__Chloroflexi;c__Chloroflexi;o__[Roseiflexales];f__[Kouleothrixaceae];__
500	0.303761	0.00337807		0.232111	0.832633	0.335585	0.785677	0.921802	0.201666	651	k__Bacteria;p__Proteobacteria;c__Alphaproteobacteria;o__Rhizobiales;f__Methylobacteriaceae;g__
501	0.30666	0.00338483		0.353781	0.122653	0.0789607	0.0271069	0.0346693	0.0602215	424	k__Bacteria;p__Elusimicrobia;c__Elusimicrobia;o__Elusimicrobiales;f__Elusimicrobiaceae;g__
502	0.307357	0.00339158		0.0787535	0.0448021	0.00870065	0.00674162	0.187662	0.00309175	269	k__Bacteria;p__Bacteroidetes;c__Flavobacteriia;o__Flavobacteriales;f__Cryomorphaceae;g__
503	0.309004	0.00339834		0.295311	0.240307	0.00176551	0.00124925	0.0801646	0.116206	722	k__Bacteria;p__Proteobacteria;c__Alphaproteobacteria;o__Sphingomonadales;f__Sphingomonadaceae;g__Novosphingobium
504	0.310721	0.0034051		0.444783	0.165022	0.684201	0.760777	0.999252	0.92076	616	k__Bacteria;p__Proteobacteria;c__;o__;f__;g__
505	0.312617	0.00341185		0.531326	0.48178	0.0115558	0.00517717	0.167773	0.0158985	891	k__Bacteria;p__Proteobacteria;c__Gammaproteobacteria;o__Thiotrichales;f__Piscirickettsiaceae;g__Methylophaga
506	0.314816	0.00341861		5.00809e-05	0.325463	0.22492	0.22056	0.388525	0.0476047	547	k__Bacteria;p__Gemmatimonadetes;c__Gemmatimonadetes;o__;f__;g__
507	0.316689	0.00342536		0.573331	0.286543	0.159824	0.362735	0.129937	0.657849	660	k__Bacteria;p__Proteobacteria;c__Alphaproteobacteria;o__Rhizobiales;f__Phyllobacteriaceae;g__Aminobacter
508	0.319711	0.00343212		0.886191	0.00666693	0.117147	0.211328	0.836757	0.367659	838	k__Bacteria;p__Proteobacteria;c__Gammaproteobacteria;o__Alteromonadales;f__Alteromonadaceae;g__Microbulbifer
509	0.32232	0.00343888		0.337685	0.591734	0.113917	0.190391	0.533585	0.707169	258	k__Bacteria;p__Bacteroidetes;c__Cytophagia;o__Cytophagales;f__Cytophagaceae;g__Rudanella
510	0.325005	0.00344563		0.65096	0.384665	0.704408	0.653813	0.757486	0.0388732	810	k__Bacteria;p__Proteobacteria;c__Deltaproteobacteria;o__Myxococcales;f__Polyangiaceae;g__
511	0.325788	0.00345239		0.958862	0.00139351	0.881702	0.367715	0.671805	0.00460265	990	k__Bacteria;p__[Thermi];c__Deinococci;o__Thermales;f__Thermaceae;g__Thermus
512	0.327538	0.00345915		0.305262	0.340253	0.880988	0.775852	0.617362	0.563442	526	k__Bacteria;p__Firmicutes;c__Clostridia;o__Clostridiales;f__[Mogibacteriaceae];g__
513	0.328761	0.0034659		0.736172	0.204071	0.0238183	0.0166943	0.243666	0.00816557	172	k__Bacteria;p__Actinobacteria;c__Actinobacteria;o__Actinomycetales;f__Streptosporangiaceae;g__Nonomuraea
514	0.337182	0.00347266		0.706641	0.0246178	0.596007	0.978184	0.625201	0.501602	523	k__Bacteria;p__Firmicutes;c__Clostridia;o__Clostridiales;f__Veillonellaceae;g__Phascolarctobacterium
515	0.337827	0.00347941		0.720444	0.390608	0.954327	0.613404	0.842615	0.362742	776	k__Bacteria;p__Proteobacteria;c__Deltaproteobacteria;o__;f__;g__
516	0.338831	0.00348617		0.432932	0.549595	0.949764	0.681907	0.698919	0.328144	614	k__Bacteria;p__Planctomycetes;c__vadinHA49;o__p04_C01;f__;g__
517	0.341048	0.00349293		0.0135407	0.0720811	0.161042	0.0618972	0.646868	0.186197	286	k__Bacteria;p__Bacteroidetes;c__Flavobacteriia;o__Flavobacteriales;f__Flavobacteriaceae;g__Salinimicrobium
518	0.341575	0.00349968		0.20327	0.13625	0.334857	0.210423	0.095324	0.461443	326	k__Bacteria;p__Chlorobi;c__;o__;f__;g__
519	0.34237	0.00350644		0.667873	0.656644	0.699866	0.834323	0.676884	0.947671	426	k__Bacteria;p__Elusimicrobia;c__Elusimicrobia;o__IIb;f__;g__
520	0.342511	0.00351319		0.487219	0.720568	0.281044	0.114481	0.619722	0.0659137	435	k__Bacteria;p__Firmicutes;c__Bacilli;o__Bacillales;f__Alicyclobacillaceae;g__Alicyclobacillus
521	0.346316	0.00351995		0.568468	0.549668	0.0670209	0.122702	0.296856	0.380914	986	k__Bacteria;p__[Thermi];c__Deinococci;o__Deinococcales;f__Trueperaceae;g__
522	0.346636	0.00352671		0.113336	0.0545489	0.356626	0.0954088	0.200617	0.158024	499	k__Bacteria;p__Firmicutes;c__Clostridia;o__Clostridiales;f__Lachnospiraceae;g__
523	0.34864	0.00353346		0.937486	0.00558177	0.366655	0.165446	0.727805	0.545975	433	k__Bacteria;p__Firmicutes;c__Bacilli;o__Bacillales;__;__
524	0.354033	0.00354022		0.654278	0.539282	0.579529	0.65095	0.946616	0.277585	814	k__Bacteria;p__Proteobacteria;c__Deltaproteobacteria;o__NB1-j;f__MND4;g__
525	0.35579	0.00354698		0.0106052	0.292895	0.580969	0.83794	0.715933	0.970522	960	k__Bacteria;p__Verrucomicrobia;c__[Pedosphaerae];o__[Pedosphaerales];f__Ellin517;g__
526	0.355859	0.00355373		0.399324	0.49468	0.690335	0.478159	0.48106	0.571532	798	k__Bacteria;p__Proteobacteria;c__Deltaproteobacteria;o__Myxococcales;f__Cystobacterineae;g__
527	0.362418	0.00356049		0.1166	0.362568	0.520467	0.415249	0.510153	0.872803	232	k__Bacteria;p__Bacteroidetes;c__Bacteroidia;o__Bacteroidales;f__Porphyromonadaceae;g__Parabacteroides
528	0.366121	0.00356724		5.51482e-09	0.934944	0.966847	0.379111	0.700276	0.99393	549	k__Bacteria;p__Gemmatimonadetes;c__Gemmatimonadetes;o__Ellin5290;f__;g__
529	0.370006	0.003574		0.93345	0.0383613	0.496975	0.567835	0.951271	0.117048	835	k__Bacteria;p__Proteobacteria;c__Gammaproteobacteria;o__Alteromonadales;f__Alteromonadaceae;g__Glaciecola
530	0.370671	0.00358076		0.588353	0.983851	0.0261437	0.0476068	0.160095	0.525027	397	k__Bacteria;p__Chloroflexi;c__Thermomicrobia;o__Sphaerobacterales;f__;g__
531	0.370969	0.00358751		0.700372	0.234239	0.168362	0.164622	0.182384	0.159695	169	k__Bacteria;p__Actinobacteria;c__Actinobacteria;o__Actinomycetales;f__Streptomycetaceae;g__
532	0.371818	0.00359427		0.203904	0.0635973	0.265437	0.0489907	0.288461	0.98654	351	k__Bacteria;p__Chloroflexi;c__Anaerolineae;o__SBR1031;f__SHA-31;g__
533	0.373632	0.00360102		0.648439	0.248563	0.039742	0.0748242	0.00489342	0.00842245	682	k__Bacteria;p__Proteobacteria;c__Alphaproteobacteria;o__Rhodobacterales;f__Rhodobacteraceae;g__Rhodobacter
534	0.37553	0.00360778		5.9555e-06	0.205817	0.0667749	0.158974	0.576801	0.049667	897	k__Bacteria;p__Proteobacteria;c__Gammaproteobacteria;o__Xanthomonadales;f__Xanthomonadaceae;__
535	0.376652	0.00361454		0.506628	0.921339	0.00414619	0.00217813	0.0965659	0.00238789	647	k__Bacteria;p__Proteobacteria;c__Alphaproteobacteria;o__Rhizobiales;f__Hyphomicrobiaceae;g__Parvibaculum
536	0.383033	0.00362129		0.220548	0.0343989	0.417368	0.215027	0.180467	0.399806	402	k__Bacteria;p__Cyanobacteria;c__4C0d-2;o__YS2;f__;g__
537	0.388788	0.00362805		0.891247	0.843686	0.295293	0.433652	0.0958951	0.865287	959	k__Bacteria;p__Verrucomicrobia;c__[Pedosphaerae];o__[Pedosphaerales];f__Ellin515;g__
538	0.396527	0.00363481		0.968616	0.62067	0.0955198	0.142891	0.0861145	0.359713	78	k__Bacteria;p__Actinobacteria;c__Actinobacteria;o__Actinomycetales;f__Actinosynnemataceae;g__
539	0.398647	0.00364156		0.049454	0.436079	0.401583	0.489012	0.832457	0.0584304	643	k__Bacteria;p__Proteobacteria;c__Alphaproteobacteria;o__Rhizobiales;f__Hyphomicrobiaceae;__
540	0.399984	0.00364832		0.0236027	0.140776	0.582871	0.31774	0.995682	0.0235489	396	k__Bacteria;p__Chloroflexi;c__Thermomicrobia;o__JG30-KF-CM45;f__;g__
541	0.400506	0.00365507		0.180135	0.0248446	0.717439	0.315572	0.265573	0.248975	534	k__Bacteria;p__Firmicutes;c__Erysipelotrichi;o__Erysipelotrichales;f__Erysipelotrichaceae;g__RFN20
542	0.406239	0.00366183		6.35085e-05	0.388668	0.0194438	0.0451163	0.0135837	0.0290219	149	k__Bacteria;p__Actinobacteria;c__Actinobacteria;o__Actinomycetales;f__Nocardioidaceae;g__Nocardioides
543	0.406868	0.00366859		0.887996	0.341162	0.928332	0.997636	0.74618	0.538426	595	k__Bacteria;p__Planctomycetes;c__Phycisphaerae;o__mle1-8;f__;g__
544	0.407603	0.00367534		0.954632	0.821524	0.00720978	0.0087198	1.57152e-05	0.998697	3	k__Archaea;p__Crenarchaeota;c__MBGA;o__;f__;g__
545	0.407603	0.0036821		0.954632	0.821524	0.00720978	0.0087198	1.57152e-05	0.998697	327	k__Bacteria;p__Chlorobi;c__BSV26;o__A89;f__;g__
546	0.407603	0.00368885		0.954632	0.821524	0.00720978	0.0087198	1.57152e-05	0.998697	862	k__Bacteria;p__Proteobacteria;c__Gammaproteobacteria;o__HTCC2188;f__;g__
547	0.407603	0.00369561		0.954632	0.821524	0.00720978	0.0087198	1.57152e-05	0.998697	962	k__Bacteria;p__Verrucomicrobia;c__[Pedosphaerae];o__[Pedosphaerales];f__[Pedosphaeraceae];g__Pedosphaera
548	0.411586	0.00370237		0.995541	0.823728	0.209315	0.207432	0.454995	0.0804064	294	k__Bacteria;p__Bacteroidetes;c__Sphingobacteriia;o__Sphingobacteriales;f__Sphingobacteriaceae;__
549	0.413688	0.00370912		5.93063e-10	0.875403	0.800882	0.73085	0.985409	0.585126	434	k__Bacteria;p__Firmicutes;c__Bacilli;o__Bacillales;f__;g__
550	0.413811	0.00371588		0.84915	0.358456	0.905418	0.981217	0.971746	0.730917	976	k__Bacteria;p__WS3;c__PRR-12;o__LD1-PA13;f__;g__
551	0.414699	0.00372264		0.956408	0.287396	0.0100795	0.000311908	0.0513199	0.0858353	222	k__Bacteria;p__Bacteroidetes;__;__;__;__
552	0.417202	0.00372939		0.0350282	0.70956	0.570026	0.283714	0.914744	0.626022	463	k__Bacteria;p__Firmicutes;c__Bacilli;o__Lactobacillales;f__Aerococcaceae;__
553	0.417255	0.00373615		0.00239272	0.821704	0.650995	0.898893	0.690732	0.175049	771	k__Bacteria;p__Proteobacteria;c__Betaproteobacteria;o__Rhodocyclales;f__Rhodocyclaceae;g__Uliginosibacterium
554	0.417743	0.0037429		0.76728	0.641884	0.94197	0.934436	0.601726	0.949035	253	k__Bacteria;p__Bacteroidetes;c__Cytophagia;o__Cytophagales;f__Cytophagaceae;g__Dyadobacter
555	0.420979	0.00374966		0.146842	0.0579602	0.195499	0.0255895	0.225232	0.878119	337	k__Bacteria;p__Chloroflexi;c__Anaerolineae;o__Anaerolineales;f__Anaerolinaceae;g__
556	0.426219	0.00375642		0.982999	0.629808	0.341332	0.290739	0.394518	0.439564	752	k__Bacteria;p__Proteobacteria;c__Betaproteobacteria;o__Burkholderiales;f__Oxalobacteraceae;g__Janthinobacterium
557	0.426644	0.00376317		0.0208333	0.490761	0.295001	0.94611	0.676691	0.995571	799	k__Bacteria;p__Proteobacteria;c__Deltaproteobacteria;o__Myxococcales;f__Haliangiaceae;g__
558	0.427944	0.00376993		0.0593221	0.0645677	0.844648	0.413341	0.968941	0.169118	377	k__Bacteria;p__Chloroflexi;c__Ktedonobacteria;o__Ktedonobacterales;f__Ktedonobacteraceae;g__
559	0.430673	0.00377668		6.70012e-05	0.880211	0.142806	0.0794942	0.346934	0.800201	791	k__Bacteria;p__Proteobacteria;c__Deltaproteobacteria;o__MIZ46;f__;g__
560	0.433851	0.00378344		0.581101	0.563195	0.576991	0.965558	0.874385	0.734094	574	k__Bacteria;p__OP3;c__koll11;o__;f__;g__
561	0.434531	0.0037902		0.0693487	0.149337	0.00753789	0.00294923	0.12694	0.083812	898	k__Bacteria;p__Proteobacteria;c__Gammaproteobacteria;o__Xanthomonadales;f__Xanthomonadaceae;g__
562	0.437885	0.00379695		0.195794	0.191639	0.0630602	0.0449071	0.431668	0.28919	278	k__Bacteria;p__Bacteroidetes;c__Flavobacteriia;o__Flavobacteriales;f__Flavobacteriaceae;g__Arenibacter
563	0.438125	0.00380371		0.000801944	0.897081	0.922655	0.661151	0.557793	0.781323	705	k__Bacteria;p__Proteobacteria;c__Alphaproteobacteria;o__Rickettsiales;f__Rickettsiaceae;g__Rickettsia
564	0.439603	0.00381047		4.54458e-05	0.0846838	0.90383	0.661063	0.969325	0.852906	479	k__Bacteria;p__Firmicutes;c__Bacilli;o__Turicibacterales;f__Turicibacteraceae;g__Turicibacter
565	0.439623	0.00381722		0.0038947	0.645481	0.320327	0.253295	0.177264	0.458572	727	k__Bacteria;p__Proteobacteria;c__Betaproteobacteria;o__;f__;g__
566	0.439648	0.00382398		0.0379114	0.0617901	0.194854	0.362158	0.928515	0.339107	83	k__Bacteria;p__Actinobacteria;c__Actinobacteria;o__Actinomycetales;f__Brevibacteriaceae;g__Brevibacterium
567	0.441211	0.00383073		0.382455	0.0404908	0.0450643	0.046195	0.344067	0.0194554	297	k__Bacteria;p__Bacteroidetes;c__Sphingobacteriia;o__Sphingobacteriales;f__Sphingobacteriaceae;g__Parapedobacter
568	0.445029	0.00383749		0.776244	0.0677761	0.853968	0.982791	0.717544	0.8397	578	k__Bacteria;p__Planctomycetes;c__;o__;f__;g__
569	0.446453	0.00384425		0.41349	0.466494	0.823355	0.585437	0.818527	0.912665	793	k__Bacteria;p__Proteobacteria;c__Deltaproteobacteria;o__Myxococcales;f__0319-6G20;g__
570	0.4479	0.003851		0.300728	0.0245112	0.0859483	0.096479	0.794642	0.0153074	314	k__Bacteria;p__Bacteroidetes;c__[Saprospirae];o__[Saprospirales];f__Saprospiraceae;g__
571	0.449898	0.00385776		0.372406	0.865733	0.419362	0.893713	0.609003	0.812573	340	k__Bacteria;p__Chloroflexi;c__Anaerolineae;o__CFB-26;f__;g__
572	0.44993	0.00386451		0.000131404	0.17161	0.163891	0.375119	0.721193	0.0634356	113	k__Bacteria;p__Actinobacteria;c__Actinobacteria;o__Actinomycetales;f__Microbacteriaceae;g__
573	0.451689	0.00387127		0.0181587	0.760966	0.0234511	0.00909243	0.0532401	0.43056	197	k__Bacteria;p__Actinobacteria;c__Thermoleophilia;o__Gaiellales;f__AK1AB1_02E;g__
574	0.452752	0.00387803		0.493329	0.57029	0.0304453	0.00766188	0.20905	0.104397	848	k__Bacteria;p__Proteobacteria;c__Gammaproteobacteria;o__Chromatiales;f__;g__
575	0.453104	0.00388478		0.058456	0.814462	0.00975341	0.00733396	0.0688996	0.741142	969	k__Bacteria;p__Verrucomicrobia;c__[Spartobacteria];o__[Chthoniobacterales];f__[Chthoniobacteraceae];g__Chthoniobacter
576	0.456406	0.00389154		0.182481	0.294875	0.576965	0.737703	0.961238	0.790623	368	k__Bacteria;p__Chloroflexi;c__Chloroflexi;o__Herpetosiphonales;f__;g__
577	0.456981	0.0038983		0.656703	0.984567	0.439126	0.453183	0.894127	0.809348	23	k__Bacteria;p__Acidobacteria;c__Acidobacteria-6;__;__;__
578	0.458884	0.00390505		0.173312	0.439988	0.348824	0.338527	0.264665	0.985409	713	k__Bacteria;p__Proteobacteria;c__Alphaproteobacteria;o__Rickettsiales;f__mitochondria;g__Vermamoeba
579	0.460397	0.00391181		0.93741	0.774277	0.27498	0.1348	0.553453	0.344325	254	k__Bacteria;p__Bacteroidetes;c__Cytophagia;o__Cytophagales;f__Cytophagaceae;g__Hymenobacter
580	0.469528	0.00391856		0.375656	0.0538134	0.207377	0.193409	0.467842	0.646845	812	k__Bacteria;p__Proteobacteria;c__Deltaproteobacteria;o__Myxococcales;f__Polyangiaceae;g__Sorangium
581	0.469623	0.00392532		0.363608	0.463129	0.774521	0.493326	0.4179	0.724656	566	k__Bacteria;p__OD1;c__;o__;f__;g__
582	0.474466	0.00393208		0.376944	0.493436	0.895714	0.865764	0.964903	0.737222	753	k__Bacteria;p__Proteobacteria;c__Betaproteobacteria;o__Burkholderiales;f__Oxalobacteraceae;g__Massilia
583	0.475062	0.00393883		0.514202	0.793711	0.910724	0.957224	0.736166	0.394985	586	k__Bacteria;p__Planctomycetes;c__Phycisphaerae;o__AKAU3564;f__;g__
584	0.478182	0.00394559		0.343877	0.120147	0.534069	0.250579	0.261945	0.110704	936	k__Bacteria;p__Tenericutes;c__Mollicutes;o__RF39;f__;g__
585	0.478204	0.00395234		0.282737	0.0875971	0.695727	0.280715	0.493033	0.118139	235	k__Bacteria;p__Bacteroidetes;c__Bacteroidia;o__Bacteroidales;f__Rikenellaceae;g__
586	0.479161	0.0039591		0.546199	0.132738	0.559882	0.282715	0.308264	0.125065	495	k__Bacteria;p__Firmicutes;c__Clostridia;o__Clostridiales;f__Dehalobacteriaceae;g__
587	0.479161	0.00396586		0.546199	0.132738	0.559882	0.282715	0.308264	0.125065	432	k__Bacteria;p__Firmicutes;c__AHT28;o__;f__;g__
588	0.479161	0.00397261		0.546199	0.132738	0.559882	0.282715	0.308264	0.125065	510	k__Bacteria;p__Firmicutes;c__Clostridia;o__Clostridiales;f__Peptococcaceae;g__rc4-4
589	0.479161	0.00397937		0.546199	0.132738	0.559882	0.282715	0.308264	0.125065	629	k__Bacteria;p__Proteobacteria;c__Alphaproteobacteria;o__Kiloniellales;f__;g__
590	0.479161	0.00398612		0.546199	0.132738	0.559882	0.282715	0.308264	0.125065	630	k__Bacteria;p__Proteobacteria;c__Alphaproteobacteria;o__RF32;f__;g__
591	0.479161	0.00399288		0.546199	0.132738	0.559882	0.282715	0.308264	0.125065	698	k__Bacteria;p__Proteobacteria;c__Alphaproteobacteria;o__Rhodospirillales;f__Rhodospirillaceae;g__Rhodovibrio
592	0.479161	0.00399964		0.546199	0.132738	0.559882	0.282715	0.308264	0.125065	859	k__Bacteria;p__Proteobacteria;c__Gammaproteobacteria;o__Enterobacteriales;f__Enterobacteriaceae;g__Serratia
593	0.479161	0.00400639		0.546199	0.132738	0.559882	0.282715	0.308264	0.125065	935	k__Bacteria;p__Tenericutes;c__Mollicutes;o__Mycoplasmatales;f__Mycoplasmataceae;g__
594	0.479161	0.00401315		0.546199	0.132738	0.559882	0.282715	0.308264	0.125065	71	k__Bacteria;p__Actinobacteria;c__Acidimicrobiia;o__Acidimicrobiales;f__wb1_P06;g__
595	0.479161	0.00401991		0.546199	0.132738	0.559882	0.282715	0.308264	0.125065	349	k__Bacteria;p__Chloroflexi;c__Anaerolineae;o__SB-34;f__;g__
596	0.479161	0.00402666		0.546199	0.132738	0.559882	0.282715	0.308264	0.125065	558	k__Bacteria;p__NC10;c__wb1-A12;o__;f__;g__
597	0.480524	0.00403342		5.69694e-14	0.665776	0.647043	0.241102	0.696676	0.225477	628	k__Bacteria;p__Proteobacteria;c__Alphaproteobacteria;o__Ellin329;f__;g__
598	0.482289	0.00404017		0.307812	0.145487	0.295198	0.098061	0.156686	0.143733	387	k__Bacteria;p__Chloroflexi;c__TK10;o__AKYG885;f__Dolo_23;g__
599	0.482298	0.00404693		0.901524	0.0253904	0.768086	0.645999	0.678891	0.213322	653	k__Bacteria;p__Proteobacteria;c__Alphaproteobacteria;o__Rhizobiales;f__Methylocystaceae;__
600	0.483572	0.00405369		0.40547	0.947903	0.777245	0.490098	0.464897	0.547224	400	k__Bacteria;p__Cyanobacteria;c__4C0d-2;o__MLE1-12;f__;g__
601	0.485384	0.00406044		0.241513	0.92792	0.883419	0.953193	0.804847	0.437101	870	k__Bacteria;p__Proteobacteria;c__Gammaproteobacteria;o__Legionellales;f__Legionellaceae;__
602	0.485642	0.0040672		0.57439	0.340602	0.823754	0.538423	0.552289	0.912238	507	k__Bacteria;p__Firmicutes;c__Clostridia;o__Clostridiales;f__Peptococcaceae;g__
603	0.486099	0.00407395		0.93906	0.792719	0.744743	0.851448	0.332271	0.405141	62	k__Bacteria;p__Actinobacteria;c__Acidimicrobiia;o__Acidimicrobiales;f__AKIW874;g__
604	0.490744	0.00408071		0.000600702	0.177512	0.818124	0.830933	0.350677	0.408274	896	k__Bacteria;p__Proteobacteria;c__Gammaproteobacteria;o__Xanthomonadales;f__Sinobacteraceae;g__Steroidobacter
605	0.491969	0.00408747		0.4281	0.0624065	0.943602	0.56101	0.498816	0.146385	241	k__Bacteria;p__Bacteroidetes;c__Bacteroidia;o__Bacteroidales;f__[Paraprevotellaceae];g__
606	0.495871	0.00409422		0.0176541	0.87465	0.754835	0.751142	0.91331	0.00359612	414	k__Bacteria;p__Cyanobacteria;c__Nostocophycideae;o__Nostocales;f__Nostocaceae;g__
607	0.496129	0.00410098		0.558438	0.273193	0.000291353	0.00164815	0.00359025	0.220844	131	k__Bacteria;p__Actinobacteria;c__Actinobacteria;o__Actinomycetales;f__Micromonosporaceae;g__Couchioplanes
608	0.498238	0.00410774		0.0460591	0.309775	0.0588963	0.0999396	0.399396	0.897828	455	k__Bacteria;p__Firmicutes;c__Bacilli;o__Bacillales;f__Planococcaceae;g__Sporosarcina
609	0.499724	0.00411449		0.991149	0.610182	0.257823	0.58976	0.627399	0.194225	950	k__Bacteria;p__Verrucomicrobia;c__Verrucomicrobiae;o__Verrucomicrobiales;f__Verrucomicrobiaceae;g__
610	0.499727	0.00412125		0.791657	0.313808	0.580134	0.386452	0.38178	0.208868	927	k__Bacteria;p__TM7;c__TM7-3;o__CW040;f__F16;g__
611	0.500109	0.004128		0.0132873	0.958248	8.38213e-05	4.04758e-06	0.00110828	0.0263154	372	k__Bacteria;p__Chloroflexi;c__Chloroflexi;o__[Roseiflexales];f__[Kouleothrixaceae];g__
612	0.502966	0.00413476		0.540156	0.843954	0.534809	0.625561	0.738427	0.965871	906	k__Bacteria;p__Proteobacteria;c__Gammaproteobacteria;o__Xanthomonadales;f__Xanthomonadaceae;g__Pseudoxanthomonas
613	0.50579	0.00414152		0.646812	0.378288	0.0941621	0.119738	0.123794	0.968254	816	k__Bacteria;p__Proteobacteria;c__Deltaproteobacteria;o__PB19;f__;g__
614	0.505959	0.00414827		0.0786468	0.539438	0.000669413	0.00115652	0.00899019	0.0989255	307	k__Bacteria;p__Bacteroidetes;c__[Saprospirae];o__[Saprospirales];f__Chitinophagaceae;__
615	0.507926	0.00415503		0.473295	0.844187	0.778399	0.921043	0.857107	0.28477	42	k__Bacteria;p__Acidobacteria;c__S035;o__;f__;g__
616	0.508258	0.00416178		0.349342	0.00759678	0.214548	0.0370211	0.488009	0.732093	375	k__Bacteria;p__Chloroflexi;c__Gitt-GS-136;o__;f__;g__
617	0.510562	0.00416854		0.688797	0.579527	0.0384133	0.123109	0.0178193	0.0469681	1	Unassigned;__;__;__;__;__
618	0.512707	0.0041753		0.92007	0.114055	0.137145	0.263318	0.357166	0.7088	134	k__Bacteria;p__Actinobacteria;c__Actinobacteria;o__Actinomycetales;f__Micromonosporaceae;g__Pilimelia
619	0.513602	0.00418205		0.967338	0.824988	0.315515	0.231676	0.761265	0.103529	678	k__Bacteria;p__Proteobacteria;c__Alphaproteobacteria;o__Rhodobacterales;f__Rhodobacteraceae;g__
620	0.519856	0.00418881		0.898112	0.156636	0.955672	0.915728	0.979479	0.637899	471	k__Bacteria;p__Firmicutes;c__Bacilli;o__Lactobacillales;f__Lactobacillaceae;g__
621	0.521993	0.00419557		0.622678	0.25928	0.892154	0.957039	0.836953	0.445995	580	k__Bacteria;p__Planctomycetes;c__C6;o__MVS-107;f__;g__
622	0.52211	0.00420232		0.666942	0.0162462	0.502992	0.205364	0.451061	0.613816	14	k__Archaea;p__Euryarchaeota;c__Thermoplasmata;o__E2;f__[Methanomassiliicoccaceae];g__Methanomassiliicoccus
623	0.52211	0.00420908		0.666942	0.0162462	0.502992	0.205364	0.451061	0.613816	470	k__Bacteria;p__Firmicutes;c__Bacilli;o__Lactobacillales;f__Lactobacillaceae;__
624	0.523157	0.00421583		0.169586	0.414336	0.00713097	0.0116111	0.0498453	0.56469	655	k__Bacteria;p__Proteobacteria;c__Alphaproteobacteria;o__Rhizobiales;f__Methylocystaceae;g__Methylopila
625	0.525382	0.00422259		0.609792	0.820541	0.767218	0.944144	0.660624	0.271599	778	k__Bacteria;p__Proteobacteria;c__Deltaproteobacteria;o__Bdellovibrionales;f__Bacteriovoracaceae;g__Bacteriovorax
626	0.527216	0.00422935		0.172621	0.0138507	0.0337434	0.00534393	0.129606	0.220704	4	k__Archaea;p__Crenarchaeota;c__Thaumarchaeota;o__Cenarchaeales;f__Cenarchaeaceae;g__Nitrosopumilus
627	0.530171	0.0042361		0.556312	0.343106	0.999995	0.786005	0.63798	0.81203	504	k__Bacteria;p__Firmicutes;c__Clostridia;o__Clostridiales;f__Lachnospiraceae;g__Moryella
628	0.534336	0.00424286		0.466403	0.353253	0.00334419	0.0145494	0.0502009	0.710812	398	k__Bacteria;p__Chloroflexi;c__[Thermobacula];o__[Thermobaculales];f__[Thermobaculaceae];g__Thermobaculum
629	0.535558	0.00424961		0.385143	0.222926	0.686258	0.73295	0.591696	0.479403	670	k__Bacteria;p__Proteobacteria;c__Alphaproteobacteria;o__Rhizobiales;f__Rhizobiaceae;g__Sinorhizobium
630	0.535558	0.00425637		0.385143	0.222926	0.686258	0.73295	0.591696	0.479403	742	k__Bacteria;p__Proteobacteria;c__Betaproteobacteria;o__Burkholderiales;f__Comamonadaceae;g__Leptothrix
631	0.535558	0.00426313		0.385143	0.222926	0.686258	0.73295	0.591696	0.479403	623	k__Bacteria;p__Proteobacteria;c__Alphaproteobacteria;o__Caulobacterales;f__Caulobacteraceae;g__Asticcacaulis
632	0.536697	0.00426988		0.49082	0.474779	0.281315	0.481326	0.812464	0.565677	968	k__Bacteria;p__Verrucomicrobia;c__[Spartobacteria];o__[Chthoniobacterales];f__[Chthoniobacteraceae];g__Candidatus Xiphinematobacter
633	0.537007	0.00427664		0.0677304	0.0221728	0.594829	0.247477	0.237283	0.0919762	517	k__Bacteria;p__Firmicutes;c__Clostridia;o__Clostridiales;f__Ruminococcaceae;g__Ruminococcus
634	0.538562	0.0042834		0.586357	0.0715821	0.767227	0.514921	0.705514	0.389232	834	k__Bacteria;p__Proteobacteria;c__Gammaproteobacteria;o__Alteromonadales;f__Alteromonadaceae;g__Cellvibrio
635	0.540193	0.00429015		0.114446	0.642605	0.468521	0.404622	0.787996	0.394887	221	k__Bacteria;p__BRC1;c__PRR-11;o__;f__;g__
636	0.540891	0.00429691		0.798783	0.82	0.686795	0.479637	0.632053	0.949986	80	k__Bacteria;p__Actinobacteria;c__Actinobacteria;o__Actinomycetales;f__Actinosynnemataceae;g__Lentzea
637	0.54259	0.00430366		4.66421e-08	0.222747	0.279694	0.483501	0.18745	0.401253	763	k__Bacteria;p__Proteobacteria;c__Betaproteobacteria;o__Methylophilales;f__Methylophilaceae;g__Methylotenera
638	0.547585	0.00431042		0.291444	0.00973925	0.104382	0.0380354	0.148503	0.0702141	631	k__Bacteria;p__Proteobacteria;c__Alphaproteobacteria;o__Rhizobiales;__;__
639	0.549747	0.00431718		0.644018	0.944676	0.00122533	0.00456606	0.00741978	0.159809	941	k__Bacteria;p__Verrucomicrobia;c__Opitutae;o__HA64;f__;g__
640	0.550676	0.00432393		0.512795	0.390487	0.940027	0.738096	0.764385	0.906666	226	k__Bacteria;p__Bacteroidetes;c__Bacteroidia;o__Bacteroidales;f__;g__
641	0.552693	0.00433069		0.0720115	0.432271	0.517634	0.38555	0.869089	0.111759	965	k__Bacteria;p__Verrucomicrobia;c__[Spartobacteria];o__[Chthoniobacterales];f__01D2Z36;g__
642	0.553045	0.00433744		0.655621	0.564381	0.901202	0.949364	0.726358	0.631408	985	k__Bacteria;p__[Thermi];c__Deinococci;o__Deinococcales;f__Deinococcaceae;g__R18-435
643	0.559749	0.0043442		0.67348	0.976073	0.220169	0.20695	0.217347	0.601904	336	k__Bacteria;p__Chloroflexi;c__Anaerolineae;o__A31;f__S47;g__
644	0.563322	0.00435096		0.343718	0.366377	0.95274	0.614006	0.818522	0.0194731	867	k__Bacteria;p__Proteobacteria;c__Gammaproteobacteria;o__Legionellales;f__Coxiellaceae;g__
645	0.563828	0.00435771		0.594032	0.75805	0.0598191	0.103795	0.145112	0.00890296	126	k__Bacteria;p__Actinobacteria;c__Actinobacteria;o__Actinomycetales;f__Micromonosporaceae;__
646	0.56401	0.00436447		0.635745	0.553161	0.7947	0.564094	0.921898	0.159687	263	k__Bacteria;p__Bacteroidetes;c__Cytophagia;o__Cytophagales;f__Flammeovirgaceae;g__Fulvivirga
647	0.564886	0.00437123		0.627111	0.10976	0.838465	0.510765	0.437423	0.250054	783	k__Bacteria;p__Proteobacteria;c__Deltaproteobacteria;o__Desulfobacterales;f__Nitrospinaceae;g__Nitrospina
648	0.566478	0.00437798		0.034281	0.154207	0.101118	0.0831635	0.225524	0.0985349	204	k__Bacteria;p__Actinobacteria;c__Thermoleophilia;o__Solirubrobacterales;f__Patulibacteraceae;g__Patulibacter
649	0.567866	0.00438474		0.584035	0.0260935	0.810018	0.344334	0.96186	0.842085	273	k__Bacteria;p__Bacteroidetes;c__Flavobacteriia;o__Flavobacteriales;f__Cryomorphaceae;g__Fluviicola
650	0.569885	0.00439149		0.773349	0.149035	0.439015	0.312976	0.76836	0.202406	317	k__Bacteria;p__Chlamydiae;c__Chlamydiia;o__Chlamydiales;f__;g__
651	0.573145	0.00439825		0.378698	0.395158	0.741821	0.847054	0.570924	0.0445113	786	k__Bacteria;p__Proteobacteria;c__Deltaproteobacteria;o__Desulfuromonadales;f__Geobacteraceae;g__Geobacter
652	0.574438	0.00440501		0.349465	0.784632	0.222013	0.640286	0.486806	0.560331	808	k__Bacteria;p__Proteobacteria;c__Deltaproteobacteria;o__Myxococcales;f__OM27;g__
653	0.578932	0.00441176		0.247613	0.598678	0.420018	0.357307	0.500431	0.718253	468	k__Bacteria;p__Firmicutes;c__Bacilli;o__Lactobacillales;f__Enterococcaceae;g__Enterococcus
654	0.579443	0.00441852		0.619242	0.710569	0.152734	0.0188326	0.307567	0.60928	730	k__Bacteria;p__Proteobacteria;c__Betaproteobacteria;o__Burkholderiales;f__;g__
655	0.581347	0.00442527		0.57592	0.295809	0.453408	0.286948	0.713632	0.596746	562	k__Bacteria;p__Nitrospirae;c__Nitrospira;o__Nitrospirales;f__FW;g__4-29
656	0.582789	0.00443203		0.934562	0.550974	0.832803	0.9423	0.884676	0.479614	665	k__Bacteria;p__Proteobacteria;c__Alphaproteobacteria;o__Rhizobiales;f__Rhizobiaceae;g__
657	0.590996	0.00443879		0.144983	0.133275	0.955021	0.488409	0.505473	0.0569767	57	k__Bacteria;p__Acidobacteria;c__iii1-8;o__32-20;f__;g__
658	0.595125	0.00444554		0.88435	0.814112	0.00519457	0.0277179	0.0675063	0.602273	934	k__Bacteria;p__Tenericutes;c__Mollicutes;o__Anaeroplasmatales;f__Anaeroplasmataceae;g__Asteroleplasma
659	0.60107	0.0044523		0.348987	0.94268	0.164249	0.208468	0.331523	0.848275	953	k__Bacteria;p__Verrucomicrobia;c__Verrucomicrobiae;o__Verrucomicrobiales;f__Verrucomicrobiaceae;g__Prosthecobacter
660	0.602384	0.00445905		0.00783951	0.696499	0.014279	0.0122786	0.225922	0.796426	199	k__Bacteria;p__Actinobacteria;c__Thermoleophilia;o__Solirubrobacterales;__;__
661	0.606039	0.00446581		0.133181	0.444516	0.451523	0.106271	0.787702	0.246192	803	k__Bacteria;p__Proteobacteria;c__Deltaproteobacteria;o__Myxococcales;f__Myxococcaceae;g__Anaeromyxobacter
662	0.606634	0.00447257		0.664053	0.105509	0.957451	0.625981	0.5009	0.323502	500	k__Bacteria;p__Firmicutes;c__Clostridia;o__Clostridiales;f__Lachnospiraceae;g__Blautia
663	0.613193	0.00447932		0.558375	0.141041	1.72001e-12	4.98971e-10	1.31276e-08	0.101877	674	k__Bacteria;p__Proteobacteria;c__Alphaproteobacteria;o__Rhizobiales;f__Xanthobacteraceae;g__Labrys
664	0.614235	0.00448608		0.000705043	0.34931	0.749955	0.555542	0.71347	0.159757	608	k__Bacteria;p__Planctomycetes;c__Planctomycetia;o__Pirellulales;f__Pirellulaceae;g__
665	0.614453	0.00449284		0.0304427	0.927354	0.590659	0.826231	0.700985	0.474192	924	k__Bacteria;p__TM7;c__TM7-1;o__;f__;g__
666	0.614621	0.00449959		0.0134521	0.154847	0.0199714	0.013265	0.0416358	0.340509	738	k__Bacteria;p__Proteobacteria;c__Betaproteobacteria;o__Burkholderiales;f__Burkholderiaceae;g__
667	0.616804	0.00450635		0.397212	0.164601	0.000361277	0.00495768	0.00587222	0.395151	809	k__Bacteria;p__Proteobacteria;c__Deltaproteobacteria;o__Myxococcales;f__Polyangiaceae;__
668	0.618204	0.0045131		0.564365	0.578048	0.0557414	0.0343203	0.128859	0.159829	604	k__Bacteria;p__Planctomycetes;c__Planctomycetia;o__Gemmatales;f__Isosphaeraceae;__
669	0.620052	0.00451986		0.341795	0.504335	0.0746929	0.305746	0.0158989	0.132457	561	k__Bacteria;p__Nitrospirae;c__Nitrospira;o__Nitrospirales;f__0319-6A21;g__
670	0.62582	0.00452662		0.634694	0.202981	0.716092	0.666885	0.993104	0.292328	889	k__Bacteria;p__Proteobacteria;c__Gammaproteobacteria;o__Thiohalorhabdales;f__;g__
671	0.630082	0.00453337		0.380547	0.22714	0.718525	0.749666	0.557675	0.359608	407	k__Bacteria;p__Cyanobacteria;c__Chloroplast;o__Chlorophyta;f__Chlamydomonadaceae;__
672	0.631522	0.00454013		0.0178802	0.0113942	0.826468	0.790471	0.952366	0.64591	488	k__Bacteria;p__Firmicutes;c__Clostridia;o__Clostridiales;f__Clostridiaceae;g__Caloramator
673	0.635814	0.00454688		0.959886	0.640701	0.0221583	0.0214931	0.0150124	0.389622	111	k__Bacteria;p__Actinobacteria;c__Actinobacteria;o__Actinomycetales;f__Kineosporiaceae;g__Kineosporia
674	0.638235	0.00455364		0.603261	0.312925	0.89146	0.594189	0.902741	0.435735	69	k__Bacteria;p__Actinobacteria;c__Acidimicrobiia;o__Acidimicrobiales;f__Microthrixaceae;g__
675	0.638951	0.0045604		0.471494	0.344447	0.0103188	0.00613951	0.127741	0.0152847	875	k__Bacteria;p__Proteobacteria;c__Gammaproteobacteria;o__Methylococcales;f__;g__
676	0.639224	0.00456715		1.80222e-09	0.00756272	0.41227	0.123716	0.948854	0.0423053	438	k__Bacteria;p__Firmicutes;c__Bacilli;o__Bacillales;f__Bacillaceae;g__Bacillus
677	0.649361	0.00457391		0.145156	0.871654	0.342093	0.401404	0.538173	0.536056	949	k__Bacteria;p__Verrucomicrobia;c__Verrucomicrobiae;o__Verrucomicrobiales;f__Verrucomicrobiaceae;__
678	0.64942	0.00458067		0.101429	0.56021	0.851657	0.711748	0.595493	0.600157	538	k__Bacteria;p__GN02;c__GKS2-174;o__;f__;g__
679	0.651948	0.00458742		0.358187	0.0353231	0.796908	0.492475	0.254288	0.641499	583	k__Bacteria;p__Planctomycetes;c__OM190;o__CL500-15;f__;g__
680	0.657081	0.00459418		0.160577	0.0370594	0.243374	0.101936	0.479631	0.737308	503	k__Bacteria;p__Firmicutes;c__Clostridia;o__Clostridiales;f__Lachnospiraceae;g__Epulopiscium
681	0.659217	0.00460093		0.412935	0.0966407	0.689547	0.428731	0.230752	0.507737	748	k__Bacteria;p__Proteobacteria;c__Betaproteobacteria;o__Burkholderiales;f__Comamonadaceae;g__Variovorax
682	0.660222	0.00460769		0.620869	0.774932	0.158692	0.227935	0.00885337	0.811597	709	k__Bacteria;p__Proteobacteria;c__Alphaproteobacteria;o__Rickettsiales;f__mitochondria;g__Dictyostelium
683	0.662139	0.00461445		0.0679384	0.993109	0.651326	0.174799	0.795392	0.0560204	819	k__Bacteria;p__Proteobacteria;c__Deltaproteobacteria;o__Syntrophobacterales;f__Syntrophobacteraceae;g__Syntrophobacter
684	0.663426	0.0046212		0.844802	0.664632	0.588746	0.492572	0.530183	0.982321	139	k__Bacteria;p__Actinobacteria;c__Actinobacteria;o__Actinomycetales;f__Nocardiaceae;__
685	0.668539	0.00462796		0.0635023	0.209436	0.322081	0.116138	0.456432	0.743441	481	k__Bacteria;p__Firmicutes;c__Clostridia;o__;f__;g__
686	0.669578	0.00463471		0.158517	0.520948	0.618141	0.356426	0.75907	0.0347098	184	k__Bacteria;p__Actinobacteria;c__Coriobacteriia;o__Coriobacteriales;f__Coriobacteriaceae;__
687	0.669965	0.00464147		0.244364	0.705658	0.923033	0.65683	0.688771	0.337224	214	k__Bacteria;p__Armatimonadetes;c__SJA-176;o__GAB-B06;f__;g__
688	0.670096	0.00464823		0.10439	0.944344	0.130605	0.091716	0.4403	0.566811	441	k__Bacteria;p__Firmicutes;c__Bacilli;o__Bacillales;f__Bacillaceae;g__Virgibacillus
689	0.671133	0.00465498		0.581921	0.837568	0.161832	0.242849	0.0103812	0.889796	225	k__Bacteria;p__Bacteroidetes;c__Bacteroidia;o__Bacteroidales;__;__
690	0.674339	0.00466174		8.15048e-06	0.452427	0.966332	0.728802	0.922004	0.993262	261	k__Bacteria;p__Bacteroidetes;c__Cytophagia;o__Cytophagales;f__Flammeovirgaceae;__
691	0.677549	0.0046685		0.112846	0.654315	0.295567	0.684424	0.280199	0.89318	792	k__Bacteria;p__Proteobacteria;c__Deltaproteobacteria;o__Myxococcales;__;__
692	0.680109	0.00467525		0.334111	0.919391	0.920835	0.72903	0.694686	0.37999	195	k__Bacteria;p__Actinobacteria;c__Thermoleophilia;o__;f__;g__
693	0.680842	0.00468201		0.626504	0.299353	0.730285	0.67389	0.984922	0.300731	956	k__Bacteria;p__Verrucomicrobia;c__[Pedosphaerae];o__;f__;g__
694	0.680842	0.00468876		0.626504	0.299353	0.730285	0.67389	0.984922	0.300731	945	k__Bacteria;p__Verrucomicrobia;c__Opitutae;o__Puniceicoccales;f__Puniceicoccaceae;g__Coraliomargarita
695	0.680842	0.00469552		0.626504	0.299353	0.730285	0.67389	0.984922	0.300731	89	k__Bacteria;p__Actinobacteria;c__Actinobacteria;o__Actinomycetales;f__Cryptosporangiaceae;g__
696	0.680842	0.00470228		0.626504	0.299353	0.730285	0.67389	0.984922	0.300731	264	k__Bacteria;p__Bacteroidetes;c__Cytophagia;o__Cytophagales;f__[Amoebophilaceae];g__
697	0.680842	0.00470903		0.626504	0.299353	0.730285	0.67389	0.984922	0.300731	20	k__Bacteria;p__Acidobacteria;c__AT-s2-57;o__;f__;g__
698	0.680842	0.00471579		0.626504	0.299353	0.730285	0.67389	0.984922	0.300731	587	k__Bacteria;p__Planctomycetes;c__Phycisphaerae;o__CCM11a;f__;g__
699	0.686128	0.00472254		0.0305813	0.515995	0.523222	0.850103	0.970117	0.314936	560	k__Bacteria;p__NKB19;c__TSBW08;o__;f__;g__
700	0.688953	0.0047293		0.482559	0.962947	0.132025	0.110412	0.608472	0.552581	322	k__Bacteria;p__Chlamydiae;c__Chlamydiia;o__Chlamydiales;f__Simkaniaceae;__
701	0.692963	0.00473606		0.78059	0.460288	0.979176	0.920364	0.765036	0.648827	210	k__Bacteria;p__Armatimonadetes;c__Chthonomonadetes;o__Chthonomonadales;f__Chthonomonadaceae;g__
702	0.693031	0.00474281		0.114074	0.602383	0.276053	0.135559	0.212293	0.467392	482	k__Bacteria;p__Firmicutes;c__Clostridia;o__Clostridiales;__;__
703	0.693385	0.00474957		0.0080822	0.929137	0.288544	0.146093	0.142803	0.116789	339	k__Bacteria;p__Chloroflexi;c__Anaerolineae;o__Ardenscatenales;f__Ardenscatenaceae;g__Ardenscatena
704	0.69797	0.00475633		0.366114	0.110812	0.627838	0.682091	0.766387	0.0477288	522	k__Bacteria;p__Firmicutes;c__Clostridia;o__Clostridiales;f__Veillonellaceae;g__Pelosinus
705	0.699257	0.00476308		0.114754	0.88231	0.338485	0.519386	0.846	0.206256	268	k__Bacteria;p__Bacteroidetes;c__Flavobacteriia;o__Flavobacteriales;f__Cryomorphaceae;__
706	0.701464	0.00476984		0.718881	0.902035	0.0410784	0.11284	0.00887906	0.0376377	869	k__Bacteria;p__Proteobacteria;c__Gammaproteobacteria;o__Legionellales;f__Coxiellaceae;g__Rickettsiella
707	0.704158	0.00477659		0.451967	0.602834	0.144256	0.0409647	0.0665498	0.263337	385	k__Bacteria;p__Chloroflexi;c__TK10;o__AKYG885;f__5B-12;g__
708	0.705236	0.00478335		0.308382	0.0127639	0.553742	0.528937	0.702923	0.833194	153	k__Bacteria;p__Actinobacteria;c__Actinobacteria;o__Actinomycetales;f__Promicromonosporaceae;__
709	0.707582	0.00479011		0.931313	0.215987	0.441668	0.55837	0.553875	0.866224	506	k__Bacteria;p__Firmicutes;c__Clostridia;o__Clostridiales;f__Lachnospiraceae;g__Roseburia
710	0.70954	0.00479686		0.518516	0.790701	0.968879	0.724019	0.632301	0.0578363	110	k__Bacteria;p__Actinobacteria;c__Actinobacteria;o__Actinomycetales;f__Kineosporiaceae;g__Kineococcus
711	0.710418	0.00480362		0.498592	0.741917	0.00883834	0.000684426	0.171059	0.225774	591	k__Bacteria;p__Planctomycetes;c__Phycisphaerae;o__Phycisphaerales;f__Phycisphaeraceae;g__
712	0.712406	0.00481037		0.683601	0.906499	0.0793753	0.195318	0.0241495	0.02411	409	k__Bacteria;p__Cyanobacteria;c__Chloroplast;o__Chlorophyta;f__Chlamydomonadaceae;g__Dunaliella
713	0.712406	0.00481713		0.683601	0.906499	0.0793753	0.195318	0.0241495	0.02411	84	k__Bacteria;p__Actinobacteria;c__Actinobacteria;o__Actinomycetales;f__Cellulomonadaceae;__
714	0.714748	0.00482389		0.048171	0.125475	0.925948	0.366712	0.690369	0.0339713	211	k__Bacteria;p__Armatimonadetes;c__Chthonomonadetes;o__SJA-22;f__;g__
715	0.715101	0.00483064		0.137877	0.399811	0.868655	0.509565	0.886667	0.304869	290	k__Bacteria;p__Bacteroidetes;c__Flavobacteriia;o__Flavobacteriales;f__[Weeksellaceae];g__
716	0.715148	0.0048374		0.991291	0.701729	0.961482	0.984474	0.718604	0.189327	303	k__Bacteria;p__Bacteroidetes;c__[Rhodothermi];o__[Rhodothermales];f__[Balneolaceae];g__Balneola
717	0.716486	0.00484416		0.978945	0.98438	0.000322791	0.001897	0.0074845	0.829864	47	k__Bacteria;p__Acidobacteria;c__Solibacteres;o__Solibacterales;f__PK34;g__
718	0.721166	0.00485091		0.425584	0.457497	0.836888	0.76047	0.704627	0.109524	119	k__Bacteria;p__Actinobacteria;c__Actinobacteria;o__Actinomycetales;f__Microbacteriaceae;g__Salinibacterium
719	0.72296	0.00485767		0.529468	0.599983	0.492358	0.368861	0.63247	0.29744	865	k__Bacteria;p__Proteobacteria;c__Gammaproteobacteria;o__Legionellales;f__;g__
720	0.723658	0.00486442		0.898142	0.538841	0.786817	0.836048	0.704711	0.547681	666	k__Bacteria;p__Proteobacteria;c__Alphaproteobacteria;o__Rhizobiales;f__Rhizobiaceae;g__Agrobacterium
721	0.724096	0.00487118		0.853775	0.82906	0.0561003	0.0581701	0.0820836	0.278103	174	k__Bacteria;p__Actinobacteria;c__Actinobacteria;o__Actinomycetales;f__Streptosporangiaceae;g__Streptosporangium
722	0.731346	0.00487794		0.440207	0.249439	0.00022793	0.00305522	0.00465458	0.290962	702	k__Bacteria;p__Proteobacteria;c__Alphaproteobacteria;o__Rickettsiales;f__Holosporaceae;g__
723	0.731346	0.00488469		0.440207	0.249439	0.00022793	0.00305522	0.00465458	0.290962	805	k__Bacteria;p__Proteobacteria;c__Deltaproteobacteria;o__Myxococcales;f__Nannocystaceae;__
724	0.731346	0.00489145		0.440207	0.249439	0.00022793	0.00305522	0.00465458	0.290962	359	k__Bacteria;p__Chloroflexi;c__Chloroflexi;__;__;__
725	0.731346	0.0048982		0.440207	0.249439	0.00022793	0.00305522	0.00465458	0.290962	422	k__Bacteria;p__Cyanobacteria;c__Synechococcophycideae;o__Pseudanabaenales;f__Pseudanabaenaceae;g__
726	0.734914	0.00490496		0.826031	0.126127	0.847919	0.875478	0.717998	0.868502	68	k__Bacteria;p__Actinobacteria;c__Acidimicrobiia;o__Acidimicrobiales;f__JdFBGBact;g__
727	0.738863	0.00491172		0.740737	0.512723	0.141161	0.15334	0.236609	0.730233	401	k__Bacteria;p__Cyanobacteria;c__4C0d-2;o__SM1D11;f__;g__
728	0.740293	0.00491847		0.741004	0.0104378	0.732477	0.0907508	0.403622	4.02846e-05	215	k__Bacteria;p__Armatimonadetes;c__SJA-176;o__RB046;f__;g__
729	0.746629	0.00492523		0.0517493	0.140893	0.896212	0.888406	0.488049	0.00652165	75	k__Bacteria;p__Actinobacteria;c__Actinobacteria;o__Actinomycetales;f__;g__
730	0.747302	0.00493199		0.504674	0.243639	0.264893	0.172843	0.51723	0.407705	321	k__Bacteria;p__Chlamydiae;c__Chlamydiia;o__Chlamydiales;f__Rhabdochlamydiaceae;g__Candidatus Rhabdochlamydia
731	0.748497	0.00493874		0.76715	0.602681	0.901672	0.980098	0.785088	0.189426	868	k__Bacteria;p__Proteobacteria;c__Gammaproteobacteria;o__Legionellales;f__Coxiellaceae;g__Aquicella
732	0.751213	0.0049455		0.545186	0.922013	0.75758	0.795728	0.98924	0.472348	202	k__Bacteria;p__Actinobacteria;c__Thermoleophilia;o__Solirubrobacterales;f__Conexibacteraceae;g__Conexibacter
733	0.751317	0.00495225		0.506503	0.278753	5.28907e-05	5.99138e-05	0.000284548	0.410352	129	k__Bacteria;p__Actinobacteria;c__Actinobacteria;o__Actinomycetales;f__Micromonosporaceae;g__Actinoplanes
734	0.751608	0.00495901		0.850899	0.477701	0.915493	0.551295	0.577648	0.868782	219	k__Bacteria;p__BHI80-139;c__;o__;f__;g__
735	0.754532	0.00496577		0.724584	0.626975	0.874979	0.849672	0.716464	0.704779	555	k__Bacteria;p__Kazan-3B-28;c__;o__;f__;g__
736	0.756456	0.00497252		1.54118e-05	0.914713	0.967283	0.813494	0.95043	0.620792	140	k__Bacteria;p__Actinobacteria;c__Actinobacteria;o__Actinomycetales;f__Nocardiaceae;g__
737	0.756773	0.00497928		0.57807	0.840618	0.486334	0.64117	0.9085	0.356315	436	k__Bacteria;p__Firmicutes;c__Bacilli;o__Bacillales;f__Bacillaceae;__
738	0.75707	0.00498603		0.425611	0.206924	0.572315	0.805124	0.811034	0.470058	11	k__Archaea;p__Euryarchaeota;c__Thermoplasmata;o__E2;__;__
739	0.758581	0.00499279		0.625381	0.417523	0.821798	0.55482	0.810197	0.37721	490	k__Bacteria;p__Firmicutes;c__Clostridia;o__Clostridiales;f__Clostridiaceae;g__Geosporobacter_Thermotalea
740	0.760692	0.00499955		0.56184	0.544467	0.0928335	0.0737834	0.411242	0.0378439	266	k__Bacteria;p__Bacteroidetes;c__Flavobacteriia;o__Flavobacteriales;__;__
741	0.765112	0.0050063		0.394824	0.0477398	0.380354	0.727732	0.738883	0.143004	181	k__Bacteria;p__Actinobacteria;c__Actinobacteria;o__Actinomycetales;f__Yaniellaceae;g__Yaniella
742	0.765238	0.00501306		0.132612	0.13801	0.218411	0.100285	0.214645	0.637163	240	k__Bacteria;p__Bacteroidetes;c__Bacteroidia;o__Bacteroidales;f__[Paraprevotellaceae];__
743	0.766086	0.00501981		0.407134	0.786926	0.978859	0.748961	0.446752	0.549717	712	k__Bacteria;p__Proteobacteria;c__Alphaproteobacteria;o__Rickettsiales;f__mitochondria;g__Pythium
744	0.767363	0.00502657		0.367701	0.537465	0.00178467	0.000877698	0.0214866	0.358854	554	k__Bacteria;p__Gemmatimonadetes;c__Gemmatimonadetes;o__N1423WL;f__;g__
745	0.771404	0.00503333		0.582682	0.724704	0.983837	0.705627	0.688311	0.957783	571	k__Bacteria;p__OP11;c__OP11-3;o__;f__;g__
746	0.772665	0.00504008		4.16988e-14	0.323319	0.874004	0.549146	0.951802	0.894964	177	k__Bacteria;p__Actinobacteria;c__Actinobacteria;o__Actinomycetales;f__Thermomonosporaceae;g__Actinoallomurus
747	0.774611	0.00504684		0.141062	0.538463	0.548166	0.260143	0.678075	0.417593	749	k__Bacteria;p__Proteobacteria;c__Betaproteobacteria;o__Burkholderiales;f__Oxalobacteraceae;__
748	0.775249	0.0050536		0.514059	0.275323	0.787155	0.977903	0.868214	0.127766	768	k__Bacteria;p__Proteobacteria;c__Betaproteobacteria;o__Procabacteriales;f__Procabacteriaceae;g__
749	0.779508	0.00506035		0.439202	0.963213	0.105138	0.105908	0.0548148	0.45638	425	k__Bacteria;p__Elusimicrobia;c__Elusimicrobia;o__FAC88;f__;g__
750	0.780465	0.00506711		0.0184713	0.509318	0.207915	0.943342	0.12457	0.00383577	188	k__Bacteria;p__Actinobacteria;c__MB-A2-108;o__;f__;g__
751	0.784702	0.00507386		0.141029	0.644819	0.962645	0.522643	0.927099	0.680654	780	k__Bacteria;p__Proteobacteria;c__Deltaproteobacteria;o__Bdellovibrionales;f__Bdellovibrionaceae;g__Bdellovibrio
752	0.786318	0.00508062		0.689316	0.477989	0.345018	0.290119	0.161797	0.205132	196	k__Bacteria;p__Actinobacteria;c__Thermoleophilia;o__Gaiellales;f__;g__
753	0.78855	0.00508738		0.567228	0.295034	0.54751	0.886597	0.943613	0.863903	885	k__Bacteria;p__Proteobacteria;c__Gammaproteobacteria;o__Pseudomonadales;f__Pseudomonadaceae;__
754	0.789952	0.00509413		0.446852	0.414181	0.0719052	0.120558	0.344225	0.295856	366	k__Bacteria;p__Chloroflexi;c__Chloroflexi;o__Chloroflexales;f__FFCH7168;g__
755	0.789992	0.00510089		0.984885	0.128074	0.683264	0.568877	0.365004	0.109303	352	k__Bacteria;p__Chloroflexi;c__Anaerolineae;o__SBR1031;f__SJA-101;g__
756	0.793274	0.00510764		0.597209	0.620598	0.658775	0.987341	0.636927	0.824024	974	k__Bacteria;p__WPS-2;c__;o__;f__;g__
757	0.795051	0.0051144		0.813697	0.932191	0.245208	0.24517	0.301481	0.660973	512	k__Bacteria;p__Firmicutes;c__Clostridia;o__Clostridiales;f__Peptostreptococcaceae;g__Tepidibacter
758	0.796408	0.00512116		0.323259	0.195786	0.550473	0.62855	0.914268	0.325794	573	k__Bacteria;p__OP3;c__PBS-25;o__;f__;g__
759	0.798952	0.00512791		0.0168739	0.5764	0.112748	0.034034	0.00628048	0.558983	365	k__Bacteria;p__Chloroflexi;c__Chloroflexi;o__Chloroflexales;f__Chloroflexaceae;g__Chloronema
760	0.799119	0.00513467		0.633219	0.885167	0.0988714	0.141686	0.00578929	0.813797	774	k__Bacteria;p__Proteobacteria;c__Betaproteobacteria;o__Tremblayales;f__Tremblayaceae;g__Tremblaya
761	0.801516	0.00514143		0.624854	0.758841	8.91363e-06	2.48201e-05	0.00321375	0.733525	218	k__Bacteria;p__Armatimonadetes;c__[Fimbriimonadia];o__[Fimbriimonadales];f__[Fimbriimonadaceae];g__Fimbriimonas
762	0.803618	0.00514818		0.897532	0.834576	0.386267	0.166805	0.593709	0.47991	732	k__Bacteria;p__Proteobacteria;c__Betaproteobacteria;o__Burkholderiales;f__Alcaligenaceae;g__
763	0.805337	0.00515494		0.780204	0.818398	0.643344	0.58783	0.623547	0.816518	592	k__Bacteria;p__Planctomycetes;c__Phycisphaerae;o__Pla1;f__;g__
764	0.805337	0.00516169		0.780204	0.818398	0.643344	0.58783	0.623547	0.816518	770	k__Bacteria;p__Proteobacteria;c__Betaproteobacteria;o__Rhodocyclales;f__Rhodocyclaceae;g__Dechloromonas
765	0.810849	0.00516845		2.52882e-12	0.400096	0.896189	0.559612	0.973997	0.869147	48	k__Bacteria;p__Acidobacteria;c__Solibacteres;o__Solibacterales;f__Solibacteraceae;g__
766	0.812198	0.00517521		0.130757	0.291672	0.0844671	0.10003	0.380311	0.0702137	128	k__Bacteria;p__Actinobacteria;c__Actinobacteria;o__Actinomycetales;f__Micromonosporaceae;g__Actinocatenispora
767	0.81358	0.00518196		0.554951	0.128829	0.570719	0.603656	0.903528	0.101365	271	k__Bacteria;p__Bacteroidetes;c__Flavobacteriia;o__Flavobacteriales;f__Cryomorphaceae;g__Crocinitomix
768	0.814382	0.00518872		0.543705	0.68879	0.73994	0.489298	0.520869	0.892222	747	k__Bacteria;p__Proteobacteria;c__Betaproteobacteria;o__Burkholderiales;f__Comamonadaceae;g__Rubrivivax
769	0.815738	0.00519547		3.81048e-13	0.397927	0.93481	0.612813	0.976706	0.898752	312	k__Bacteria;p__Bacteroidetes;c__[Saprospirae];o__[Saprospirales];f__Chitinophagaceae;g__Sediminibacterium
770	0.818387	0.00520223		0.399425	0.77956	0.29146	0.747421	0.442682	0.25627	77	k__Bacteria;p__Actinobacteria;c__Actinobacteria;o__Actinomycetales;f__Actinosynnemataceae;__
771	0.819069	0.00520899		1.07959e-15	0.945278	0.397533	0.739138	0.651148	0.306094	30	k__Bacteria;p__Acidobacteria;c__Acidobacteriia;o__Acidobacteriales;f__Acidobacteriaceae;g__
772	0.820192	0.00521574		0.48587	0.881202	0.381794	0.712743	0.449695	0.650836	300	k__Bacteria;p__Bacteroidetes;c__VC2_1_Bac22;o__;f__;g__
773	0.824607	0.0052225		0.0573656	0.0311967	0.62681	0.708138	0.647923	0.00191122	346	k__Bacteria;p__Chloroflexi;c__Anaerolineae;o__GCA004;f__;g__
774	0.826392	0.00522926		0.157225	0.800985	0.566345	0.368544	0.318466	0.935845	975	k__Bacteria;p__WS2;c__SHA-109;o__;f__;g__
775	0.829633	0.00523601		0.81285	0.81119	0.0490786	0.180847	0.171918	0.256508	921	k__Bacteria;p__TM7;c__;o__;f__;g__
776	0.829728	0.00524277		0.471437	0.291374	0.231517	0.158481	0.0746255	0.961589	185	k__Bacteria;p__Actinobacteria;c__Coriobacteriia;o__Coriobacteriales;f__Coriobacteriaceae;g__
777	0.830653	0.00524952		0.695067	0.308382	0.383769	0.414171	0.964336	0.0673985	277	k__Bacteria;p__Bacteroidetes;c__Flavobacteriia;o__Flavobacteriales;f__Flavobacteriaceae;g__Aequorivita
778	0.831858	0.00525628		0.328323	0.253369	0.935441	0.759907	0.842542	0.733206	751	k__Bacteria;p__Proteobacteria;c__Betaproteobacteria;o__Burkholderiales;f__Oxalobacteraceae;g__Cupriavidus
779	0.833662	0.00526304		0.022887	0.908957	0.2213	0.117647	0.4629	0.99207	527	k__Bacteria;p__Firmicutes;c__Clostridia;o__Clostridiales;f__[Tissierellaceae];g__
780	0.836491	0.00526979		0.228793	0.838441	0.730939	0.485924	0.797285	0.422758	341	k__Bacteria;p__Chloroflexi;c__Anaerolineae;o__Caldilineales;__;__
781	0.841069	0.00527655		0.861075	0.94293	0.649065	0.617977	0.971666	0.749243	451	k__Bacteria;p__Firmicutes;c__Bacilli;o__Bacillales;f__Planococcaceae;g__Planococcus
782	0.84118	0.0052833		0.891716	0.815504	0.956905	0.956779	0.633386	0.375035	588	k__Bacteria;p__Planctomycetes;c__Phycisphaerae;o__CPla-3;f__;g__
783	0.841665	0.00529006		0.00068489	0.290591	0.792904	0.680039	0.597631	0.296029	539	k__Bacteria;p__GOUTA4;c__;o__;f__;g__
784	0.841665	0.00529682		0.00068489	0.290591	0.792904	0.680039	0.597631	0.296029	439	k__Bacteria;p__Firmicutes;c__Bacilli;o__Bacillales;f__Bacillaceae;g__Geobacillus
785	0.84198	0.00530357		0.32712	0.917711	0.537597	0.559208	0.6014	0.456073	585	k__Bacteria;p__Planctomycetes;c__Phycisphaerae;__;__;__
786	0.843105	0.00531033		0.317623	0.0112422	0.44495	0.199027	0.468909	0.628896	486	k__Bacteria;p__Firmicutes;c__Clostridia;o__Clostridiales;f__Clostridiaceae;g__
787	0.843694	0.00531709		0.809899	0.822117	0.914585	0.9798	0.976781	0.141592	576	k__Bacteria;p__Planctomycetes;__;__;__;__
788	0.843776	0.00532384		0.0548657	0.641533	0.347753	0.503806	0.143524	0.187635	926	k__Bacteria;p__TM7;c__TM7-3;o__;f__;g__
789	0.843997	0.0053306		0.279581	0.151562	0.170962	0.0681095	0.0826524	0.263756	186	k__Bacteria;p__Actinobacteria;c__Coriobacteriia;o__Coriobacteriales;f__Coriobacteriaceae;g__Adlercreutzia
790	0.845084	0.00533735		0.121658	0.55506	0.493929	0.676984	0.89405	0.23581	790	k__Bacteria;p__Proteobacteria;c__Deltaproteobacteria;o__GMD14H09;f__;g__
791	0.845799	0.00534411		0.890346	0.294573	0.207776	0.152416	0.144927	0.709784	245	k__Bacteria;p__Bacteroidetes;c__Cytophagia;o__Cytophagales;__;__
792	0.848333	0.00535087		0.669986	0.343967	0.118625	0.0482904	0.248584	0.210591	852	k__Bacteria;p__Proteobacteria;c__Gammaproteobacteria;o__Chromatiales;f__Ectothiorhodospiraceae;g__Halorhodospira
793	0.84942	0.00535762		0.688552	0.858316	0.571717	0.556972	0.953679	0.104439	285	k__Bacteria;p__Bacteroidetes;c__Flavobacteriia;o__Flavobacteriales;f__Flavobacteriaceae;g__Psychroflexus
794	0.849474	0.00536438		0.807168	0.266545	0.367427	0.508615	0.489327	0.443128	657	k__Bacteria;p__Proteobacteria;c__Alphaproteobacteria;o__Rhizobiales;f__Methylocystaceae;g__Pleomorphomonas
795	0.849698	0.00537113		0.466409	0.676563	0.0103191	0.0192535	0.0319596	0.812332	450	k__Bacteria;p__Firmicutes;c__Bacilli;o__Bacillales;f__Planococcaceae;g__Paenisporosarcina
796	0.850014	0.00537789		0.636506	0.753624	0.923215	0.796599	0.461344	0.967165	625	k__Bacteria;p__Proteobacteria;c__Alphaproteobacteria;o__Caulobacterales;f__Caulobacteraceae;g__Caulobacter
797	0.850372	0.00538465		0.00942897	0.0991796	0.398345	0.250036	0.253824	0.972838	138	k__Bacteria;p__Actinobacteria;c__Actinobacteria;o__Actinomycetales;f__Nakamurellaceae;g__
798	0.853609	0.0053914		0.00666598	0.250348	0.200115	0.298058	0.615594	0.131282	93	k__Bacteria;p__Actinobacteria;c__Actinobacteria;o__Actinomycetales;f__Dermacoccaceae;g__Dermacoccus
799	0.86101	0.00539816		0.831654	0.351131	0.417263	0.0843024	0.492135	0.479133	694	k__Bacteria;p__Proteobacteria;c__Alphaproteobacteria;o__Rhodospirillales;f__Rhodospirillaceae;g__Inquilinus
800	0.861527	0.00540492		6.06213e-05	0.847364	0.64146	0.608354	0.752317	0.294561	203	k__Bacteria;p__Actinobacteria;c__Thermoleophilia;o__Solirubrobacterales;f__Patulibacteraceae;g__
801	0.861949	0.00541167		0.935734	0.128118	0.410303	0.575725	0.990383	0.934563	231	k__Bacteria;p__Bacteroidetes;c__Bacteroidia;o__Bacteroidales;f__Porphyromonadaceae;g__Paludibacter
802	0.862902	0.00541843		0.137559	0.221423	0.395096	0.893995	0.964057	0.015663	383	k__Bacteria;p__Chloroflexi;c__TK10;__;__;__
803	0.863107	0.00542518		0.0414487	0.136005	0.00677846	0.000203931	0.0322818	0.856967	282	k__Bacteria;p__Bacteroidetes;c__Flavobacteriia;o__Flavobacteriales;f__Flavobacteriaceae;g__Muricauda
804	0.865326	0.00543194		0.677261	0.96257	0.404181	0.416984	0.823347	0.738187	880	k__Bacteria;p__Proteobacteria;c__Gammaproteobacteria;o__Oceanospirillales;f__Halomonadaceae;g__Haererehalobacter
805	0.870389	0.0054387		0.862991	0.373117	0.955649	0.590233	0.779572	0.788355	706	k__Bacteria;p__Proteobacteria;c__Alphaproteobacteria;o__Rickettsiales;f__mitochondria;__
806	0.874697	0.00544545		0.395469	0.742977	0.565772	0.86142	0.863225	0.352565	464	k__Bacteria;p__Firmicutes;c__Bacilli;o__Lactobacillales;f__Aerococcaceae;g__
807	0.875877	0.00545221		0.108932	0.233604	0.539369	0.451939	0.629001	0.244013	146	k__Bacteria;p__Actinobacteria;c__Actinobacteria;o__Actinomycetales;f__Nocardioidaceae;g__Aeromicrobium
808	0.877523	0.00545896		0.505368	0.624931	0.872427	0.430288	0.514729	0.960788	638	k__Bacteria;p__Proteobacteria;c__Alphaproteobacteria;o__Rhizobiales;f__Bradyrhizobiaceae;g__Bosea
809	0.878398	0.00546572		0.512615	0.364382	0.475841	0.536644	0.393573	0.364998	598	k__Bacteria;p__Planctomycetes;c__Planctomycetia;__;__;__
810	0.879793	0.00547248		0.584359	0.972753	0.707655	0.314947	0.367257	0.980535	789	k__Bacteria;p__Proteobacteria;c__Deltaproteobacteria;o__FAC87;f__;g__
811	0.885715	0.00547923		0.112991	0.41757	0.468529	0.181886	0.198698	0.115124	65	k__Bacteria;p__Actinobacteria;c__Acidimicrobiia;o__Acidimicrobiales;f__EB1017;g__
812	0.888107	0.00548599		0.549967	0.423766	0.913377	0.900074	0.428353	0.156697	553	k__Bacteria;p__Gemmatimonadetes;c__Gemmatimonadetes;o__KD8-87;f__;g__
813	0.888407	0.00549274		0.982347	0.697668	0.772207	0.694761	0.633196	0.791543	802	k__Bacteria;p__Proteobacteria;c__Deltaproteobacteria;o__Myxococcales;f__Myxococcaceae;g__
814	0.88905	0.0054995		0.552192	0.652962	0.491652	0.411401	0.578299	0.525649	886	k__Bacteria;p__Proteobacteria;c__Gammaproteobacteria;o__Pseudomonadales;f__Pseudomonadaceae;g__
815	0.889721	0.00550626		0.152808	0.633714	0.624673	0.354642	0.53331	0.952839	548	k__Bacteria;p__Gemmatimonadetes;c__Gemmatimonadetes;o__C114;f__;g__
816	0.894078	0.00551301		0.805411	0.10835	0.772522	0.990898	0.873406	0.849922	671	k__Bacteria;p__Proteobacteria;c__Alphaproteobacteria;o__Rhizobiales;f__Rhodobiaceae;__
817	0.895269	0.00551977		0.00994802	0.289217	0.224504	0.313804	0.612867	0.158428	901	k__Bacteria;p__Proteobacteria;c__Gammaproteobacteria;o__Xanthomonadales;f__Xanthomonadaceae;g__Dyella
818	0.895544	0.00552653		0.00999231	0.289504	0.22478	0.314092	0.613079	0.158676	895	k__Bacteria;p__Proteobacteria;c__Gammaproteobacteria;o__Xanthomonadales;f__Sinobacteraceae;g__Nevskia
819	0.901029	0.00553328		0.630926	0.899852	0.80577	0.916399	0.765618	0.933968	319	k__Bacteria;p__Chlamydiae;c__Chlamydiia;o__Chlamydiales;f__Parachlamydiaceae;g__
820	0.902462	0.00554004		0.0038133	0.196778	0.436237	0.556365	0.992039	0.937775	719	k__Bacteria;p__Proteobacteria;c__Alphaproteobacteria;o__Sphingomonadales;f__Sphingomonadaceae;__
821	0.903005	0.00554679		0.104017	0.285565	0.906005	0.648601	0.584021	0.218353	828	k__Bacteria;p__Proteobacteria;c__Gammaproteobacteria;o__Alteromonadales;__;__
822	0.905823	0.00555355		0.00211008	0.3695	0.249584	0.362286	0.645823	0.188219	907	k__Bacteria;p__Proteobacteria;c__Gammaproteobacteria;o__Xanthomonadales;f__Xanthomonadaceae;g__Rhodanobacter
823	0.910177	0.00556031		0.721984	0.874086	0.615656	0.602098	0.958876	0.149482	842	k__Bacteria;p__Proteobacteria;c__Gammaproteobacteria;o__Alteromonadales;f__J115;g__
824	0.910706	0.00556706		0.614344	0.508234	0.0726653	0.0551638	0.286502	0.089625	515	k__Bacteria;p__Firmicutes;c__Clostridia;o__Clostridiales;f__Ruminococcaceae;g__Faecalibacterium
825	0.910706	0.00557382		0.614344	0.508234	0.0726653	0.0551638	0.286502	0.089625	323	k__Bacteria;p__Chlamydiae;c__Chlamydiia;o__Chlamydiales;f__Simkaniaceae;g__
826	0.910706	0.00558057		0.614344	0.508234	0.0726653	0.0551638	0.286502	0.089625	334	k__Bacteria;p__Chloroflexi;c__Anaerolineae;__;__;__
827	0.910706	0.00558733		0.614344	0.508234	0.0726653	0.0551638	0.286502	0.089625	932	k__Bacteria;p__Tenericutes;c__Mollicutes;o__Anaeroplasmatales;f__Anaeroplasmataceae;g__
828	0.910706	0.00559409		0.614344	0.508234	0.0726653	0.0551638	0.286502	0.089625	754	k__Bacteria;p__Proteobacteria;c__Betaproteobacteria;o__Burkholderiales;f__Oxalobacteraceae;g__Oxalobacter
829	0.910706	0.00560084		0.614344	0.508234	0.0726653	0.0551638	0.286502	0.089625	874	k__Bacteria;p__Proteobacteria;c__Gammaproteobacteria;o__Methylococcales;__;__
830	0.910706	0.0056076		0.614344	0.508234	0.0726653	0.0551638	0.286502	0.089625	15	k__Archaea;p__[Parvarchaeota];c__[Parvarchaea];o__WCHD3-30;f__;g__
831	0.910706	0.00561436		0.614344	0.508234	0.0726653	0.0551638	0.286502	0.089625	833	k__Bacteria;p__Proteobacteria;c__Gammaproteobacteria;o__Alteromonadales;f__Alteromonadaceae;g__BD2-13
832	0.914243	0.00562111		0.34062	0.715075	0.3598	0.266976	0.493076	0.622175	530	k__Bacteria;p__Firmicutes;c__Clostridia;o__Clostridiales;f__[Tissierellaceae];g__Tepidimicrobium
833	0.914298	0.00562787		0.0753295	0.306665	0.430805	0.229599	0.684972	0.913585	472	k__Bacteria;p__Firmicutes;c__Bacilli;o__Lactobacillales;f__Lactobacillaceae;g__Lactobacillus
834	0.914636	0.00563462		0.264444	0.167663	0.653459	0.481418	0.664765	0.39993	761	k__Bacteria;p__Proteobacteria;c__Betaproteobacteria;o__Methylophilales;f__Methylophilaceae;__
835	0.916466	0.00564138		0.319102	0.783367	0.726442	0.738718	0.871924	0.201232	191	k__Bacteria;p__Actinobacteria;c__Nitriliruptoria;o__Nitriliruptorales;f__Nitriliruptoraceae;g__Nitriliruptor
836	0.916624	0.00564814		0.069966	0.611162	0.643771	0.988521	0.79407	0.638522	171	k__Bacteria;p__Actinobacteria;c__Actinobacteria;o__Actinomycetales;f__Streptosporangiaceae;g__
837	0.917234	0.00565489		0.330436	0.211555	0.695044	0.447595	0.381903	0.592559	861	k__Bacteria;p__Proteobacteria;c__Gammaproteobacteria;o__HOC36;f__;g__
838	0.917758	0.00566165		0.184257	0.98309	0.977274	0.56262	0.668124	0.111362	520	k__Bacteria;p__Firmicutes;c__Clostridia;o__Clostridiales;f__Veillonellaceae;g__BSV43
839	0.919461	0.0056684		0.654874	0.510765	0.980801	0.970699	0.833633	0.942028	938	k__Bacteria;p__Verrucomicrobia;__;__;__;__
840	0.919487	0.00567516		0.35137	0.212331	0.70146	0.492047	0.591892	0.886263	611	k__Bacteria;p__Planctomycetes;c__Planctomycetia;o__Pirellulales;f__Pirellulaceae;g__Rhodopirellula
841	0.920253	0.00568192		0.592546	0.862627	0.616261	0.652252	0.402369	0.19408	453	k__Bacteria;p__Firmicutes;c__Bacilli;o__Bacillales;f__Planococcaceae;g__Rummeliibacillus
842	0.920632	0.00568867		0.448898	0.704369	0.136343	0.242535	0.424832	0.905912	836	k__Bacteria;p__Proteobacteria;c__Gammaproteobacteria;o__Alteromonadales;f__Alteromonadaceae;g__Marinimicrobium
843	0.922031	0.00569543		0.94334	0.650964	0.732747	0.763051	0.714586	0.542689	840	k__Bacteria;p__Proteobacteria;c__Gammaproteobacteria;o__Alteromonadales;f__Idiomarinaceae;g__
844	0.922031	0.00570219		0.94334	0.650964	0.732747	0.763051	0.714586	0.542689	735	k__Bacteria;p__Proteobacteria;c__Betaproteobacteria;o__Burkholderiales;f__Alcaligenaceae;g__Pusillimonas
845	0.922707	0.00570894		0.224283	0.243513	0.745319	0.689599	0.693942	0.15344	40	k__Bacteria;p__Acidobacteria;c__PAUC37f;o__;f__;g__
846	0.923148	0.0057157		0.0151883	0.365049	0.309322	0.444706	0.675641	0.185735	305	k__Bacteria;p__Bacteroidetes;c__[Saprospirae];o__[Saprospirales];__;__
847	0.923662	0.00572245		0.820472	0.777013	0.83024	0.787362	0.804691	0.222977	922	k__Bacteria;p__TM7;c__MJK10;o__;f__;g__
848	0.927381	0.00572921		0.916263	0.112586	0.875869	0.830887	0.982348	0.648005	135	k__Bacteria;p__Actinobacteria;c__Actinobacteria;o__Actinomycetales;f__Micromonosporaceae;g__Solwaraspora
849	0.928938	0.00573597		0.363012	0.880972	0.939281	0.303422	0.870961	0.0795588	524	k__Bacteria;p__Firmicutes;c__Clostridia;o__Clostridiales;f__Veillonellaceae;g__Sporomusa
850	0.929875	0.00574272		0.622214	0.513548	0.680099	0.975922	0.661811	0.822433	494	k__Bacteria;p__Firmicutes;c__Clostridia;o__Clostridiales;f__Clostridiaceae;g__Sarcina
851	0.931916	0.00574948		0.010612	0.243269	0.320146	0.460208	0.646276	0.0706611	176	k__Bacteria;p__Actinobacteria;c__Actinobacteria;o__Actinomycetales;f__Thermomonosporaceae;g__
852	0.933078	0.00575623		0.568874	0.845605	0.623194	0.152988	0.320092	0.0935394	356	k__Bacteria;p__Chloroflexi;c__Anaerolineae;o__envOPS12;f__;g__
853	0.934314	0.00576299		0.233643	0.312813	0.508728	0.811083	0.985567	0.496876	983	k__Bacteria;p__[Thermi];c__Deinococci;o__Deinococcales;f__Deinococcaceae;g__CM44
854	0.939039	0.00576975		0.301964	0.892912	0.141863	0.304937	0.325481	0.880873	704	k__Bacteria;p__Proteobacteria;c__Alphaproteobacteria;o__Rickettsiales;f__Rickettsiaceae;g__
855	0.93962	0.0057765		0.909213	0.692448	0.742918	0.580637	0.823418	0.382687	529	k__Bacteria;p__Firmicutes;c__Clostridia;o__Clostridiales;f__[Tissierellaceae];g__Sedimentibacter
856	0.93962	0.00578326		0.909213	0.692448	0.742918	0.580637	0.823418	0.382687	63	k__Bacteria;p__Actinobacteria;c__Acidimicrobiia;o__Acidimicrobiales;f__Acidimicrobiaceae;g__
857	0.940491	0.00579002		0.785624	0.579082	0.297738	0.243487	0.369048	0.490284	505	k__Bacteria;p__Firmicutes;c__Clostridia;o__Clostridiales;f__Lachnospiraceae;g__Pseudobutyrivibrio
858	0.941384	0.00579677		0.0512645	0.13198	0.713469	0.525351	0.931876	0.743731	331	k__Bacteria;p__Chlorobi;c__SJA-28;o__;f__;g__
859	0.941474	0.00580353		0.575106	0.687349	0.615773	0.647649	0.609061	0.263295	132	k__Bacteria;p__Actinobacteria;c__Actinobacteria;o__Actinomycetales;f__Micromonosporaceae;g__Dactylosporangium
860	0.943193	0.00581028		0.750745	0.710598	0.917857	0.835325	0.824001	0.856502	519	k__Bacteria;p__Firmicutes;c__Clostridia;o__Clostridiales;f__Veillonellaceae;g__
861	0.945502	0.00581704		0.0235213	0.761953	0.0633982	0.115411	0.0527148	0.514166	335	k__Bacteria;p__Chloroflexi;c__Anaerolineae;o__;f__;g__
862	0.945578	0.0058238		0.748535	0.699911	0.0543602	0.0390302	0.0567909	0.60798	332	k__Bacteria;p__Chloroflexi;__;__;__;__
863	0.949301	0.00583055		0.941515	0.925926	0.871768	0.893332	0.84146	0.241903	858	k__Bacteria;p__Proteobacteria;c__Gammaproteobacteria;o__Enterobacteriales;f__Enterobacteriaceae;g__Providencia
864	0.950362	0.00583731		0.370776	0.286343	0.821632	0.706215	0.883902	0.396231	252	k__Bacteria;p__Bacteroidetes;c__Cytophagia;o__Cytophagales;f__Cytophagaceae;g__Cytophaga
865	0.950603	0.00584406		1.03892e-07	0.486806	0.911101	0.673188	0.966054	0.925937	32	k__Bacteria;p__Acidobacteria;c__Acidobacteriia;o__Acidobacteriales;f__Koribacteraceae;__
866	0.950603	0.00585082		1.03892e-07	0.486806	0.911101	0.673188	0.966054	0.925937	925	k__Bacteria;p__TM7;c__TM7-3;__;__;__
867	0.950603	0.00585758		1.03892e-07	0.486806	0.911101	0.673188	0.966054	0.925937	866	k__Bacteria;p__Proteobacteria;c__Gammaproteobacteria;o__Legionellales;f__Coxiellaceae;__
868	0.950603	0.00586433		1.03892e-07	0.486806	0.911101	0.673188	0.966054	0.925937	31	k__Bacteria;p__Acidobacteria;c__Acidobacteriia;o__Acidobacteriales;f__Acidobacteriaceae;g__Terriglobus
869	0.950603	0.00587109		1.03892e-07	0.486806	0.911101	0.673188	0.966054	0.925937	728	k__Bacteria;p__Proteobacteria;c__Betaproteobacteria;o__A21b;f__EB1003;g__
870	0.951039	0.00587785		0.344784	0.897233	0.292369	0.209174	0.435933	0.692651	230	k__Bacteria;p__Bacteroidetes;c__Bacteroidia;o__Bacteroidales;f__Porphyromonadaceae;g__Dysgonomonas
871	0.951303	0.0058846		0.345324	0.897347	0.292909	0.209683	0.436447	0.692977	764	k__Bacteria;p__Proteobacteria;c__Betaproteobacteria;o__Neisseriales;f__Neisseriaceae;g__Vitreoscilla
872	0.953057	0.00589136		0.597637	0.823921	0.501053	0.407976	0.828857	0.326227	844	k__Bacteria;p__Proteobacteria;c__Gammaproteobacteria;o__Alteromonadales;f__[Chromatiaceae];__
873	0.954841	0.00589811		0.34653	0.616689	0.0704149	0.0422086	0.0783919	0.490161	243	k__Bacteria;p__Bacteroidetes;c__Bacteroidia;o__Bacteroidales;f__[Paraprevotellaceae];g__YRC22
874	0.955353	0.00590487		0.9501	0.172348	0.676283	0.944962	0.867701	0.0841623	567	k__Bacteria;p__OD1;c__ABY1;o__;f__;g__
875	0.956666	0.00591163		0.510877	0.431615	0.680541	0.872493	0.77308	0.199365	270	k__Bacteria;p__Bacteroidetes;c__Flavobacteriia;o__Flavobacteriales;f__Cryomorphaceae;g__Brumimicrobium
876	0.956914	0.00591838		0.70669	0.45171	0.539376	0.56255	0.932693	0.126611	845	k__Bacteria;p__Proteobacteria;c__Gammaproteobacteria;o__Alteromonadales;f__[Chromatiaceae];g__
877	0.957048	0.00592514		0.357745	0.899947	0.305371	0.22152	0.448216	0.700411	469	k__Bacteria;p__Firmicutes;c__Bacilli;o__Lactobacillales;f__Enterococcaceae;g__Vagococcus
878	0.958185	0.00593189		0.360546	0.90265	0.308027	0.223722	0.450381	0.700784	902	k__Bacteria;p__Proteobacteria;c__Gammaproteobacteria;o__Xanthomonadales;f__Xanthomonadaceae;g__Ignatzschineria
879	0.959977	0.00593865		0.805535	0.88627	0.670288	0.63435	0.972489	0.168129	878	k__Bacteria;p__Proteobacteria;c__Gammaproteobacteria;o__Oceanospirillales;f__Alcanivoracaceae;g__Alcanivorax
880	0.960027	0.00594541		0.364775	0.901394	0.312454	0.228308	0.45484	0.704559	533	k__Bacteria;p__Firmicutes;c__Erysipelotrichi;o__Erysipelotrichales;f__Erysipelotrichaceae;g__Erysipelothrix
881	0.960611	0.00595216		0.62621	0.653258	0.845559	0.82489	0.836834	0.197775	582	k__Bacteria;p__Planctomycetes;c__OM190;o__;f__;g__
882	0.960652	0.00595892		0.515252	0.776133	0.144663	0.142435	0.38116	0.742242	72	k__Bacteria;p__Actinobacteria;c__Actinobacteria;__;__;__
883	0.963143	0.00596568		0.027876	0.375416	0.16967	0.239494	0.270194	0.184287	903	k__Bacteria;p__Proteobacteria;c__Gammaproteobacteria;o__Xanthomonadales;f__Xanthomonadaceae;g__Luteibacter
884	0.963363	0.00597243		0.936946	0.0744031	0.342623	0.805997	0.282466	0.596199	178	k__Bacteria;p__Actinobacteria;c__Actinobacteria;o__Actinomycetales;f__Thermomonosporaceae;g__Actinocorallia
885	0.963489	0.00597919		0.923603	0.331393	0.358622	0.160721	0.597079	0.633719	229	k__Bacteria;p__Bacteroidetes;c__Bacteroidia;o__Bacteroidales;f__Porphyromonadaceae;g__
886	0.964678	0.00598594		0.358655	0.471343	0.902954	0.86176	0.961847	0.484342	613	k__Bacteria;p__Planctomycetes;c__vadinHA49;o__DH61;f__;g__
887	0.965309	0.0059927		0.123735	0.791781	0.422175	0.538603	0.280122	0.341599	458	k__Bacteria;p__Firmicutes;c__Bacilli;o__Bacillales;f__Thermoactinomycetaceae;g__
888	0.965633	0.00599946		0.929934	0.0870249	0.833679	0.842332	0.994542	0.812918	917	k__Bacteria;p__TM6;__;__;__;__
889	0.965633	0.00600621		0.929934	0.0870249	0.833679	0.842332	0.994542	0.812918	216	k__Bacteria;p__Armatimonadetes;c__[Fimbriimonadia];o__[Fimbriimonadales];f__[Fimbriimonadaceae];__
890	0.966024	0.00601297		0.000499222	0.344234	0.918841	0.566713	0.666208	0.762508	81	k__Bacteria;p__Actinobacteria;c__Actinobacteria;o__Actinomycetales;f__Actinosynnemataceae;g__Saccharothrix
891	0.966288	0.00601972		0.104097	0.377384	0.0640651	0.00432919	0.079367	0.526525	957	k__Bacteria;p__Verrucomicrobia;c__[Pedosphaerae];o__[Pedosphaerales];__;__
892	0.966655	0.00602648		0.494906	0.84026	0.864429	0.791589	0.77425	0.430702	581	k__Bacteria;p__Planctomycetes;c__C6;o__d113;f__;g__
893	0.96672	0.00603324		0.574528	0.933465	0.346352	0.353334	0.355915	0.406798	973	k__Bacteria;p__Verrucomicrobia;c__[Spartobacteria];o__[Chthoniobacterales];f__[Chthoniobacteraceae];g__heteroC45_4W
894	0.967498	0.00603999		0.176702	0.596294	0.675661	0.674084	0.69663	0.650746	406	k__Bacteria;p__Cyanobacteria;c__Chloroplast;o__Chlorophyta;f__;g__
895	0.967675	0.00604675		0.0408017	0.319025	0.0991494	0.00973735	0.163413	0.678422	825	k__Bacteria;p__Proteobacteria;c__Gammaproteobacteria;o__34P16;f__;g__
896	0.970089	0.0060535		0.35795	0.982331	0.29992	0.212167	0.415083	0.749243	283	k__Bacteria;p__Bacteroidetes;c__Flavobacteriia;o__Flavobacteriales;f__Flavobacteriaceae;g__Myroides
897	0.971456	0.00606026		0.779269	0.900659	0.692517	0.681293	0.967601	0.25622	830	k__Bacteria;p__Proteobacteria;c__Gammaproteobacteria;o__Alteromonadales;f__;g__
898	0.971456	0.00606702		0.779269	0.900659	0.692517	0.681293	0.967601	0.25622	624	k__Bacteria;p__Proteobacteria;c__Alphaproteobacteria;o__Caulobacterales;f__Caulobacteraceae;g__Brevundimonas
899	0.971456	0.00607377		0.779269	0.900659	0.692517	0.681293	0.967601	0.25622	841	k__Bacteria;p__Proteobacteria;c__Gammaproteobacteria;o__Alteromonadales;f__Idiomarinaceae;g__Pseudidiomarina
900	0.971456	0.00608053		0.779269	0.900659	0.692517	0.681293	0.967601	0.25622	877	k__Bacteria;p__Proteobacteria;c__Gammaproteobacteria;o__Oceanospirillales;f__;g__
901	0.971456	0.00608729		0.779269	0.900659	0.692517	0.681293	0.967601	0.25622	669	k__Bacteria;p__Proteobacteria;c__Alphaproteobacteria;o__Rhizobiales;f__Rhizobiaceae;g__Shinella
902	0.971456	0.00609404		0.779269	0.900659	0.692517	0.681293	0.967601	0.25622	831	k__Bacteria;p__Proteobacteria;c__Gammaproteobacteria;o__Alteromonadales;f__Alteromonadaceae;__
903	0.971456	0.0061008		0.779269	0.900659	0.692517	0.681293	0.967601	0.25622	846	k__Bacteria;p__Proteobacteria;c__Gammaproteobacteria;o__Alteromonadales;f__[Chromatiaceae];g__Alishewanella
904	0.972539	0.00610755		0.858566	0.289828	0.926497	0.995023	0.903178	0.631292	593	k__Bacteria;p__Planctomycetes;c__Phycisphaerae;o__SHUX583;f__;g__
905	0.972604	0.00611431		0.810165	0.812205	0.793758	0.690614	0.992154	0.864455	431	k__Bacteria;p__Firmicutes;__;__;__;__
906	0.972604	0.00612107		0.810165	0.812205	0.793758	0.690614	0.992154	0.864455	315	k__Bacteria;p__Chlamydiae;c__Chlamydiia;__;__;__
907	0.976803	0.00612782		0.499749	0.900828	0.487395	0.404668	0.502869	0.690132	462	k__Bacteria;p__Firmicutes;c__Bacilli;o__Lactobacillales;__;__
908	0.977175	0.00613458		0.739768	0.32118	0.0508721	0.102061	0.0141276	0.61564	864	k__Bacteria;p__Proteobacteria;c__Gammaproteobacteria;o__Legionellales;__;__
909	0.977896	0.00614133		0.653273	0.699887	0.732839	0.683941	0.862846	0.115367	954	k__Bacteria;p__Verrucomicrobia;c__Verrucomicrobiae;o__Verrucomicrobiales;f__Verrucomicrobiaceae;g__Verrucomicrobium
910	0.97847	0.00614809		0.625362	0.811691	0.828627	0.871601	0.861662	0.570974	876	k__Bacteria;p__Proteobacteria;c__Gammaproteobacteria;o__Methylococcales;f__Methylococcaceae;g__
911	0.97847	0.00615485		0.625362	0.811691	0.828627	0.871601	0.861662	0.570974	79	k__Bacteria;p__Actinobacteria;c__Actinobacteria;o__Actinomycetales;f__Actinosynnemataceae;g__Actinokineospora
912	0.97847	0.0061616		0.625362	0.811691	0.828627	0.871601	0.861662	0.570974	224	k__Bacteria;p__Bacteroidetes;c__BME43;o__;f__;g__
913	0.979156	0.00616836		0.299866	0.357378	0.786525	0.58415	0.507282	0.619508	667	k__Bacteria;p__Proteobacteria;c__Alphaproteobacteria;o__Rhizobiales;f__Rhizobiaceae;g__Kaistia
914	0.979881	0.00617512		0.0241496	0.372278	0.9662	0.31464	0.617133	0.000957629	18	k__Bacteria;p__;c__;o__;f__;g__
915	0.980103	0.00618187		0.348792	0.140523	0.542259	0.35911	0.463041	0.570084	59	k__Bacteria;p__Actinobacteria;__;__;__;__
916	0.980245	0.00618863		0.0678994	0.452857	0.389624	0.475582	0.720061	0.317825	233	k__Bacteria;p__Bacteroidetes;c__Bacteroidia;o__Bacteroidales;f__Prevotellaceae;__
917	0.980245	0.00619538		0.0678994	0.452857	0.389624	0.475582	0.720061	0.317825	272	k__Bacteria;p__Bacteroidetes;c__Flavobacteriia;o__Flavobacteriales;f__Cryomorphaceae;g__Cryomorpha
918	0.980495	0.00620214		0.406724	0.321841	0.758496	0.620899	0.756398	0.545013	744	k__Bacteria;p__Proteobacteria;c__Betaproteobacteria;o__Burkholderiales;f__Comamonadaceae;g__Polaromonas
919	0.981083	0.0062089		0.225052	0.17997	0.727567	0.616033	0.743384	0.538087	112	k__Bacteria;p__Actinobacteria;c__Actinobacteria;o__Actinomycetales;f__Microbacteriaceae;__
920	0.981791	0.00621565		0.0801776	0.703874	0.977554	0.920571	0.769247	0.57135	703	k__Bacteria;p__Proteobacteria;c__Alphaproteobacteria;o__Rickettsiales;f__Rickettsiaceae;__
921	0.981829	0.00622241		0.886761	0.911521	0.906179	0.965872	0.793704	0.368126	99	k__Bacteria;p__Actinobacteria;c__Actinobacteria;o__Actinomycetales;f__Geodermatophilaceae;g__Blastococcus
922	0.981829	0.00622916		0.886761	0.911521	0.906179	0.965872	0.793704	0.368126	26	k__Bacteria;p__Acidobacteria;c__Acidobacteria-6;o__iii1-15;__;__
923	0.981829	0.00623592		0.886761	0.911521	0.906179	0.965872	0.793704	0.368126	879	k__Bacteria;p__Proteobacteria;c__Gammaproteobacteria;o__Oceanospirillales;f__Hahellaceae;g__Hahella
924	0.981829	0.00624268		0.886761	0.911521	0.906179	0.965872	0.793704	0.368126	765	k__Bacteria;p__Proteobacteria;c__Betaproteobacteria;o__Nitrosomonadales;f__Nitrosomonadaceae;__
925	0.981829	0.00624943		0.886761	0.911521	0.906179	0.965872	0.793704	0.368126	148	k__Bacteria;p__Actinobacteria;c__Actinobacteria;o__Actinomycetales;f__Nocardioidaceae;g__Marmoricola
926	0.982556	0.00625619		0.199004	0.53883	0.920516	0.216259	0.389355	2.0365e-08	45	k__Bacteria;p__Acidobacteria;c__Solibacteres;o__Solibacterales;f__AKIW659;g__
927	0.982556	0.00626295		0.199004	0.53883	0.920516	0.216259	0.389355	2.0365e-08	497	k__Bacteria;p__Firmicutes;c__Clostridia;o__Clostridiales;f__Gracilibacteraceae;g__Gracilibacter
928	0.983086	0.0062697		0.465026	0.948413	0.888167	0.915706	0.930812	0.972754	493	k__Bacteria;p__Firmicutes;c__Clostridia;o__Clostridiales;f__Clostridiaceae;g__SMB53
929	0.983086	0.00627646		0.465026	0.948413	0.888167	0.915706	0.930812	0.972754	734	k__Bacteria;p__Proteobacteria;c__Betaproteobacteria;o__Burkholderiales;f__Alcaligenaceae;g__Alcaligenes
930	0.984683	0.00628321		0.182175	0.913659	0.873766	0.858667	0.932627	0.982553	291	k__Bacteria;p__Bacteroidetes;c__Flavobacteriia;o__Flavobacteriales;f__[Weeksellaceae];g__Chryseobacterium
931	0.984917	0.00628997		0.120768	0.540185	0.0817927	0.0090254	0.108958	0.348964	535	k__Bacteria;p__Fusobacteria;c__Fusobacteriia;o__Fusobacteriales;f__;g__
932	0.984917	0.00629673		0.120768	0.540185	0.0817927	0.0090254	0.108958	0.348964	787	k__Bacteria;p__Proteobacteria;c__Deltaproteobacteria;o__Desulfuromonadales;f__Pelobacteraceae;__
933	0.984917	0.00630348		0.120768	0.540185	0.0817927	0.0090254	0.108958	0.348964	850	k__Bacteria;p__Proteobacteria;c__Gammaproteobacteria;o__Chromatiales;f__Ectothiorhodospiraceae;__
934	0.984917	0.00631024		0.120768	0.540185	0.0817927	0.0090254	0.108958	0.348964	942	k__Bacteria;p__Verrucomicrobia;c__Opitutae;o__Opitutales;f__Opitutaceae;__
935	0.985206	0.00631699		0.186488	0.746006	0.55453	0.900327	0.920198	0.412328	606	k__Bacteria;p__Planctomycetes;c__Planctomycetia;o__Gemmatales;f__Isosphaeraceae;g__Singulisphaera
936	0.985916	0.00632375		0.866925	0.85614	0.345876	0.323919	0.591397	0.705523	894	k__Bacteria;p__Proteobacteria;c__Gammaproteobacteria;o__Xanthomonadales;f__Sinobacteraceae;g__Hydrocarboniphaga
937	0.988634	0.00633051		0.673357	0.771197	0.811846	0.983317	0.798872	0.765482	915	k__Bacteria;p__SR1;c__;o__;f__;g__
938	0.988634	0.00633726		0.673357	0.771197	0.811846	0.983317	0.798872	0.765482	918	k__Bacteria;p__TM6;c__F38;o__;f__;g__
939	0.988814	0.00634402		0.470821	0.893871	0.962817	0.702148	0.829027	0.617345	575	k__Bacteria;p__OP3;c__koll11;o__GIF10;f__kpj58rc;g__
940	0.990691	0.00635078		0.519824	0.982119	0.973914	0.883907	0.885416	0.856471	966	k__Bacteria;p__Verrucomicrobia;c__[Spartobacteria];o__[Chthoniobacterales];f__[Chthoniobacteraceae];__
941	0.990817	0.00635753		0.516919	0.0378769	0.638442	0.703899	0.86489	0.0801102	380	k__Bacteria;p__Chloroflexi;c__S085;o__;f__;g__
942	0.99119	0.00636429		2.80558e-05	0.545284	0.28386	0.471124	0.0502222	0.816644	929	k__Bacteria;p__TM7;c__TM7-3;o__I025;f__;g__
943	0.992088	0.00637104		0.00214798	0.769794	0.988465	0.245561	0.58083	0.000364641	357	k__Bacteria;p__Chloroflexi;c__Anaerolineae;o__pLW-97;f__;g__
944	0.992138	0.0063778		0.49499	0.570951	0.640182	0.83674	0.936314	0.931061	887	k__Bacteria;p__Proteobacteria;c__Gammaproteobacteria;o__Pseudomonadales;f__Pseudomonadaceae;g__Pseudomonas
945	0.992337	0.00638456		0.24173	0.506224	0.676103	0.878094	0.9346	0.502062	248	k__Bacteria;p__Bacteroidetes;c__Cytophagia;o__Cytophagales;f__Cyclobacteriaceae;g__Algoriphagus
946	0.992337	0.00639131		0.24173	0.506224	0.676103	0.878094	0.9346	0.502062	287	k__Bacteria;p__Bacteroidetes;c__Flavobacteriia;o__Flavobacteriales;f__Flavobacteriaceae;g__Winogradskyella
947	0.992337	0.00639807		0.24173	0.506224	0.676103	0.878094	0.9346	0.502062	916	k__Bacteria;p__Spirochaetes;c__Spirochaetes;o__Spirochaetales;f__Spirochaetaceae;g__
948	0.992337	0.00640482		0.24173	0.506224	0.676103	0.878094	0.9346	0.502062	937	k__Bacteria;p__Tenericutes;c__RF3;o__ML615J-28;f__;g__
949	0.99234	0.00641158		0.509587	0.928162	0.46234	0.380687	0.586558	0.782618	39	k__Bacteria;p__Acidobacteria;c__DA052;o__Ellin6513;f__;g__
950	0.99234	0.00641834		0.509587	0.928162	0.46234	0.380687	0.586558	0.782618	239	k__Bacteria;p__Bacteroidetes;c__Bacteroidia;o__Bacteroidales;f__[Odoribacteraceae];g__Odoribacter
951	0.99234	0.00642509		0.509587	0.928162	0.46234	0.380687	0.586558	0.782618	528	k__Bacteria;p__Firmicutes;c__Clostridia;o__Clostridiales;f__[Tissierellaceae];g__Helcococcus
952	0.99234	0.00643185		0.509587	0.928162	0.46234	0.380687	0.586558	0.782618	931	k__Bacteria;p__Tenericutes;c__Mollicutes;o__Acholeplasmatales;f__Acholeplasmataceae;g__Acholeplasma
953	0.992616	0.00643861		0.633229	0.974344	0.935887	0.549082	0.760988	0.334105	33	k__Bacteria;p__Acidobacteria;c__Acidobacteriia;o__Acidobacteriales;f__Koribacteraceae;g__
954	0.993857	0.00644536		0.387112	0.552942	0.473333	0.547909	0.404242	0.352027	857	k__Bacteria;p__Proteobacteria;c__Gammaproteobacteria;o__Enterobacteriales;f__Enterobacteriaceae;g__Pantoea
955	0.993857	0.00645212		0.387112	0.552942	0.473333	0.547909	0.404242	0.352027	741	k__Bacteria;p__Proteobacteria;c__Betaproteobacteria;o__Burkholderiales;f__Comamonadaceae;g__Azohydromonas
956	0.994139	0.00645887		0.690059	0.491678	0.974486	0.985321	0.728219	0.31449	43	k__Bacteria;p__Acidobacteria;c__Solibacteres;o__Solibacterales;__;__
957	0.994139	0.00646563		0.690059	0.491678	0.974486	0.985321	0.728219	0.31449	167	k__Bacteria;p__Actinobacteria;c__Actinobacteria;o__Actinomycetales;f__Sporichthyaceae;g__Sporichthya
958	0.994139	0.00647239		0.690059	0.491678	0.974486	0.985321	0.728219	0.31449	404	k__Bacteria;p__Cyanobacteria;c__Chloroplast;__;__;__
959	0.994327	0.00647914		0.417599	0.70623	0.986771	0.471285	0.642299	0.0617971	41	k__Bacteria;p__Acidobacteria;c__RB25;o__;f__;g__
960	0.997366	0.0064859		0.426457	0.758179	0.38824	0.259066	0.427936	0.891404	532	k__Bacteria;p__Firmicutes;c__Erysipelotrichi;o__Erysipelotrichales;f__Erysipelotrichaceae;g__
961	0.997634	0.00649265		0.990581	0.636836	0.924227	0.842284	0.822607	0.974955	475	k__Bacteria;p__Firmicutes;c__Bacilli;o__Lactobacillales;f__Leuconostocaceae;g__Oenococcus
962	0.997634	0.00649941		0.990581	0.636836	0.924227	0.842284	0.822607	0.974955	600	k__Bacteria;p__Planctomycetes;c__Planctomycetia;o__Gemmatales;__;__
963	0.997634	0.00650617		0.990581	0.636836	0.924227	0.842284	0.822607	0.974955	620	k__Bacteria;p__Proteobacteria;c__Alphaproteobacteria;o__Caulobacterales;__;__
964	0.997634	0.00651292		0.990581	0.636836	0.924227	0.842284	0.822607	0.974955	823	k__Bacteria;p__Proteobacteria;c__Epsilonproteobacteria;o__Campylobacterales;f__Helicobacteraceae;g__Helicobacter
965	0.998083	0.00651968		0.00525828	0.843454	0.924691	0.267304	0.515041	0.000843224	355	k__Bacteria;p__Chloroflexi;c__Anaerolineae;o__WCHB1-50;f__;g__
966	0.998311	0.00652643		0.882184	0.559677	0.651442	0.598686	0.542226	0.501126	417	k__Bacteria;p__Cyanobacteria;c__Oscillatoriophycideae;o__Chroococcales;f__Xenococcaceae;g__
967	0.998311	0.00653319		0.882184	0.559677	0.651442	0.598686	0.542226	0.501126	473	k__Bacteria;p__Firmicutes;c__Bacilli;o__Lactobacillales;f__Lactobacillaceae;g__Pediococcus
968	0.998544	0.00653995		0.861736	0.241998	0.873141	0.751077	0.637893	0.807282	412	k__Bacteria;p__Cyanobacteria;c__Chloroplast;o__Streptophyta;f__;g__
969	0.998563	0.0065467		0.0233151	0.581931	0.933156	0.321214	0.530904	0.00558053	963	k__Bacteria;p__Verrucomicrobia;c__[Pedosphaerae];o__[Pedosphaerales];f__auto67_4W;g__
970	0.998651	0.00655346		0.682991	0.710331	0.327875	0.298008	0.546983	0.707895	466	k__Bacteria;p__Firmicutes;c__Bacilli;o__Lactobacillales;f__Carnobacteriaceae;g__Carnobacterium
971	0.998804	0.00656022		0.0721887	0.818511	0.996575	0.449032	0.710108	0.01723	125	k__Bacteria;p__Actinobacteria;c__Actinobacteria;o__Actinomycetales;f__Micrococcaceae;g__Sinomonas
972	0.998804	0.00656697		0.0721887	0.818511	0.996575	0.449032	0.710108	0.01723	362	k__Bacteria;p__Chloroflexi;c__Chloroflexi;o__Chloroflexales;f__01D2Z48;g__
973	0.998804	0.00657373		0.0721887	0.818511	0.996575	0.449032	0.710108	0.01723	597	k__Bacteria;p__Planctomycetes;c__Pla4;o__;f__;g__
974	0.998804	0.00658048		0.0721887	0.818511	0.996575	0.449032	0.710108	0.01723	695	k__Bacteria;p__Proteobacteria;c__Alphaproteobacteria;o__Rhodospirillales;f__Rhodospirillaceae;g__Magnetospirillum
975	0.998804	0.00658724		0.0721887	0.818511	0.996575	0.449032	0.710108	0.01723	946	k__Bacteria;p__Verrucomicrobia;c__Opitutae;o__[Cerasicoccales];f__[Cerasicoccaceae];g__
976	0.999792	0.006594		0.0214102	0.485359	0.998402	0.266872	0.709634	0.00339225	187	k__Bacteria;p__Actinobacteria;c__MB-A2-108;o__0319-7L14;f__;g__
977	0.999874	0.00660075		0.467674	0.474898	0.501494	0.938929	0.671419	0.218332	854	k__Bacteria;p__Proteobacteria;c__Gammaproteobacteria;o__Enterobacteriales;f__Enterobacteriaceae;g__Buchnera
978	NA	0.00660751		NA	NA	NA	NA	NA	NA	2	k__Archaea;p__Crenarchaeota;c__Aigarchaeota;o__;f__;g__
979	NA	0.00661426		NA	NA	NA	NA	NA	NA	50	k__Bacteria;p__Acidobacteria;c__Solibacteres;o__Solibacterales;f__[Bryobacteraceae];g__
980	NA	0.00662102		NA	NA	NA	NA	NA	NA	73	k__Bacteria;p__Actinobacteria;c__Actinobacteria;o__;f__;g__
981	NA	0.00662778		NA	NA	NA	NA	NA	NA	328	k__Bacteria;p__Chlorobi;c__BSV26;o__C20;f__;g__
982	NA	0.00663453		NA	NA	NA	NA	NA	NA	474	k__Bacteria;p__Firmicutes;c__Bacilli;o__Lactobacillales;f__Leuconostocaceae;g__
983	NA	0.00664129		NA	NA	NA	NA	NA	NA	476	k__Bacteria;p__Firmicutes;c__Bacilli;o__Lactobacillales;f__Leuconostocaceae;g__Weissella
984	NA	0.00664805		NA	NA	NA	NA	NA	NA	487	k__Bacteria;p__Firmicutes;c__Clostridia;o__Clostridiales;f__Clostridiaceae;g__Alkaliphilus
985	NA	0.0066548		NA	NA	NA	NA	NA	NA	509	k__Bacteria;p__Firmicutes;c__Clostridia;o__Clostridiales;f__Peptococcaceae;g__Desulfotomaculum
986	NA	0.00666156		NA	NA	NA	NA	NA	NA	536	k__Bacteria;p__GAL15;c__;o__;f__;g__
987	NA	0.00666831		NA	NA	NA	NA	NA	NA	680	k__Bacteria;p__Proteobacteria;c__Alphaproteobacteria;o__Rhodobacterales;f__Rhodobacteraceae;g__Anaerospora
988	NA	0.00667507		NA	NA	NA	NA	NA	NA	773	k__Bacteria;p__Proteobacteria;c__Betaproteobacteria;o__Tremblayales;f__Tremblayaceae;g__
989	NA	0.00668183		NA	NA	NA	NA	NA	NA	785	k__Bacteria;p__Proteobacteria;c__Deltaproteobacteria;o__Desulfuromonadales;f__Geobacteraceae;g__
990	NA	0.00668858		NA	NA	NA	NA	NA	NA	883	k__Bacteria;p__Proteobacteria;c__Gammaproteobacteria;o__Pseudomonadales;f__Moraxellaceae;__
