# Supplementary material for: Fine-Scale Spatial Structure of Soil Microbial Communities in Burrows of a Keystone Rodent Following Mass Mortality
Source: Frontiers journal article supplement (doi:10.3389/fevo.2021.758348), 2021-10-15
Supplement: Table_2.XLSX [file Table_2.XLSX]

## Sheet: spatially significant genera
rank_p_category	p_category	kingdom	phylum	class	order	family	genus
2	6.27862e-18	k__Bacteria	p__[Thermi]	c__Deinococci	o__Deinococcales	f__Deinococcaceae	g__Deinococcus
74	0.000473968	k__Bacteria	p__Acidobacteria	c__Acidobacteria-6	o__iii1-15	f__	g__
31	1.83481e-05	k__Bacteria	p__Acidobacteria	c__BPC102	o__MVS-40	f__	g__
36	3.0771e-05	k__Bacteria	p__Acidobacteria	c__Solibacteres	o__Solibacterales	f__	g__
48	8.63052e-05	k__Bacteria	p__Acidobacteria	c__Solibacteres	o__Solibacterales	f__PAUC26f	g__
50	0.00010022	k__Bacteria	p__Acidobacteria	c__Sva0725	o__Sva0725	f__	g__
19	1.63152e-06	k__Bacteria	p__Actinobacteria	c__Acidimicrobiia	o__Acidimicrobiales	f__	g__
71	0.000432943	k__Bacteria	p__Actinobacteria	c__Actinobacteria	o__Actinomycetales	f__Geodermatophilaceae	g__
13	3.97044e-07	k__Bacteria	p__Actinobacteria	c__Actinobacteria	o__Actinomycetales	f__Geodermatophilaceae	g__Geodermatophilus
18	1.60023e-06	k__Bacteria	p__Actinobacteria	c__Actinobacteria	o__Actinomycetales	f__Geodermatophilaceae	g__Modestobacter
29	1.7171e-05	k__Bacteria	p__Actinobacteria	c__Actinobacteria	o__Actinomycetales	f__Intrasporangiaceae	__
76	0.000503931	k__Bacteria	p__Actinobacteria	c__Actinobacteria	o__Actinomycetales	f__Intrasporangiaceae	g__
44	7.54727e-05	k__Bacteria	p__Actinobacteria	c__Actinobacteria	o__Actinomycetales	f__Micromonosporaceae	g__
59	0.000189611	k__Bacteria	p__Actinobacteria	c__Actinobacteria	o__Actinomycetales	f__Micromonosporaceae	g__Virgisporangium
66	0.000357119	k__Bacteria	p__Actinobacteria	c__Actinobacteria	o__Actinomycetales	f__Mycobacteriaceae	g__Mycobacterium
25	6.11383e-06	k__Bacteria	p__Actinobacteria	c__Actinobacteria	o__Actinomycetales	f__Nocardioidaceae	g__Pimelobacter
4	4.50087e-15	k__Bacteria	p__Actinobacteria	c__Actinobacteria	o__Actinomycetales	f__Promicromonosporaceae	g__Cellulosimicrobium
15	8.61555e-07	k__Bacteria	p__Actinobacteria	c__Actinobacteria	o__Actinomycetales	f__Sporichthyaceae	g__
60	0.000210467	k__Bacteria	p__Actinobacteria	c__Actinobacteria	o__Actinomycetales	f__Streptosporangiaceae	g__Sphaerisporangium
23	4.92918e-06	k__Bacteria	p__Actinobacteria	c__Rubrobacteria	o__Rubrobacterales	f__Rubrobacteraceae	g__Rubrobacter
46	7.99869e-05	k__Bacteria	p__Bacteroidetes	c__[Rhodothermi]	o__[Rhodothermales]	f__Rhodothermaceae	g__
45	7.69083e-05	k__Bacteria	p__Bacteroidetes	c__[Saprospirae]	o__[Saprospirales]	f__Chitinophagaceae	g__Niabella
28	1.60907e-05	k__Bacteria	p__Bacteroidetes	c__Cytophagia	o__Cytophagales	f__Cytophagaceae	g__Pontibacter
68	0.000381902	k__Bacteria	p__Bacteroidetes	c__Flavobacteriia	o__Flavobacteriales	f__Flavobacteriaceae	g__Flavobacterium
75	0.000487189	k__Bacteria	p__Bacteroidetes	c__Sphingobacteriia	o__Sphingobacteriales	f__Sphingobacteriaceae	g__
62	0.000279651	k__Bacteria	p__Bacteroidetes	c__Sphingobacteriia	o__Sphingobacteriales	f__Sphingobacteriaceae	g__Sphingobacterium
69	0.000408007	k__Bacteria	p__Chloroflexi	c__	o__	f__	g__
51	0.000100459	k__Bacteria	p__Chloroflexi	c__Anaerolineae	o__DRC31	f__	g__
73	0.000449821	k__Bacteria	p__Chloroflexi	c__Anaerolineae	o__H39	f__	g__
72	0.000444907	k__Bacteria	p__Chloroflexi	c__Chloroflexi	o__[Roseiflexales]	f__	g__
35	2.77149e-05	k__Bacteria	p__Chloroflexi	c__Chloroflexi	o__[Roseiflexales]	f__[Kouleothrixaceae]	g__Kouleothrix
1	1.93246e-25	k__Bacteria	p__Chloroflexi	c__Chloroflexi	o__AKIW781	f__	g__
57	0.000150715	k__Bacteria	p__Chloroflexi	c__Thermomicrobia	o__	f__	g__
47	8.46447e-05	k__Bacteria	p__Chloroflexi	c__TK10	o__B07_WMSP1	__	__
27	1.57069e-05	k__Bacteria	p__Cyanobacteria	c__	o__	f__	g__
56	0.000150131	k__Bacteria	p__Cyanobacteria	c__Chloroplast	o__Chlorophyta	f__Chlamydomonadaceae	g__
8	3.1501e-09	k__Bacteria	p__Cyanobacteria	c__Nostocophycideae	o__Nostocales	f__Nostocaceae	g__Nostoc
40	4.0045e-05	k__Bacteria	p__Cyanobacteria	c__Nostocophycideae	o__Nostocales	f__Scytonemataceae	g__
41	4.0045e-05	k__Bacteria	p__Cyanobacteria	c__Oscillatoriophycideae	o__Oscillatoriales	f__Phormidiaceae	__
37	4.0045e-05	k__Bacteria	p__Cyanobacteria	c__Oscillatoriophycideae	o__Oscillatoriales	f__Phormidiaceae	g__Microcoleus
9	2.50589e-08	k__Bacteria	p__Cyanobacteria	c__Oscillatoriophycideae	o__Oscillatoriales	f__Phormidiaceae	g__Phormidium
5	1.56162e-12	k__Bacteria	p__FBP	c__	o__	f__	g__
3	5.47413e-16	k__Bacteria	p__Firmicutes	c__Bacilli	o__Bacillales	f__Planococcaceae	g__
63	0.000291819	k__Bacteria	p__Firmicutes	c__Bacilli	o__Bacillales	f__Planococcaceae	g__Planomicrobium
65	0.000324272	k__Bacteria	p__Gemmatimonadetes	c__Gemm-2	o__	f__	g__
14	8.02636e-07	k__Bacteria	p__Gemmatimonadetes	c__Gemm-3	o__	f__	g__
10	2.91551e-08	k__Bacteria	p__Gemmatimonadetes	c__Gemm-4	o__	f__	g__
30	1.77997e-05	k__Bacteria	p__Gemmatimonadetes	c__Gemm-5	o__	f__	g__
7	1.85826e-09	k__Bacteria	p__Gemmatimonadetes	c__Gemmatimonadetes	__	__	__
32	2.0682e-05	k__Bacteria	p__Gemmatimonadetes	c__Gemmatimonadetes	o__Gemmatimonadales	f__	g__
42	5.83075e-05	k__Bacteria	p__OP11	c__	o__	f__	g__
64	0.000320386	k__Bacteria	p__Planctomycetes	c__BD7-11	o__	f__	g__
52	0.000109808	k__Bacteria	p__Planctomycetes	c__Phycisphaerae	o__WD2101	f__	g__
67	0.000375989	k__Bacteria	p__Planctomycetes	c__Planctomycetia	o__Gemmatales	f__Gemmataceae	g__Gemmata
43	7.52061e-05	k__Bacteria	p__Planctomycetes	c__Planctomycetia	o__Gemmatales	f__Isosphaeraceae	g__
34	2.70446e-05	k__Bacteria	p__Proteobacteria	c__Alphaproteobacteria	__	__	__
33	2.21297e-05	k__Bacteria	p__Proteobacteria	c__Alphaproteobacteria	o__Rhizobiales	f__	g__
26	8.84082e-06	k__Bacteria	p__Proteobacteria	c__Alphaproteobacteria	o__Rhizobiales	f__Beijerinckiaceae	g__
21	2.60452e-06	k__Bacteria	p__Proteobacteria	c__Alphaproteobacteria	o__Rhizobiales	f__Bradyrhizobiaceae	g__
53	0.000111535	k__Bacteria	p__Proteobacteria	c__Alphaproteobacteria	o__Rhizobiales	f__Bradyrhizobiaceae	g__Balneimonas
17	1.11703e-06	k__Bacteria	p__Proteobacteria	c__Alphaproteobacteria	o__Rhizobiales	f__Rhizobiaceae	__
12	3.09308e-07	k__Bacteria	p__Proteobacteria	c__Alphaproteobacteria	o__Rhizobiales	f__Rhodobiaceae	g__Afifella
24	6.00385e-06	k__Bacteria	p__Proteobacteria	c__Alphaproteobacteria	o__Rhodobacterales	f__Rhodobacteraceae	g__Paracoccus
11	1.99019e-07	k__Bacteria	p__Proteobacteria	c__Alphaproteobacteria	o__Rhodospirillales	f__Acetobacteraceae	g__Roseomonas
70	0.000409536	k__Bacteria	p__Proteobacteria	c__Alphaproteobacteria	o__Sphingomonadales	f__Sphingomonadaceae	g__Sphingopyxis
38	4.0045e-05	k__Bacteria	p__Proteobacteria	c__Betaproteobacteria	o__Burkholderiales	f__Comamonadaceae	g__Rhodoferax
58	0.00017748	k__Bacteria	p__Proteobacteria	c__Betaproteobacteria	o__Ellin6067	f__	g__
54	0.000130816	k__Bacteria	p__Proteobacteria	c__Betaproteobacteria	o__Hydrogenophilales	f__Hydrogenophilaceae	g__Thiobacillus
39	4.0045e-05	k__Bacteria	p__Proteobacteria	c__Betaproteobacteria	o__Methylophilales	f__	g__
22	3.17639e-06	k__Bacteria	p__Proteobacteria	c__Betaproteobacteria	o__Rhodocyclales	f__Rhodocyclaceae	g__Azoarcus
20	2.16056e-06	k__Bacteria	p__Proteobacteria	c__Betaproteobacteria	o__SC-I-84	f__	g__
6	1.68957e-10	k__Bacteria	p__Proteobacteria	c__Deltaproteobacteria	o__Myxococcales	f__Cystobacteraceae	__
16	1.06909e-06	k__Bacteria	p__Proteobacteria	c__Gammaproteobacteria	o__[Marinicellales]	f__[Marinicellaceae]	g__
49	8.84824e-05	k__Bacteria	p__Proteobacteria	c__Gammaproteobacteria	o__Chromatiales	f__Ectothiorhodospiraceae	g__
55	0.00013267	k__Bacteria	p__Proteobacteria	c__Gammaproteobacteria	o__HTCC2188	f__HTCC2089	g__
61	0.000225875	k__Bacteria	p__SBR1093	c__VHS-B5-50	o__	f__	g__
