# Supplementary material for: Fine-Scale Spatial Structure of Soil Microbial Communities in Burrows of a Keystone Rodent Following Mass Mortality
Source: Frontiers journal article supplement (doi:10.3389/fevo.2021.758348), 2021-10-15
Supplement: Table_3.XLSX [file Table_3.XLSX]

## Sheet: glmANOVA_pvalues_families
rank_category_p	category_p	Benjamini-Yekutieli		pH_p	moisture_p	C_p	N_p	C:N_p	C*N_p	taxon_num	taxon	these p values are from Anova of a glm testing the inclusive model for variation in proportional abundance of each taxon
1	6.17289e-28	1.27978e-05	alpha	0.156329	0.309336	6.04834e-05	0.000538276	0.161975	0.194579	207	k__Bacteria;p__Chloroflexi;c__Chloroflexi;o__AKIW781;f__
2	7.79485e-20	2.55955e-05	0.00723074	0.278617	0.658312	0.414048	0.685415	0.739172	0.119369	563	k__Bacteria;p__[Thermi];c__Deinococci;o__Deinococcales;f__Deinococcaceae
3	6.17323e-13	3.83933e-05		0.836338	0.872827	0.000663868	0.00161114	0.0711983	0.512339	265	k__Bacteria;p__FBP;c__;o__;f__
4	1.22973e-08	5.1191e-05	k	0.00273353	0.0111666	0.382204	0.624894	0.0676115	0.0733882	316	k__Bacteria;p__Gemmatimonadetes;c__Gemmatimonadetes;__;__
5	1.32566e-08	6.39888e-05	565	0.574975	0.626851	0.541782	0.807287	0.352275	0.0369677	257	k__Bacteria;p__Cyanobacteria;c__Oscillatoriophycideae;o__Oscillatoriales;f__Phormidiaceae
6	1.72517e-08	7.67866e-05		0.0633221	0.987529	0.0277028	0.0692942	0.228816	0.196953	313	k__Bacteria;p__Gemmatimonadetes;c__Gemm-3;o__;f__
7	2.17439e-08	8.95843e-05		0.138132	0.442154	0.0835829	0.224091	0.9489	0.00413202	254	k__Bacteria;p__Cyanobacteria;c__Nostocophycideae;o__Nostocales;f__Nostocaceae
8	2.84364e-08	0.000102382		0.112765	6.82966e-08	0.241363	0.0258519	0.820469	0.678702	314	k__Bacteria;p__Gemmatimonadetes;c__Gemm-4;o__;f__
9	3.4239e-07	0.00011518		0.190319	0.832181	1.16825e-12	3.19497e-12	1.37563e-05	0.533063	396	k__Bacteria;p__Proteobacteria;c__Alphaproteobacteria;o__Rhizobiales;f__Rhodobiaceae
10	4.51062e-07	0.000127978		0.328377	0.36729	2.76371e-07	8.46869e-09	0.000355986	0.172854	97	k__Bacteria;p__Actinobacteria;c__Actinobacteria;o__Actinomycetales;f__Sporichthyaceae
11	1.28349e-06	0.000140775		0.0429612	3.06864e-07	0.105277	0.00271545	0.773486	0.523141	507	k__Bacteria;p__Proteobacteria;c__Gammaproteobacteria;o__[Marinicellales];f__[Marinicellaceae]
12	1.30071e-06	0.000153573		0.300864	1.34827e-06	0.923884	0.864675	0.0598316	0.525552	55	k__Bacteria;p__Actinobacteria;c__Acidimicrobiia;o__Acidimicrobiales;f__
13	2.50456e-06	0.000166371		0.35722	0.737139	0.989523	0.772165	0.383314	0.242998	433	k__Bacteria;p__Proteobacteria;c__Betaproteobacteria;o__SC-I-84;f__
14	3.00372e-06	0.000179169		0.0188216	0.236043	0.145585	0.794033	0.368378	0.118049	111	k__Bacteria;p__Actinobacteria;c__Rubrobacteria;o__Rubrobacterales;f__Rubrobacteraceae
15	6.358e-06	0.000191966		0.0182092	0.689298	0.00414343	0.001866	0.0539737	0.469086	389	k__Bacteria;p__Proteobacteria;c__Alphaproteobacteria;o__Rhizobiales;f__Bradyrhizobiaceae
16	8.34431e-06	0.000204764		0.637125	0.561238	0.142487	0.456288	0.859512	0.144108	246	k__Bacteria;p__Cyanobacteria;c__;o__;f__
17	1.46478e-05	0.000217562		0.447891	1.16599e-06	0.674645	0.494161	0.0993239	0.995141	315	k__Bacteria;p__Gemmatimonadetes;c__Gemm-5;o__;f__
18	1.86818e-05	0.00023036		0.205849	0.467792	0.987047	0.342542	0.896965	0.126741	32	k__Bacteria;p__Acidobacteria;c__BPC102;o__MVS-40;f__
19	2.05968e-05	0.000243157		0.0385582	0.199591	0.127772	0.0366447	0.166549	0.236074	320	k__Bacteria;p__Gemmatimonadetes;c__Gemmatimonadetes;o__Gemmatimonadales;f__
20	2.22913e-05	0.000255955		0.628678	0.586837	0.143555	0.436238	0.882419	0.155837	255	k__Bacteria;p__Cyanobacteria;c__Nostocophycideae;o__Nostocales;f__Scytonemataceae
21	2.22913e-05	0.000268753		0.628678	0.586837	0.143555	0.436238	0.882419	0.155837	427	k__Bacteria;p__Proteobacteria;c__Betaproteobacteria;o__Methylophilales;f__
22	2.47418e-05	0.000281551		0.400009	1.70471e-06	0.0571468	0.0424424	0.61486	0.720367	377	k__Bacteria;p__Proteobacteria;c__Alphaproteobacteria;__;__
23	2.72805e-05	0.000294349		0.126845	4.01441e-06	0.212161	0.0636781	0.933561	0.393508	386	k__Bacteria;p__Proteobacteria;c__Alphaproteobacteria;o__Rhizobiales;f__
24	4.71269e-05	0.000307146		0.340744	0.824549	0.0944083	0.0289162	0.0620522	0.241367	39	k__Bacteria;p__Acidobacteria;c__Solibacteres;o__Solibacterales;f__
25	5.49464e-05	0.000319944		0.87536	0.949959	0.440816	0.10036	0.56634	0.38243	338	k__Bacteria;p__OP11;c__;o__;f__
26	5.88103e-05	0.000332742		0.351875	0.703797	0.0534538	0.0870248	0.203876	0.660927	388	k__Bacteria;p__Proteobacteria;c__Alphaproteobacteria;o__Rhizobiales;f__Beijerinckiaceae
27	6.57055e-05	0.00034554		0.793373	0.842119	5.61158e-07	2.03046e-05	0.00873237	0.2662	370	k__Bacteria;p__Planctomycetes;c__Planctomycetia;o__Gemmatales;f__Isosphaeraceae
28	7.1929e-05	0.000358337		0.693876	5.86825e-05	0.431884	0.534002	0.38111	0.308979	41	k__Bacteria;p__Acidobacteria;c__Solibacteres;o__Solibacterales;f__PAUC26f
29	8.64791e-05	0.000371135		0.639987	2.36587e-05	0.392909	0.363688	0.451205	0.142482	192	k__Bacteria;p__Chloroflexi;c__Anaerolineae;o__DRC31;f__
30	8.69711e-05	0.000383933		0.118227	0.00883717	0.104746	0.431631	0.568122	0.269467	45	k__Bacteria;p__Acidobacteria;c__Sva0725;o__Sva0725;f__
31	9.52668e-05	0.000396731		1.69241e-07	0.377698	0.0382577	0.00587356	0.232059	0.52296	237	k__Bacteria;p__Chloroflexi;c__Thermomicrobia;o__;f__
32	0.000109762	0.000409528		0.0378346	1.4733e-05	0.718198	0.380959	0.295499	0.377837	432	k__Bacteria;p__Proteobacteria;c__Betaproteobacteria;o__Rhodocyclales;f__Rhodocyclaceae
33	0.000113345	0.000422326		0.948089	1.05826e-05	0.253769	0.172667	0.439484	0.020707	486	k__Bacteria;p__Proteobacteria;c__Gammaproteobacteria;o__HTCC2188;f__HTCC2089
34	0.000124875	0.000435124		0.00020267	0.844309	0.00177737	0.000321659	0.00131325	0.0386903	362	k__Bacteria;p__Planctomycetes;c__Phycisphaerae;o__WD2101;f__
35	0.00013347	0.000447922		0.02069	0.00132224	0.258943	0.139186	0.137425	0.638676	162	k__Bacteria;p__Bacteroidetes;c__[Rhodothermi];o__[Rhodothermales];f__Rhodothermaceae
36	0.000140738	0.000460719		0.102616	1.76958e-05	0.43373	0.0330999	0.931188	0.653064	423	k__Bacteria;p__Proteobacteria;c__Betaproteobacteria;o__Hydrogenophilales;f__Hydrogenophilaceae
37	0.00014781	0.000473517		0.0452171	1.60515e-05	0.26329	0.0127221	0.841709	0.507526	455	k__Bacteria;p__Proteobacteria;c__Deltaproteobacteria;o__Myxococcales;f__Nannocystaceae
38	0.000149327	0.000486315		0.26724	0.135338	0.897792	0.155909	0.255526	0.93721	422	k__Bacteria;p__Proteobacteria;c__Betaproteobacteria;o__Ellin6067;f__
39	0.000197439	0.000499113		0.939296	1.75872e-07	0.00103603	0.15429	0.00174199	0.000817802	86	k__Bacteria;p__Actinobacteria;c__Actinobacteria;o__Actinomycetales;f__Micrococcaceae
40	0.000256602	0.00051191		0.0362775	3.3034e-05	0.205672	0.00427573	0.582847	0.230948	511	k__Bacteria;p__SBR1093;c__VHS-B5-50;o__;f__
41	0.000304513	0.000524708		0.843552	5.89169e-05	0.279381	0.620824	0.556434	0.253895	312	k__Bacteria;p__Gemmatimonadetes;c__Gemm-2;o__;f__
42	0.000359753	0.000537506		0.562074	0.00447478	0.592567	0.847027	0.959613	0.000293426	275	k__Bacteria;p__Firmicutes;c__Bacilli;o__Bacillales;f__Planococcaceae
43	0.000370325	0.000550304		0.565294	0.419302	0.311344	0.654681	0.557033	0.787102	347	k__Bacteria;p__Planctomycetes;c__BD7-11;o__;f__
44	0.000413534	0.000563102		0.745527	0.571759	0.544018	0.0511074	0.555235	0.471214	194	k__Bacteria;p__Chloroflexi;c__Anaerolineae;o__H39;f__
45	0.000511221	0.000575899		2.77172e-05	0.593408	0.520116	0.0650306	0.611757	0.188533	88	k__Bacteria;p__Actinobacteria;c__Actinobacteria;o__Actinomycetales;f__Mycobacteriaceae
46	0.000544418	0.000588697		0.337178	2.75222e-06	0.906451	0.528049	0.399197	0.671473	310	k__Bacteria;p__Gemmatimonadetes;c__;o__;f__
47	0.000551319	0.000601495		0.818227	0.638501	0.0011519	0.00349599	0.0503213	0.962001	183	k__Bacteria;p__Chloroflexi;c__;o__;f__
48	0.000586424	0.000614293		0.00153476	0.0497391	0.336699	0.741832	0.387938	0.117039	403	k__Bacteria;p__Proteobacteria;c__Alphaproteobacteria;o__Rhodospirillales;f__Rhodospirillaceae
49	0.000636225	0.00062709		0.00275846	0.805738	0.0696488	0.0392548	0.0351841	0.28451	25	k__Bacteria;p__Acidobacteria;c__Acidobacteria-6;o__iii1-15;f__
50	0.000665867	0.000639888		0.155583	2.067e-05	0.317356	0.0219843	0.844608	0.423133	444	k__Bacteria;p__Proteobacteria;c__Deltaproteobacteria;o__Desulfuromonadales;f__Pelobacteraceae
51	0.000684603	0.000652686		0.378759	0.356655	0.060114	0.261889	0.426871	0.176602	516	k__Bacteria;p__TM6;c__SBRH58;o__;f__
52	0.000689505	0.000665484		0.214953	0.447368	0.00122663	0.0135466	0.0668814	0.534571	231	k__Bacteria;p__Chloroflexi;c__TK10;o__B07_WMSP1;__
53	0.000948671	0.000678281		0.0565769	0.169234	4.17925e-08	1.1163e-09	2.45421e-05	0.317615	80	k__Bacteria;p__Actinobacteria;c__Actinobacteria;o__Actinomycetales;f__Geodermatophilaceae
54	0.00113623	0.000691079		0.466076	0.000567635	0.0810511	0.0294859	0.898379	0.955254	503	k__Bacteria;p__Proteobacteria;c__Gammaproteobacteria;o__Thiotrichales;f__Piscirickettsiaceae
55	0.00115482	0.000703877		0.043639	5.52983e-05	0.394814	0.00858772	0.622302	0.856895	541	k__Bacteria;p__Verrucomicrobia;c__Verruco-5;o__LD1-PB3;f__LD1-PA34
56	0.00121623	0.000716675		0.757562	0.554631	0.290954	0.712474	0.867033	0.247297	242	k__Bacteria;p__Cyanobacteria;__;__;__
57	0.00121904	0.000729472		0.773021	0.572845	0.0762648	0.0146462	0.201993	0.907038	402	k__Bacteria;p__Proteobacteria;c__Alphaproteobacteria;o__Rhodospirillales;f__Acetobacteraceae
58	0.00124359	0.00074227		0.152273	0.00132339	0.0154423	0.0521227	0.254411	0.198312	276	k__Bacteria;p__Firmicutes;c__Bacilli;o__Bacillales;f__Staphylococcaceae
59	0.00136996	0.000755068		0.0256008	0.1727	0.121751	0.0182087	0.0251851	0.51404	369	k__Bacteria;p__Planctomycetes;c__Planctomycetia;o__Gemmatales;f__Gemmataceae
60	0.00138308	0.000767866		0.322499	0.011362	0.946072	0.717345	0.172441	0.844421	20	k__Bacteria;p__Acidobacteria;c__Acidobacteria-5;o__;f__
61	0.00147527	0.000780663		0.203281	0.470039	0.0401563	0.125216	0.366541	0.643877	221	k__Bacteria;p__Chloroflexi;c__Ktedonobacteria;o__TK10;f__
62	0.00180715	0.000793461		0.0303286	0.127602	0.103104	0.457649	0.00651576	0.47365	401	k__Bacteria;p__Proteobacteria;c__Alphaproteobacteria;o__Rhodospirillales;f__
63	0.00180766	0.000806259		0.816579	0.593205	0.144094	0.153919	0.368503	0.150771	195	k__Bacteria;p__Chloroflexi;c__Anaerolineae;o__S0208;f__
64	0.00188457	0.000819057		0.200647	0.0513169	0.161611	0.0830928	0.1016	0.255122	73	k__Bacteria;p__Actinobacteria;c__Actinobacteria;o__Actinomycetales;f__Cellulomonadaceae
65	0.0020461	0.000831855		0.636019	0.952162	0.27995	0.26049	0.0686211	0.780794	69	k__Bacteria;p__Actinobacteria;c__Actinobacteria;o__Actinomycetales;f__Actinomycetaceae
66	0.00242037	0.000844652		0.90139	0.0870094	0.443596	0.214313	0.669817	0.568099	219	k__Bacteria;p__Chloroflexi;c__Ktedonobacteria;o__;f__
67	0.00243219	0.00085745		0.470262	0.244067	0.886709	0.0407187	0.134168	0.386085	98	k__Bacteria;p__Actinobacteria;c__Actinobacteria;o__Actinomycetales;f__Streptomycetaceae
68	0.00296669	0.000870248		0.0129582	0.015296	0.999954	0.743014	0.343612	0.675206	546	k__Bacteria;p__Verrucomicrobia;c__[Pedosphaerae];o__[Pedosphaerales];f__
69	0.00314868	0.000883046		0.073128	0.000153713	0.405981	0.0161342	0.67135	0.899364	440	k__Bacteria;p__Proteobacteria;c__Deltaproteobacteria;o__Desulfobacterales;f__Desulfobulbaceae
70	0.00323382	0.000895843		0.300244	0.551618	0.0136594	0.305484	0.32597	0.682973	413	k__Bacteria;p__Proteobacteria;c__Betaproteobacteria;__;__
71	0.00337731	0.000908641		0.00190184	0.522915	0.970058	0.35021	0.096315	0.778574	197	k__Bacteria;p__Chloroflexi;c__Anaerolineae;o__SBR1031;f__A4b
72	0.00342256	0.000921439		0.130044	0.173938	0.209522	0.166293	0.061191	0.787652	285	k__Bacteria;p__Firmicutes;c__Bacilli;o__Lactobacillales;f__Streptococcaceae
73	0.00342587	0.000934237		0.168689	0.666977	0.423825	0.821264	0.40813	0.935161	7	k__Archaea;p__Euryarchaeota;c__Methanobacteria;o__Methanobacteriales;f__Methanobacteriaceae
74	0.0034568	0.000947034		0.727651	0.306225	0.700336	0.580307	0.908675	0.569528	260	k__Bacteria;p__Elusimicrobia;c__Elusimicrobia;__;__
75	0.0034568	0.000959832		0.727651	0.306225	0.700336	0.580307	0.908675	0.569528	248	k__Bacteria;p__Cyanobacteria;c__Chloroplast;o__;f__
76	0.0034568	0.00097263		0.727651	0.306225	0.700336	0.580307	0.908675	0.569528	30	k__Bacteria;p__Acidobacteria;c__BPC102;o__;f__
77	0.00362844	0.000985428		0.962586	0.192398	0.806469	0.780836	0.802712	0.767814	458	k__Bacteria;p__Proteobacteria;c__Deltaproteobacteria;o__NB1-j;f__
78	0.00362844	0.000998225		0.962586	0.192398	0.806469	0.780836	0.802712	0.767814	562	k__Bacteria;p__ZB3;c__;o__;f__
79	0.00371296	0.00101102		0.0163549	0.90811	0.91871	0.93998	0.821411	0.908586	169	k__Bacteria;p__Chlamydiae;c__Chlamydiia;o__Chlamydiales;__
80	0.00390667	0.00102382		0.032646	0.569503	7.24381e-06	0.000254267	0.0131644	0.847099	215	k__Bacteria;p__Chloroflexi;c__Chloroflexi;o__[Roseiflexales];f__
81	0.00398899	0.00103662		0.859135	0.00785523	0.759834	0.684082	0.275105	0.435158	460	k__Bacteria;p__Proteobacteria;c__Deltaproteobacteria;o__NB1-j;f__NB1-i
82	0.00467208	0.00104942		0.00101854	0.381331	0.280781	0.0981388	0.0637569	0.051127	27	k__Bacteria;p__Acidobacteria;c__Acidobacteria-6;o__iii1-15;f__mb2424
83	0.00498225	0.00106221		0.000124266	7.71101e-06	0.0295687	0.00030877	0.895738	0.0135007	372	k__Bacteria;p__Planctomycetes;c__Planctomycetia;o__Planctomycetales;f__Planctomycetaceae
84	0.00512812	0.00107501		0.419213	0.34198	0.42407	0.377545	0.0621296	0.593479	274	k__Bacteria;p__Firmicutes;c__Bacilli;o__Bacillales;f__Paenibacillaceae
85	0.00531136	0.00108781		0.0396974	0.000120331	0.374789	0.00891218	0.66016	0.858135	468	k__Bacteria;p__Proteobacteria;c__Gammaproteobacteria;o__;f__
86	0.00546092	0.00110061		0.00261011	0.0739625	0.71801	0.630226	0.429313	0.0263588	464	k__Bacteria;p__Proteobacteria;c__Deltaproteobacteria;o__[Entotheonellales];f__[Entotheonellaceae]
87	0.00565166	0.00111341		0.0208485	0.0366905	0.8902	0.739558	0.810635	0.0238957	160	k__Bacteria;p__Bacteroidetes;c__Sphingobacteriia;o__Sphingobacteriales;f__Sphingobacteriaceae
88	0.00567325	0.0011262		0.000639937	0.0154845	0.000889051	0.0294815	2.69983e-05	0.00174101	83	k__Bacteria;p__Actinobacteria;c__Actinobacteria;o__Actinomycetales;f__Intrasporangiaceae
89	0.00568459	0.001139		0.00102891	0.710307	0.310274	0.435511	0.0377461	0.21491	91	k__Bacteria;p__Actinobacteria;c__Actinobacteria;o__Actinomycetales;f__Nocardioidaceae
90	0.00607929	0.0011518		0.983883	0.218256	0.025085	0.116243	0.0531474	0.0279422	236	k__Bacteria;p__Chloroflexi;c__Thermomicrobia;__;__
91	0.00694574	0.0011646		0.0548652	0.708775	0.264631	0.520438	0.570434	0.228838	333	k__Bacteria;p__Nitrospirae;c__Nitrospira;o__Nitrospirales;f__Nitrospiraceae
92	0.0074361	0.00117739		0.90653	0.434719	1.1717e-09	2.67142e-08	3.42003e-07	0.0910938	87	k__Bacteria;p__Actinobacteria;c__Actinobacteria;o__Actinomycetales;f__Micromonosporaceae
93	0.00746828	0.00119019		0.0771512	0.00149022	0.420919	0.0225718	0.656422	0.788305	329	k__Bacteria;p__NKB19;c__;o__;f__
94	0.00751518	0.00120299		0.709188	0.612725	0.0134194	0.00984211	0.0668343	0.328842	208	k__Bacteria;p__Chloroflexi;c__Chloroflexi;o__Chloroflexales;__
95	0.00808502	0.00121579		0.0567514	0.333345	0.000173542	0.000607814	0.0021894	0.925534	84	k__Bacteria;p__Actinobacteria;c__Actinobacteria;o__Actinomycetales;f__Kineosporiaceae
96	0.00841769	0.00122859		0.686945	0.448595	0.0326947	0.0938863	0.153238	0.461907	205	k__Bacteria;p__Chloroflexi;c__C0119;o__;f__
97	0.00906337	0.00124138		0.931911	0.0518835	0.0488274	0.0249047	0.259918	0.257819	280	k__Bacteria;p__Firmicutes;c__Bacilli;o__Lactobacillales;f__Aerococcaceae
98	0.00913365	0.00125418		0.912345	0.371466	0.0987374	0.00925657	0.281264	0.0124226	394	k__Bacteria;p__Proteobacteria;c__Alphaproteobacteria;o__Rhizobiales;f__Phyllobacteriaceae
99	0.00965362	0.00126698		0.297276	0.00115469	0.808663	0.0397166	0.925417	0.361184	96	k__Bacteria;p__Actinobacteria;c__Actinobacteria;o__Actinomycetales;f__Sanguibacteraceae
100	0.00984866	0.00127978		0.000302449	0.61328	0.0100626	0.00623452	0.00960527	0.335038	50	k__Bacteria;p__Acidobacteria;c__[Chloracidobacteria];o__RB41;f__Ellin6075
101	0.00986644	0.00129257		0.532354	0.962849	0.0314334	0.125331	0.00240246	0.621459	381	k__Bacteria;p__Proteobacteria;c__Alphaproteobacteria;o__Caulobacterales;f__Caulobacteraceae
102	0.0100653	0.00130537		0.517021	0.596886	0.757024	0.731558	0.0137322	0.448883	23	k__Bacteria;p__Acidobacteria;c__Acidobacteria-6;o__CCU21;f__
103	0.0103288	0.00131817		0.628535	0.00233146	0.716797	0.609603	0.207012	0.0591302	109	k__Bacteria;p__Actinobacteria;c__Nitriliruptoria;o__Nitriliruptorales;f__Nitriliruptoraceae
104	0.0103682	0.00133097		0.595096	0.541459	0.439949	0.498434	0.579871	0.853517	326	k__Bacteria;p__MVP-21;c__;o__;f__
105	0.0109789	0.00134376		0.686539	0.948392	0.324188	0.226806	0.0824148	0.497396	430	k__Bacteria;p__Proteobacteria;c__Betaproteobacteria;o__Nitrosomonadales;f__Nitrosomonadaceae
106	0.0114773	0.00135656		0.168466	0.970677	0.916957	0.363648	0.21688	0.103889	104	k__Bacteria;p__Actinobacteria;c__Actinobacteria;o__Micrococcales;f__
107	0.0115725	0.00136936		0.149412	0.0119368	0.102319	0.0547353	0.234618	0.227447	180	k__Bacteria;p__Chlorobi;c__OPB56;o__;f__
108	0.0122971	0.00138216		0.234958	0.00178217	0.0523375	0.0353874	0.160063	0.0302647	481	k__Bacteria;p__Proteobacteria;c__Gammaproteobacteria;o__Chromatiales;f__Chromatiaceae
109	0.0123223	0.00139496		0.835393	0.965557	0.455965	0.91769	0.0566566	0.0902704	391	k__Bacteria;p__Proteobacteria;c__Alphaproteobacteria;o__Rhizobiales;f__Hyphomicrobiaceae
110	0.0124555	0.00140775		0.264692	0.335139	0.456511	0.938391	0.449009	0.575795	437	k__Bacteria;p__Proteobacteria;c__Deltaproteobacteria;o__Bdellovibrionales;f__Bacteriovoracaceae
111	0.0124861	0.00142055		0.393082	0.333969	0.0099082	0.0660422	0.338082	0.757085	225	k__Bacteria;p__Chloroflexi;c__SHA-26;o__;f__
112	0.0126888	0.00143335		0.538193	0.790877	7.05576e-05	4.70758e-05	0.334911	0.359914	122	k__Bacteria;p__Armatimonadetes;c__Armatimonadia;o__Armatimonadales;f__Armatimonadaceae
113	0.0137409	0.00144615		0.597253	4.64052e-05	0.214431	0.062544	0.929425	0.740819	398	k__Bacteria;p__Proteobacteria;c__Alphaproteobacteria;o__Rhodobacterales;f__Hyphomonadaceae
114	0.0137943	0.00145894		0.500504	0.00422008	0.501212	0.898967	0.342086	0.619318	364	k__Bacteria;p__Planctomycetes;c__Pla3;o__;f__
115	0.0140056	0.00147174		0.706732	0.266109	0.843879	0.994735	0.521241	0.432849	451	k__Bacteria;p__Proteobacteria;c__Deltaproteobacteria;o__Myxococcales;f__Cystobacteraceae
116	0.0142493	0.00148454		0.466755	0.000977194	0.0469753	0.0601309	0.135801	0.0552534	74	k__Bacteria;p__Actinobacteria;c__Actinobacteria;o__Actinomycetales;f__Corynebacteriaceae
117	0.0142707	0.00149734		1.13753e-05	0.556263	0.883932	0.820724	0.479911	0.00345507	15	k__Bacteria;__;__;__;__
118	0.014809	0.00151014		0.131455	0.107308	0.605336	0.0989819	0.821149	0.00492318	294	k__Bacteria;p__Firmicutes;c__Clostridia;o__Clostridiales;f__Gracilibacteraceae
119	0.0151891	0.00152293		0.66371	0.00447019	0.611716	0.798019	0.391819	0.0890547	31	k__Bacteria;p__Acidobacteria;c__BPC102;o__B110;f__
120	0.0154871	0.00153573		0.916432	0.268674	0.00672265	0.0502985	0.0363678	0.961562	54	k__Bacteria;p__Actinobacteria;c__Acidimicrobiia;o__Acidimicrobiales;__
121	0.0155459	0.00154853		0.0408063	0.00292319	0.966223	0.612441	0.2264	0.0780912	60	k__Bacteria;p__Actinobacteria;c__Acidimicrobiia;o__Acidimicrobiales;f__Iamiaceae
122	0.0166584	0.00156133		0.0199493	0.018847	0.0113632	0.000747071	0.0190477	0.890126	412	k__Bacteria;p__Proteobacteria;c__Alphaproteobacteria;o__Sphingomonadales;f__Sphingomonadaceae
123	0.0173163	0.00157412		0.416065	0.723184	0.774093	0.83824	0.246943	0.000879367	99	k__Bacteria;p__Actinobacteria;c__Actinobacteria;o__Actinomycetales;f__Streptosporangiaceae
124	0.0178203	0.00158692		0.467229	0.0486852	0.00530013	0.000656412	0.622256	0.0114047	156	k__Bacteria;p__Bacteroidetes;c__Flavobacteriia;o__Flavobacteriales;f__Flavobacteriaceae
125	0.017903	0.00159972		0.97592	0.647007	0.160723	0.11366	0.0738002	0.21998	46	k__Bacteria;p__Acidobacteria;c__[Chloracidobacteria];o__11-24;f__
126	0.0179657	0.00161252		0.0373384	0.116263	0.143171	0.0103102	0.14408	0.236991	52	k__Bacteria;p__Acidobacteria;c__iii1-8;o__DS-18;f__
127	0.0181984	0.00162532		0.07199	1.87639e-05	0.0744467	0.00144855	0.508186	0.242727	540	k__Bacteria;p__Verrucomicrobia;c__Opitutae;o__[Pelagicoccales];f__[Pelagicoccaceae]
128	0.0184561	0.00163811		0.117035	0.435574	0.646706	0.7595	0.0435864	0.983387	93	k__Bacteria;p__Actinobacteria;c__Actinobacteria;o__Actinomycetales;f__Promicromonosporaceae
129	0.0184647	0.00165091		0.297363	0.533377	0.0241609	0.184524	7.82779e-09	0.219908	222	k__Bacteria;p__Chloroflexi;c__P2-11E;o__;f__
130	0.0199248	0.00166371		0.368074	0.009131	0.839425	0.146421	0.241878	0.00858679	499	k__Bacteria;p__Proteobacteria;c__Gammaproteobacteria;o__Pseudomonadales;f__Moraxellaceae
131	0.020039	0.00167651		0.307881	0.864	0.000261912	0.00109908	0.00776949	0.330262	49	k__Bacteria;p__Acidobacteria;c__[Chloracidobacteria];o__RB41;f__
132	0.0216126	0.0016893		0.00402337	0.0849182	0.00405397	0.0389867	0.16157	0.21101	76	k__Bacteria;p__Actinobacteria;c__Actinobacteria;o__Actinomycetales;f__Dermabacteraceae
133	0.0221982	0.0017021		0.547784	0.00752385	0.184742	0.0658835	0.114399	0.178344	224	k__Bacteria;p__Chloroflexi;c__SAR202;o__;f__
134	0.0222228	0.0017149		0.0539244	0.000296971	0.0269094	0.002135	0.530281	0.00284872	26	k__Bacteria;p__Acidobacteria;c__Acidobacteria-6;o__iii1-15;f__RB40
135	0.023544	0.0017277		0.0364468	0.119093	0.600872	0.413158	0.156043	0.660973	78	k__Bacteria;p__Actinobacteria;c__Actinobacteria;o__Actinomycetales;f__Dietziaceae
136	0.0246567	0.0017405		0.0299766	0.768573	0.0176253	0.024099	0.0193495	0.41948	322	k__Bacteria;p__Gemmatimonadetes;c__Gemmatimonadetes;o__Gemmatimonadales;f__Gemmatimonadaceae
137	0.0255782	0.00175329		0.845355	0.00444319	0.249352	0.521675	0.391125	0.33419	497	k__Bacteria;p__Proteobacteria;c__Gammaproteobacteria;o__Oceanospirillales;f__Halomonadaceae
138	0.025609	0.00176609		0.470643	0.809914	0.30062	0.0291011	0.146585	0.940326	420	k__Bacteria;p__Proteobacteria;c__Betaproteobacteria;o__Burkholderiales;f__Comamonadaceae
139	0.0273393	0.00177889		0.435825	0.00189105	0.358055	0.373598	0.585652	0.860406	352	k__Bacteria;p__Planctomycetes;c__OM190;o__agg27;f__
140	0.0274562	0.00179169		0.00630361	0.800845	0.441607	0.940725	0.275605	0.99494	463	k__Bacteria;p__Proteobacteria;c__Deltaproteobacteria;o__Syntrophobacterales;f__Syntrophobacteraceae
141	0.0281968	0.00180448		0.169634	0.83295	0.00101213	0.334608	0.681864	0.0683476	95	k__Bacteria;p__Actinobacteria;c__Actinobacteria;o__Actinomycetales;f__Pseudonocardiaceae
142	0.0299458	0.00181728		0.412379	0.108284	0.252174	0.0494735	0.34729	0.40789	9	k__Archaea;p__Euryarchaeota;c__Methanomicrobia;o__Methanosarcinales;f__Methanosarcinaceae
143	0.0301969	0.00183008		0.658197	0.764496	0.756342	0.96788	0.71195	0.270707	303	k__Bacteria;p__Firmicutes;c__Clostridia;o__OPB54;f__
144	0.0305087	0.00184288		0.974573	0.0569188	0.806983	0.470377	0.580963	0.964063	8	k__Archaea;p__Euryarchaeota;c__Methanomicrobia;o__Methanomicrobiales;f__
145	0.0309854	0.00185568		0.172378	0.994533	0.981401	0.547542	0.465059	0.61398	337	k__Bacteria;p__OD1;c__ZB2;o__;f__
146	0.0310675	0.00186847		0.209655	0.475643	0.702324	0.837901	0.48781	0.506348	479	k__Bacteria;p__Proteobacteria;c__Gammaproteobacteria;o__Chromatiales;__
147	0.0311325	0.00188127		0.0857471	0.2887	0.107144	0.0497808	0.000161575	0.892679	483	k__Bacteria;p__Proteobacteria;c__Gammaproteobacteria;o__Enterobacteriales;f__Enterobacteriaceae
148	0.0316714	0.00189407		0.196775	0.0996273	0.13854	0.029373	0.699044	0.296388	466	k__Bacteria;p__Proteobacteria;c__Gammaproteobacteria;__;__
149	0.0318601	0.00190687		0.00326442	0.052258	0.374275	0.874774	0.33947	0.888949	292	k__Bacteria;p__Firmicutes;c__Clostridia;o__Clostridiales;f__Clostridiaceae
150	0.0320838	0.00191966		0.797211	0.418141	0.70419	0.590342	0.447853	0.725167	101	k__Bacteria;p__Actinobacteria;c__Actinobacteria;o__Actinomycetales;f__Williamsiaceae
151	0.0331674	0.00193246		0.00349062	0.0320131	0.191546	0.0037916	0.379581	0.0520285	472	k__Bacteria;p__Proteobacteria;c__Gammaproteobacteria;o__Alteromonadales;f__211ds20
152	0.0363863	0.00194526		0.954937	0.491936	0.754725	0.764764	0.721038	0.694061	175	k__Bacteria;p__Chlorobi;__;__;__
153	0.0375946	0.00195806		0.640147	0.539873	0.372889	0.140522	0.204761	0.782709	520	k__Bacteria;p__TM7;c__SC3;o__;f__
154	0.0376862	0.00197086		0.144248	0.00329288	0.514275	0.0658158	0.759834	0.659496	534	k__Bacteria;p__Verrucomicrobia;c__Opitutae;__;__
155	0.0381366	0.00198365		0.188938	0.975336	0.33208	0.397213	0.11412	0.77272	67	k__Bacteria;p__Actinobacteria;c__Actinobacteria;o__Actinomycetales;__
156	0.0381749	0.00199645		0.0164544	0.627423	0.0615361	0.0596407	0.0105412	0.0377315	191	k__Bacteria;p__Chloroflexi;c__Anaerolineae;o__Caldilineales;f__Caldilineaceae
157	0.0392503	0.00200925		0.881852	0.00380473	0.201291	0.498954	0.52749	0.566935	477	k__Bacteria;p__Proteobacteria;c__Gammaproteobacteria;o__Alteromonadales;f__OM60
158	0.0396336	0.00202205		0.670032	0.436923	0.970094	0.936226	0.946554	0.483624	552	k__Bacteria;p__Verrucomicrobia;c__[Spartobacteria];o__[Chthoniobacterales];__
159	0.0399956	0.00203484		0.498984	0.403485	0.899707	0.735098	0.831616	0.766793	504	k__Bacteria;p__Proteobacteria;c__Gammaproteobacteria;o__Xanthomonadales;__
160	0.0399956	0.00204764		0.498984	0.403485	0.899707	0.735098	0.831616	0.766793	527	k__Bacteria;p__Tenericutes;c__Mollicutes;o__;f__
161	0.0413066	0.00206044		0.561401	0.477755	0.69868	0.470149	0.39815	0.547422	266	k__Bacteria;p__Fibrobacteres;c__Fibrobacteria;o__258ds10;f__
162	0.0418304	0.00207324		0.828746	0.00463428	0.673397	0.480739	0.622793	0.0148589	278	k__Bacteria;p__Firmicutes;c__Bacilli;o__Bacillales;f__[Exiguobacteraceae]
163	0.0419356	0.00208604		0.679342	0.230089	1.13537e-05	0.000114525	0.0198493	0.13097	228	k__Bacteria;p__Chloroflexi;c__TK10;o__AKYG885;f__
164	0.0425068	0.00209883		0.542891	0.748425	0.787839	0.466376	0.00432039	0.665351	100	k__Bacteria;p__Actinobacteria;c__Actinobacteria;o__Actinomycetales;f__Thermomonosporaceae
165	0.0427514	0.00211163		0.86734	0.749705	0.282976	0.0341876	0.000567209	0.75161	81	k__Bacteria;p__Actinobacteria;c__Actinobacteria;o__Actinomycetales;f__Glycomycetaceae
166	0.0449593	0.00212443		0.546239	0.175398	0.258412	0.245519	0.468843	0.976815	490	k__Bacteria;p__Proteobacteria;c__Gammaproteobacteria;o__Legionellales;f__Legionellaceae
167	0.0455538	0.00213723		0.996452	0.649178	0.976771	0.74502	0.792343	0.826843	340	k__Bacteria;p__OP11;c__WCHB1-64;o__d153;f__
168	0.0455538	0.00215002		0.996452	0.649178	0.976771	0.74502	0.792343	0.826843	404	k__Bacteria;p__Proteobacteria;c__Alphaproteobacteria;o__Rickettsiales;__
169	0.0455538	0.00216282		0.996452	0.649178	0.976771	0.74502	0.792343	0.826843	307	k__Bacteria;p__GN02;c__;o__;f__
170	0.0472246	0.00217562		0.50673	0.942082	0.992143	0.70697	0.180325	0.487095	251	k__Bacteria;p__Cyanobacteria;c__Chloroplast;o__Stramenopiles;f__
171	0.047631	0.00218842		0.125915	0.00222445	0.518624	0.0462055	0.70866	0.891198	439	k__Bacteria;p__Proteobacteria;c__Deltaproteobacteria;o__Desulfobacterales;f__Desulfobacteraceae
172	0.0496451	0.00220121		0.000177635	0.170088	0.469799	0.214438	0.0713056	0.176095	537	k__Bacteria;p__Verrucomicrobia;c__Opitutae;o__Opitutales;f__Opitutaceae
173	0.0498093	0.00221401		0.655789	0.0706562	0.346492	0.410687	0.176031	0.855457	253	k__Bacteria;p__Cyanobacteria;c__ML635J-21;o__;f__
174	0.051915	0.00222681		0.779054	0.464397	0.557192	0.523159	0.717094	0.721228	212	k__Bacteria;p__Chloroflexi;c__Chloroflexi;o__Chloroflexales;f__Oscillochloridaceae
175	0.0536945	0.00223961		0.127532	0.164172	0.0104724	0.704481	0.158545	0.178506	6	k__Archaea;p__Crenarchaeota;c__Thaumarchaeota;o__Nitrososphaerales;f__Nitrososphaeraceae
176	0.0557269	0.00225241		0.118741	0.0110927	0.0659985	0.00297536	0.775755	0.201598	151	k__Bacteria;p__Bacteroidetes;c__Cytophagia;o__Cytophagales;f__Flammeovirgaceae
177	0.0569662	0.0022652		0.460637	0.606735	0.790545	0.777727	0.721475	0.836576	19	k__Bacteria;p__Acidobacteria;c__AT-s54;o__;f__
178	0.0588146	0.002278		0.116019	0.427951	0.00153136	0.000486924	0.0368557	0.0207913	166	k__Bacteria;p__Bacteroidetes;c__[Saprospirae];o__[Saprospirales];f__Chitinophagaceae
179	0.0592491	0.0022908		0.644379	0.00112715	0.0966027	0.0911098	0.19405	0.13232	525	k__Bacteria;p__TM7;c__TM7-3;o__EW055;f__
180	0.0594401	0.0023036		0.0101854	0.947662	0.873487	0.67585	0.574828	0.535874	390	k__Bacteria;p__Proteobacteria;c__Alphaproteobacteria;o__Rhizobiales;f__Brucellaceae
181	0.0616684	0.00231639		0.871407	0.000700538	0.161815	0.0211177	0.615571	0.177515	473	k__Bacteria;p__Proteobacteria;c__Gammaproteobacteria;o__Alteromonadales;f__Alteromonadaceae
182	0.0636159	0.00232919		0.632738	0.540676	0.972191	0.827034	0.901597	0.489991	264	k__Bacteria;p__Elusimicrobia;c__Elusimicrobia;o__MVP-88;f__
183	0.0636745	0.00234199		0.884693	0.495023	0.768309	0.782053	0.0019743	0.533445	22	k__Bacteria;p__Acidobacteria;c__Acidobacteria-6;o__BPC015;f__
184	0.0638068	0.00235479		0.252046	0.0957412	0.233422	0.176757	0.129597	0.280657	158	k__Bacteria;p__Bacteroidetes;c__Sphingobacteriia;o__Sphingobacteriales;f__
185	0.0640392	0.00236759		0.541562	0.523083	0.915014	0.997263	0.904956	0.424638	559	k__Bacteria;p__WS3;c__PRR-12;o__Sediment-1;f__CV106
186	0.0649855	0.00238038		0.54813	0.656828	2.38669e-09	2.1923e-10	9.30917e-06	0.0117409	118	k__Bacteria;p__Actinobacteria;c__Thermoleophilia;o__Solirubrobacterales;f__Conexibacteraceae
187	0.0675774	0.00239318		0.378477	0.135854	0.00190689	0.000996161	0.0884242	0.27476	134	k__Bacteria;p__Bacteroidetes;c__At12OctB3;o__;f__
188	0.0679193	0.00240598		0.0355325	0.000496784	0.203628	0.103192	0.805873	0.627019	358	k__Bacteria;p__Planctomycetes;c__Phycisphaerae;o__Phycisphaerales;f__
189	0.0707658	0.00241878		0.62698	0.736856	0.329621	0.93485	0.914629	0.627523	115	k__Bacteria;p__Actinobacteria;c__Thermoleophilia;o__Gaiellales;f__Gaiellaceae
190	0.0715452	0.00243157		0.024576	0.0317299	0.00396516	0.0282282	0.0482485	0.257675	150	k__Bacteria;p__Bacteroidetes;c__Cytophagia;o__Cytophagales;f__Cytophagaceae
191	0.0716286	0.00244437		0.886285	0.501037	0.771439	0.785007	0.00228025	0.539148	5	k__Archaea;p__Crenarchaeota;c__Thaumarchaeota;o__Cenarchaeales;f__SAGMA-X
192	0.0718054	0.00245717		0.287239	0.463244	0.00127726	0.000208157	0.00606805	0.0374103	121	k__Bacteria;p__Armatimonadetes;c__0319-6E2;o__;f__
193	0.072675	0.00246997		0.258287	0.963967	0.382003	0.701384	0.889804	0.0520478	392	k__Bacteria;p__Proteobacteria;c__Alphaproteobacteria;o__Rhizobiales;f__Methylobacteriaceae
194	0.0743775	0.00248277		0.894426	0.938071	0.597647	0.946004	0.877935	0.766564	165	k__Bacteria;p__Bacteroidetes;c__[Saprospirae];o__[Saprospirales];f__
195	0.074434	0.00249556		0.36065	7.30013e-05	0.0470186	0.0168828	0.562799	0.00239209	474	k__Bacteria;p__Proteobacteria;c__Gammaproteobacteria;o__Alteromonadales;f__HTCC2188
196	0.0747092	0.00250836		0.000359946	0.126124	0.0187365	0.0140371	0.360188	0.0116872	506	k__Bacteria;p__Proteobacteria;c__Gammaproteobacteria;o__Xanthomonadales;f__Xanthomonadaceae
197	0.0748855	0.00252116		0.0437587	0.505009	0.588337	0.235394	0.991458	0.300101	110	k__Bacteria;p__Actinobacteria;c__OPB41;o__;f__
198	0.0752737	0.00253396		0.964367	0.381929	0.259667	0.00351231	0.366197	0.155237	411	k__Bacteria;p__Proteobacteria;c__Alphaproteobacteria;o__Sphingomonadales;f__Erythrobacteraceae
199	0.0758426	0.00254675		0.174347	0.0308331	0.045895	0.00417405	0.818831	0.140826	149	k__Bacteria;p__Bacteroidetes;c__Cytophagia;o__Cytophagales;f__Cyclobacteriaceae
200	0.0801884	0.00255955		0.49675	0.0138426	0.62869	0.586621	0.239196	0.0776527	498	k__Bacteria;p__Proteobacteria;c__Gammaproteobacteria;o__Oceanospirillales;f__Oceanospirillaceae
201	0.0804147	0.00257235		0.360419	0.0928157	0.658154	0.63587	0.36359	0.890262	179	k__Bacteria;p__Chlorobi;c__Ignavibacteria;o__Ignavibacteriales;f__Ignavibacteriaceae
202	0.0806167	0.00258515		0.0148718	0.156895	0.891666	0.364768	0.101839	0.431412	235	k__Bacteria;p__Chloroflexi;c__TK17;o__mle1-48;f__
203	0.0831715	0.00259795		0.933101	0.641559	0.634651	0.257199	0.242947	0.589078	232	k__Bacteria;p__Chloroflexi;c__TK10;o__B07_WMSP1;f__
204	0.0845921	0.00261074		4.23806e-07	0.0173021	0.797231	0.909871	0.620272	0.205998	409	k__Bacteria;p__Proteobacteria;c__Alphaproteobacteria;o__Sphingomonadales;__
205	0.0870733	0.00262354		0.458041	0.613946	1.05176e-05	0.000738268	0.0123665	0.365058	214	k__Bacteria;p__Chloroflexi;c__Chloroflexi;o__[Roseiflexales];__
206	0.0878757	0.00263634		0.00584416	0.972377	0.110769	0.158019	0.226192	0.0771387	367	k__Bacteria;p__Planctomycetes;c__Planctomycetia;o__B97;f__
207	0.0902729	0.00264914		0.879289	0.808085	0.0155646	0.0265652	4.89525e-08	0.756985	12	k__Archaea;p__Euryarchaeota;c__Thermoplasmata;o__E2;f__[Methanomassiliicoccaceae]
208	0.0917209	0.00266193		5.58669e-11	0.370649	0.76776	0.396642	0.767308	0.647443	321	k__Bacteria;p__Gemmatimonadetes;c__Gemmatimonadetes;o__Gemmatimonadales;f__Ellin5301
209	0.0973529	0.00267473		0.210516	0.0801543	0.182501	0.0579198	0.387832	0.64476	287	k__Bacteria;p__Firmicutes;c__Clostridia;__;__
210	0.097715	0.00268753		0.197214	0.0692917	0.614836	0.717171	0.468818	0.324556	258	k__Bacteria;p__Cyanobacteria;c__Synechococcophycideae;o__Pseudanabaenales;f__
211	0.0978497	0.00270033		0.868457	0.144516	0.875269	0.376986	0.00729953	0.56452	311	k__Bacteria;p__Gemmatimonadetes;c__Gemm-1;o__;f__
212	0.100108	0.00271313		0.448819	0.314185	0.0661797	0.947734	0.0816046	0.156227	117	k__Bacteria;p__Actinobacteria;c__Thermoleophilia;o__Solirubrobacterales;f__
213	0.102483	0.00272592		0.77506	0.418895	0.396972	0.974801	0.739029	0.440101	250	k__Bacteria;p__Cyanobacteria;c__Chloroplast;o__Chlorophyta;f__Chlamydomonadaceae
214	0.105657	0.00273872		0.102531	0.0443597	0.175062	0.00565231	0.58842	0.646395	187	k__Bacteria;p__Chloroflexi;c__Anaerolineae;o__Anaerolineales;f__Anaerolinaceae
215	0.111846	0.00275152		0.345204	0.65815	0.474301	0.46519	0.396462	0.609888	48	k__Bacteria;p__Acidobacteria;c__[Chloracidobacteria];o__PK29;f__
216	0.114696	0.00276432		0.0473809	0.480121	0.746457	0.780566	0.418509	0.258966	200	k__Bacteria;p__Chloroflexi;c__Anaerolineae;o__SBR1031;f__oc28
217	0.116597	0.00277711		0.432886	0.0359238	0.995947	0.314858	0.192802	0.0286149	33	k__Bacteria;p__Acidobacteria;c__DA052;o__E29;f__
218	0.118654	0.00278991		0.185834	0.473345	0.920255	0.534028	0.621706	0.991471	336	k__Bacteria;p__OD1;c__SM2F11;o__;f__
219	0.119567	0.00280271		0.00965737	0.139431	0.000742611	0.00473372	0.00289422	0.739172	416	k__Bacteria;p__Proteobacteria;c__Betaproteobacteria;o__Burkholderiales;__
220	0.120818	0.00281551		0.160431	0.0203378	0.894891	0.23599	0.136943	0.0430202	295	k__Bacteria;p__Firmicutes;c__Clostridia;o__Clostridiales;f__Lachnospiraceae
221	0.12345	0.00282831		0.2593	0.255255	0.986931	0.371813	0.152494	0.0220458	291	k__Bacteria;p__Firmicutes;c__Clostridia;o__Clostridiales;f__Christensenellaceae
222	0.125118	0.0028411		0.191193	0.014981	0.979628	0.25487	0.1693	0.0394946	290	k__Bacteria;p__Firmicutes;c__Clostridia;o__Clostridiales;f__
223	0.125468	0.0028539		0.561983	0.926998	1.48299e-06	4.67021e-05	0.0011452	0.284671	47	k__Bacteria;p__Acidobacteria;c__[Chloracidobacteria];o__DS-100;f__
224	0.127045	0.0028667		0.573074	0.520086	0.56982	0.505334	0.00609478	0.306932	549	k__Bacteria;p__Verrucomicrobia;c__[Pedosphaerae];o__[Pedosphaerales];f__OPB35
225	0.129007	0.0028795		0.107783	0.255074	0.12723	0.00249213	0.358802	0.678622	103	k__Bacteria;p__Actinobacteria;c__Actinobacteria;o__Bifidobacteriales;f__
226	0.129108	0.00289229		0.183873	0.75984	0.19017	0.0583939	0.183516	0.510575	17	k__Bacteria;p__Acidobacteria;c__;o__;f__
227	0.129428	0.00290509		0.0163169	0.402241	0.640504	0.0727025	0.21882	0.266193	399	k__Bacteria;p__Proteobacteria;c__Alphaproteobacteria;o__Rhodobacterales;f__Rhodobacteraceae
228	0.12956	0.00291789		0.177358	0.00702142	0.569405	0.0788973	0.741893	0.904033	131	k__Bacteria;p__BRC1;c__NPL-UPA2;o__;f__
229	0.12956	0.00293069		0.177358	0.00702142	0.569405	0.0788973	0.741893	0.904033	139	k__Bacteria;p__Bacteroidetes;c__Bacteroidia;o__Bacteroidales;f__Marinilabiaceae
230	0.12956	0.00294349		0.177358	0.00702142	0.569405	0.0788973	0.741893	0.904033	144	k__Bacteria;p__Bacteroidetes;c__Bacteroidia;o__Bacteroidales;f__SB-1
231	0.12956	0.00295628		0.177358	0.00702142	0.569405	0.0788973	0.741893	0.904033	267	k__Bacteria;p__Fibrobacteres;c__TG3;o__TG3-1;f__TSCOR003-O20
232	0.12956	0.00296908		0.177358	0.00702142	0.569405	0.0788973	0.741893	0.904033	357	k__Bacteria;p__Planctomycetes;c__Phycisphaerae;o__Phycisphaerales;__
233	0.12956	0.00298188		0.177358	0.00702142	0.569405	0.0788973	0.741893	0.904033	174	k__Bacteria;p__Chlamydiae;c__Chlamydiia;o__Chlamydiales;f__Waddliaceae
234	0.12956	0.00299468		0.177358	0.00702142	0.569405	0.0788973	0.741893	0.904033	442	k__Bacteria;p__Proteobacteria;c__Deltaproteobacteria;o__Desulfovibrionales;f__Desulfovibrionaceae
235	0.12956	0.00300747		0.177358	0.00702142	0.569405	0.0788973	0.741893	0.904033	510	k__Bacteria;p__SBR1093;c__;o__;f__
236	0.131173	0.00302027		0.680896	0.211989	0.954796	0.485164	0.526072	0.745704	508	k__Bacteria;p__Proteobacteria;c__TA18;o__CV90;f__
237	0.137663	0.00303307		0.979414	0.807139	0.00135897	0.00352698	1.9299e-13	0.889642	424	k__Bacteria;p__Proteobacteria;c__Betaproteobacteria;o__IS-44;f__
238	0.143578	0.00304587		1.33532e-06	0.298636	0.0296038	0.0128245	0.243694	0.391771	79	k__Bacteria;p__Actinobacteria;c__Actinobacteria;o__Actinomycetales;f__Frankiaceae
239	0.144407	0.00305867		0.0928425	0.131186	0.675288	0.681816	0.32586	0.311302	82	k__Bacteria;p__Actinobacteria;c__Actinobacteria;o__Actinomycetales;f__Gordoniaceae
240	0.146215	0.00307146		0.963025	0.770475	1.17116e-06	4.31362e-06	1.17268e-21	0.98237	327	k__Bacteria;p__NC10;c__12-24;o__MIZ17;f__
241	0.149355	0.00308426		0.996641	0.890996	0.00219592	0.00387989	0.0681834	0.661906	148	k__Bacteria;p__Bacteroidetes;c__Cytophagia;o__Cytophagales;f__
242	0.152511	0.00309706		0.0875415	0.363458	0.00228595	0.00156343	0.00650062	0.478975	108	k__Bacteria;p__Actinobacteria;c__Nitriliruptoria;o__Euzebyales;f__Euzebyaceae
243	0.154663	0.00310986		0.471747	0.373731	0.0950331	0.00373775	0.463606	0.287821	375	k__Bacteria;p__Proteobacteria;__;__;__
244	0.156852	0.00312265		0.453693	0.0078301	0.232494	0.694159	0.539679	0.368887	469	k__Bacteria;p__Proteobacteria;c__Gammaproteobacteria;o__Aeromonadales;f__Aeromonadaceae
245	0.157855	0.00313545		0.27403	0.325956	0.00081964	0.0150809	4.06212e-05	0.0407449	560	k__Bacteria;p__WS3;c__PRR-12;o__Sediment-1;f__PRR-10
246	0.159077	0.00314825		0.000237992	0.154648	0.703654	0.668059	0.631331	0.597606	126	k__Bacteria;p__Armatimonadetes;c__SHA-37;o__;f__
247	0.160035	0.00316105		0.00541762	1.09911e-05	0.0901106	0.00186539	0.860544	0.0185791	58	k__Bacteria;p__Actinobacteria;c__Acidimicrobiia;o__Acidimicrobiales;f__C111
248	0.165747	0.00317384		0.192749	0.0131788	0.935787	0.305187	0.16586	0.0458202	298	k__Bacteria;p__Firmicutes;c__Clostridia;o__Clostridiales;f__Ruminococcaceae
249	0.166078	0.00318664		0.24861	0.0125719	0.616007	0.475517	0.257837	0.0756139	141	k__Bacteria;p__Bacteroidetes;c__Bacteroidia;o__Bacteroidales;f__Prevotellaceae
250	0.170304	0.00319944		0.865506	0.0113811	0.0275193	0.0217086	0.174832	0.00790113	163	k__Bacteria;p__Bacteroidetes;c__[Rhodothermi];o__[Rhodothermales];f__[Balneolaceae]
251	0.172793	0.00321224		0.020797	0.336467	0.128434	0.426215	0.449585	0.178181	90	k__Bacteria;p__Actinobacteria;c__Actinobacteria;o__Actinomycetales;f__Nocardiaceae
252	0.173676	0.00322504		0.056594	0.88066	0.771034	0.424178	0.853373	0.666134	299	k__Bacteria;p__Firmicutes;c__Clostridia;o__Clostridiales;f__Symbiobacteriaceae
253	0.176085	0.00323783		0.311037	0.760963	0.559728	0.704397	0.427472	0.12012	217	k__Bacteria;p__Chloroflexi;c__Ellin6529;o__;f__
254	0.182092	0.00325063		0.782963	0.0866878	0.00602038	0.00461977	0.359531	0.00317579	410	k__Bacteria;p__Proteobacteria;c__Alphaproteobacteria;o__Sphingomonadales;f__
255	0.183281	0.00326343		0.709579	0.297072	0.273306	0.193851	0.589366	0.956863	387	k__Bacteria;p__Proteobacteria;c__Alphaproteobacteria;o__Rhizobiales;f__Aurantimonadaceae
256	0.183612	0.00327623		0.411259	0.468851	0.52456	0.800204	0.0680038	0.901841	425	k__Bacteria;p__Proteobacteria;c__Betaproteobacteria;o__MND1;f__
257	0.18528	0.00328902		0.449163	0.259378	0.107047	0.0464945	0.132975	0.964134	227	k__Bacteria;p__Chloroflexi;c__TK10;o__;f__
258	0.188634	0.00330182		0.888031	0.560225	0.850863	0.632426	0.0601301	0.738394	11	k__Archaea;p__Euryarchaeota;c__Thermoplasmata;o__E2;f__
259	0.191571	0.00331462		0.844073	0.00229399	0.541943	0.590691	0.753143	0.187059	296	k__Bacteria;p__Firmicutes;c__Clostridia;o__Clostridiales;f__Peptococcaceae
260	0.196862	0.00332742		0.299492	0.132198	0.00255716	3.31132e-06	0.159648	0.752498	378	k__Bacteria;p__Proteobacteria;c__Alphaproteobacteria;o__;f__
261	0.201254	0.00334022		0.304612	0.0240523	0.838112	0.42305	0.271242	0.0566871	146	k__Bacteria;p__Bacteroidetes;c__Bacteroidia;o__Bacteroidales;f__[Paraprevotellaceae]
262	0.217552	0.00335301		0.162535	0.524628	0.0336229	0.0045313	0.412739	0.0116983	152	k__Bacteria;p__Bacteroidetes;c__Cytophagia;o__Cytophagales;f__[Amoebophilaceae]
263	0.221918	0.00336581		0.80063	0.13368	0.868755	0.752576	0.429032	0.348875	400	k__Bacteria;p__Proteobacteria;c__Alphaproteobacteria;o__Rhodospirillales;__
264	0.223379	0.00337861		0.597464	0.617178	0.871192	0.396819	0.262232	0.507234	345	k__Bacteria;p__Planctomycetes;c__028H05-P-BN-P5;o__;f__
265	0.225889	0.00339141		0.337713	0.737565	0.334774	0.719083	0.492094	0.453404	435	k__Bacteria;p__Proteobacteria;c__Deltaproteobacteria;__;__
266	0.228584	0.0034042		0.653538	0.75505	0.0514929	0.00207802	0.273224	0.0999102	564	k__Bacteria;p__[Thermi];c__Deinococci;o__Deinococcales;f__Trueperaceae
267	0.230957	0.003417		0.60126	0.769622	0.833447	0.666499	0.998836	0.334203	201	k__Bacteria;p__Chloroflexi;c__Anaerolineae;o__SJA-15;f__
268	0.238055	0.0034298		0.0266791	0.117701	0.0101087	0.867052	0.0556118	0.0150402	239	k__Bacteria;p__Chloroflexi;c__Thermomicrobia;o__JG30-KF-CM45;f__
269	0.243546	0.0034426		0.597141	0.0330219	0.0866435	0.0277218	0.919333	0.075649	405	k__Bacteria;p__Proteobacteria;c__Alphaproteobacteria;o__Rickettsiales;f__
270	0.243651	0.0034554		0.471006	0.951311	0.421285	0.906564	0.188864	0.00373299	426	k__Bacteria;p__Proteobacteria;c__Betaproteobacteria;o__Methylophilales;__
271	0.245517	0.00346819		0.162512	0.0264152	0.832524	0.30945	0.356087	0.0707116	143	k__Bacteria;p__Bacteroidetes;c__Bacteroidia;o__Bacteroidales;f__S24-7
272	0.247283	0.00348099		0.205349	0.0338456	0.818303	0.194129	0.208854	0.0619342	138	k__Bacteria;p__Bacteroidetes;c__Bacteroidia;o__Bacteroidales;f__Bacteroidaceae
273	0.247338	0.00349379		0.530204	0.39666	0.8521	0.595368	0.673323	0.410761	14	k__Archaea;p__[Parvarchaeota];c__[Parvarchaea];o__YLA114;f__
274	0.248965	0.00350659		0.672187	0.596942	0.888979	0.850435	0.895868	0.879613	171	k__Bacteria;p__Chlamydiae;c__Chlamydiia;o__Chlamydiales;f__Parachlamydiaceae
275	0.249356	0.00351938		0.0370575	0.293941	0.0237267	0.174083	0.0411435	0.448486	558	k__Bacteria;p__WS3;c__PRR-12;o__Sediment-1;f__
276	0.25125	0.00353218		0.447362	0.253268	0.80297	0.765314	0.958853	0.228412	71	k__Bacteria;p__Actinobacteria;c__Actinobacteria;o__Actinomycetales;f__Bogoriellaceae
277	0.2514	0.00354498		0.710817	0.00889963	0.182004	0.174744	0.296879	0.226711	94	k__Bacteria;p__Actinobacteria;c__Actinobacteria;o__Actinomycetales;f__Propionibacteriaceae
278	0.2514	0.00355778		0.710817	0.00889963	0.182004	0.174744	0.296879	0.226711	501	k__Bacteria;p__Proteobacteria;c__Gammaproteobacteria;o__Salinisphaerales;f__Salinisphaeraceae
279	0.251466	0.00357058		0.760854	0.743075	0.901916	0.552803	0.935405	0.453842	561	k__Bacteria;p__WS4;c__;o__;f__
280	0.253088	0.00358337		0.177362	0.871287	0.00171715	0.01151	0.0905346	0.244962	509	k__Bacteria;p__Proteobacteria;c__TA18;o__PHOS-HD29;f__
281	0.253698	0.00359617		8.73203e-11	0.574826	0.562859	0.897555	0.566476	0.950767	43	k__Bacteria;p__Acidobacteria;c__Solibacteres;o__Solibacterales;f__Solibacteraceae
282	0.25647	0.00360897		0.209901	0.354214	0.0740705	0.00257453	0.495522	0.380877	535	k__Bacteria;p__Verrucomicrobia;c__Opitutae;o__;f__
283	0.261489	0.00362177		0.433329	0.112117	0.425405	0.32578	0.924573	0.0620946	159	k__Bacteria;p__Bacteroidetes;c__Sphingobacteriia;o__Sphingobacteriales;f__NS11-12
284	0.261568	0.00363456		0.51748	0.625875	0.879068	0.801949	0.214161	0.214673	63	k__Bacteria;p__Actinobacteria;c__Acidimicrobiia;o__Acidimicrobiales;f__koll13
285	0.267637	0.00364736		0.260493	0.0158968	0.410824	0.816168	0.827571	0.288635	92	k__Bacteria;p__Actinobacteria;c__Actinobacteria;o__Actinomycetales;f__Nocardiopsaceae
286	0.269857	0.00366016		0.0786923	0.898275	0.772477	0.947372	0.794546	0.390834	462	k__Bacteria;p__Proteobacteria;c__Deltaproteobacteria;o__Spirobacillales;f__
287	0.274878	0.00367296		0.0466172	0.485628	0.723461	0.360289	0.272168	0.484596	454	k__Bacteria;p__Proteobacteria;c__Deltaproteobacteria;o__Myxococcales;f__Myxococcaceae
288	0.277533	0.00368576		0.207396	0.593038	0.361915	0.980729	0.686092	0.0579298	238	k__Bacteria;p__Chloroflexi;c__Thermomicrobia;o__AKYG1722;f__
289	0.279189	0.00369855		0.313208	0.0328744	0.167786	0.00657612	0.829721	0.265862	154	k__Bacteria;p__Bacteroidetes;c__Flavobacteriia;o__Flavobacteriales;f__
290	0.279771	0.00371135		0.29888	0.339768	0.654683	0.529189	0.267604	0.54824	301	k__Bacteria;p__Firmicutes;c__Clostridia;o__Clostridiales;f__[Mogibacteriaceae]
291	0.284258	0.00372415		0.00312729	0.513497	0.442675	0.584199	0.785539	0.339661	233	k__Bacteria;p__Chloroflexi;c__TK10;o__B07_WMSP1;f__FFCH4570
292	0.29494	0.00373695		4.88584e-05	0.339263	0.00641659	0.00827892	0.0168319	0.0385839	317	k__Bacteria;p__Gemmatimonadetes;c__Gemmatimonadetes;o__;f__
293	0.295676	0.00374974		3.99983e-12	0.0689453	0.367962	0.685004	0.18105	0.871442	428	k__Bacteria;p__Proteobacteria;c__Betaproteobacteria;o__Methylophilales;f__Methylophilaceae
294	0.298142	0.00376254		0.98931	0.00117615	0.555592	0.597707	0.854246	0.00418854	565	k__Bacteria;p__[Thermi];c__Deinococci;o__Thermales;f__Thermaceae
295	0.303789	0.00377534		0.906646	0.720112	0.367399	0.647976	0.100949	0.836904	421	k__Bacteria;p__Proteobacteria;c__Betaproteobacteria;o__Burkholderiales;f__Oxalobacteraceae
296	0.304147	0.00378814		0.447049	0.165876	0.712933	0.832896	0.718848	0.941664	376	k__Bacteria;p__Proteobacteria;c__;o__;f__
297	0.308786	0.00380094		0.000612911	0.0105961	0.236952	0.173768	0.183372	0.357772	297	k__Bacteria;p__Firmicutes;c__Clostridia;o__Clostridiales;f__Peptostreptococcaceae
298	0.312961	0.00381373		0.291843	0.0039906	0.294756	0.0591437	0.952283	0.225548	155	k__Bacteria;p__Bacteroidetes;c__Flavobacteriia;o__Flavobacteriales;f__Cryomorphaceae
299	0.313988	0.00382653		0.739418	0.411665	0.480098	0.181957	0.531613	0.398005	436	k__Bacteria;p__Proteobacteria;c__Deltaproteobacteria;o__;f__
300	0.314851	0.00383933		0.142573	0.934499	0.954001	0.538135	0.434864	0.841177	29	k__Bacteria;p__Acidobacteria;c__Acidobacteriia;o__Acidobacteriales;f__Koribacteraceae
301	0.318516	0.00385213		0.398198	0.495519	0.411862	0.210291	0.138922	0.55674	452	k__Bacteria;p__Proteobacteria;c__Deltaproteobacteria;o__Myxococcales;f__Cystobacterineae
302	0.324233	0.00386492		0.434864	0.535458	0.766287	0.813381	0.712423	0.308374	374	k__Bacteria;p__Planctomycetes;c__vadinHA49;o__p04_C01;f__
303	0.325896	0.00387772		0.483559	0.718342	0.164314	0.0358922	0.364108	0.0620548	272	k__Bacteria;p__Firmicutes;c__Bacilli;o__Bacillales;f__Alicyclobacillaceae
304	0.327322	0.00389052		0.569372	0.46958	0.000275757	0.000393936	1.29992e-06	0.900304	543	k__Bacteria;p__Verrucomicrobia;c__[Methylacidiphilae];o__S-BQ2-57;f__
305	0.327461	0.00390332		0.388077	0.0990157	0.491981	0.167327	0.116306	0.0385574	261	k__Bacteria;p__Elusimicrobia;c__Elusimicrobia;o__Elusimicrobiales;f__Elusimicrobiaceae
306	0.328178	0.00391612		0.555699	0.510842	0.261211	0.252218	0.141148	0.479555	395	k__Bacteria;p__Proteobacteria;c__Alphaproteobacteria;o__Rhizobiales;f__Rhizobiaceae
307	0.330568	0.00392891		0.665777	0.654297	0.573462	0.736435	0.426706	0.945405	263	k__Bacteria;p__Elusimicrobia;c__Elusimicrobia;o__IIb;f__
308	0.334397	0.00394171		4.15698e-08	8.09689e-05	0.730972	0.643437	0.652073	0.484618	393	k__Bacteria;p__Proteobacteria;c__Alphaproteobacteria;o__Rhizobiales;f__Methylocystaceae
309	0.338305	0.00395451		0.238117	0.178249	0.470265	0.820079	0.999987	0.616166	176	k__Bacteria;p__Chlorobi;c__;o__;f__
310	0.343643	0.00396731		0.655287	0.540765	0.403004	0.508927	0.759235	0.276903	459	k__Bacteria;p__Proteobacteria;c__Deltaproteobacteria;o__NB1-j;f__MND4
311	0.349069	0.0039801		0.0105104	0.30086	0.695421	0.463784	0.203917	0.933258	548	k__Bacteria;p__Verrucomicrobia;c__[Pedosphaerae];o__[Pedosphaerales];f__Ellin517
312	0.35026	0.0039929		0.970398	0.902841	0.000193568	0.00334937	0.00860877	0.694744	42	k__Bacteria;p__Acidobacteria;c__Solibacteres;o__Solibacterales;f__PK34
313	0.350527	0.0040057		0.0148698	0.132372	0.0146562	0.00892299	0.035888	0.403662	419	k__Bacteria;p__Proteobacteria;c__Betaproteobacteria;o__Burkholderiales;f__Burkholderiaceae
314	0.351323	0.0040185		0.000190943	0.00595023	0.175946	0.0994101	0.0197194	0.258435	449	k__Bacteria;p__Proteobacteria;c__Deltaproteobacteria;o__Myxococcales;f__
315	0.358675	0.00403129		0.901731	0.00558237	0.0116412	0.00185986	0.0205396	0.646508	270	k__Bacteria;p__Firmicutes;c__Bacilli;o__Bacillales;__
316	0.366515	0.00404409		0.231323	0.0286932	0.859875	0.405586	0.227827	0.342191	245	k__Bacteria;p__Cyanobacteria;c__4C0d-2;o__YS2;f__
317	0.375491	0.00405689		0.216292	0.071576	0.538407	0.0589984	0.613246	0.924184	198	k__Bacteria;p__Chloroflexi;c__Anaerolineae;o__SBR1031;f__SHA-31
318	0.378423	0.00406969		0.0263945	0.825126	0.332126	0.169433	0.890511	0.945235	407	k__Bacteria;p__Proteobacteria;c__Alphaproteobacteria;o__Rickettsiales;f__Rickettsiaceae
319	0.378514	0.00408249		0.0191178	0.800649	0.00756383	0.00182636	0.0180202	0.480794	114	k__Bacteria;p__Actinobacteria;c__Thermoleophilia;o__Gaiellales;f__AK1AB1_02E
320	0.379229	0.00409528		0.547697	0.0240534	0.224506	0.803406	0.139336	0.484161	120	k__Bacteria;p__Actinobacteria;c__Thermoleophilia;o__Solirubrobacterales;f__Solirubrobacteraceae
321	0.381036	0.00410808		0.841341	0.764299	0.92743	0.661942	0.435756	0.995839	547	k__Bacteria;p__Verrucomicrobia;c__[Pedosphaerae];o__[Pedosphaerales];f__Ellin515
322	0.38524	0.00412088		5.0652e-09	0.968108	0.442802	0.523197	0.817976	0.948109	319	k__Bacteria;p__Gemmatimonadetes;c__Gemmatimonadetes;o__Ellin5290;f__
323	0.392931	0.00413368		0.879794	0.329093	0.762953	0.873258	0.789602	0.549598	363	k__Bacteria;p__Planctomycetes;c__Phycisphaerae;o__mle1-8;f__
324	0.397456	0.00414647		5.97316e-05	0.871829	0.0397403	0.0152155	0.124828	0.785234	447	k__Bacteria;p__Proteobacteria;c__Deltaproteobacteria;o__MIZ46;f__
325	0.398696	0.00415927		0.990588	0.750972	0.7943	0.926168	0.35345	0.451527	542	k__Bacteria;p__Verrucomicrobia;c__Verrucomicrobiae;o__Verrucomicrobiales;f__Verrucomicrobiaceae
326	0.399139	0.00417207		0.00034339	0.122885	0.486278	0.9449	0.466608	0.224849	517	k__Bacteria;p__TM6;c__SJA-4;o__;f__
327	0.401651	0.00418487		0.995527	0.332529	0.0115815	6.24689e-05	0.157599	0.11817	133	k__Bacteria;p__Bacteroidetes;__;__;__
328	0.404073	0.00419767		0.852391	0.358596	0.985244	0.87703	0.889442	0.715344	557	k__Bacteria;p__WS3;c__PRR-12;o__LD1-PA13;f__
329	0.413184	0.00421046		0.361552	0.8466	0.113056	0.894386	0.664101	0.840884	189	k__Bacteria;p__Chloroflexi;c__Anaerolineae;o__CFB-26;f__
330	0.419844	0.00422326		0.0810176	0.183998	0.513762	0.264898	0.726321	0.954346	379	k__Bacteria;p__Proteobacteria;c__Alphaproteobacteria;o__BD7-3;f__
331	0.423471	0.00423606		0.578185	0.559731	0.424397	0.990608	0.761243	0.729714	342	k__Bacteria;p__OP3;c__koll11;o__;f__
332	0.42404	0.00424886		4.94123e-10	0.897855	0.970997	0.911681	0.528854	0.61559	271	k__Bacteria;p__Firmicutes;c__Bacilli;o__Bacillales;f__
333	0.424132	0.00426165		0.0367192	0.0584031	0.0494927	0.182242	0.985347	0.33789	72	k__Bacteria;p__Actinobacteria;c__Actinobacteria;o__Actinomycetales;f__Brevibacteriaceae
334	0.436554	0.00427445		0.779713	0.0635575	0.661131	0.907564	0.672512	0.852319	346	k__Bacteria;p__Planctomycetes;c__;o__;f__
335	0.43997	0.00428725		4.23351e-05	0.0863021	0.797893	0.815335	0.531549	0.817379	286	k__Bacteria;p__Firmicutes;c__Bacilli;o__Turicibacterales;f__Turicibacteraceae
336	0.445307	0.00430005		0.303806	0.0246833	0.0574084	0.075298	0.96273	0.0124214	167	k__Bacteria;p__Bacteroidetes;c__[Saprospirae];o__[Saprospirales];f__Saprospiraceae
337	0.445914	0.00431285		0.0180659	0.831268	0.000488692	8.51611e-06	0.00196772	0.0151743	216	k__Bacteria;p__Chloroflexi;c__Chloroflexi;o__[Roseiflexales];f__[Kouleothrixaceae]
338	0.449967	0.00432564		0.0545049	0.0677676	0.459306	0.103011	0.442899	0.184004	220	k__Bacteria;p__Chloroflexi;c__Ktedonobacteria;o__Ktedonobacterales;f__Ktedonobacteraceae
339	0.450167	0.00433844		0.132246	0.744756	0.647226	0.181856	0.467762	0.731172	448	k__Bacteria;p__Proteobacteria;c__Deltaproteobacteria;o__Myxococcales;__
340	0.450302	0.00435124		0.35382	0.107594	0.971409	0.40189	0.253591	0.0914298	531	k__Bacteria;p__Tenericutes;c__Mollicutes;o__RF39;f__
341	0.450546	0.00436404		0.490557	0.439913	0.0202169	0.0336857	0.0993938	0.0448209	457	k__Bacteria;p__Proteobacteria;c__Deltaproteobacteria;o__Myxococcales;f__Polyangiaceae
342	0.454426	0.00437683		0.537556	0.0514036	0.301219	0.232252	0.155418	0.156747	529	k__Bacteria;p__Tenericutes;c__Mollicutes;o__Anaeroplasmatales;f__Anaeroplasmataceae
343	0.459196	0.00438963		0.348955	0.438499	0.929738	0.604225	0.465946	0.765949	334	k__Bacteria;p__OD1;c__;o__;f__
344	0.46021	0.00440243		0.281966	0.0825264	0.846419	0.222968	0.31121	0.108537	142	k__Bacteria;p__Bacteroidetes;c__Bacteroidia;o__Bacteroidales;f__Rikenellaceae
345	0.461662	0.00441523		0.650462	0.117578	0.0267487	0.159401	0.0391623	0.0849468	196	k__Bacteria;p__Chloroflexi;c__Anaerolineae;o__SB-34;f__
346	0.462198	0.00442803		0.000497414	0.225016	0.424135	0.527161	0.0425976	0.423119	505	k__Bacteria;p__Proteobacteria;c__Gammaproteobacteria;o__Xanthomonadales;f__Sinobacteraceae
347	0.466537	0.00444082		0.50328	0.777171	0.710088	0.787913	0.841596	0.406545	354	k__Bacteria;p__Planctomycetes;c__Phycisphaerae;o__AKAU3564;f__
348	0.467146	0.00445362		0.560434	0.119401	0.996992	0.455594	0.33365	0.104201	269	k__Bacteria;p__Firmicutes;c__AHT28;o__;f__
349	0.467146	0.00446642		0.560434	0.119401	0.996992	0.455594	0.33365	0.104201	293	k__Bacteria;p__Firmicutes;c__Clostridia;o__Clostridiales;f__Dehalobacteriaceae
350	0.467146	0.00447922		0.560434	0.119401	0.996992	0.455594	0.33365	0.104201	328	k__Bacteria;p__NC10;c__wb1-A12;o__;f__
351	0.467146	0.00449201		0.560434	0.119401	0.996992	0.455594	0.33365	0.104201	383	k__Bacteria;p__Proteobacteria;c__Alphaproteobacteria;o__Kiloniellales;f__
352	0.467146	0.00450481		0.560434	0.119401	0.996992	0.455594	0.33365	0.104201	64	k__Bacteria;p__Actinobacteria;c__Acidimicrobiia;o__Acidimicrobiales;f__wb1_P06
353	0.467146	0.00451761		0.560434	0.119401	0.996992	0.455594	0.33365	0.104201	530	k__Bacteria;p__Tenericutes;c__Mollicutes;o__Mycoplasmatales;f__Mycoplasmataceae
354	0.467146	0.00453041		0.560434	0.119401	0.996992	0.455594	0.33365	0.104201	384	k__Bacteria;p__Proteobacteria;c__Alphaproteobacteria;o__RF32;f__
355	0.468333	0.00454321		0.517691	0.614014	0.0491865	0.00729556	0.407666	0.0789508	480	k__Bacteria;p__Proteobacteria;c__Gammaproteobacteria;o__Chromatiales;f__
356	0.470144	0.004556		0.390937	0.972848	0.856535	0.657393	0.521424	0.506042	243	k__Bacteria;p__Cyanobacteria;c__4C0d-2;o__MLE1-12;f__
357	0.471077	0.0045688		0.00332654	0.602733	0.509987	0.379293	0.227982	0.515534	414	k__Bacteria;p__Proteobacteria;c__Betaproteobacteria;o__;f__
358	0.471909	0.0045816		0.923521	0.767406	0.900007	0.754668	0.266617	0.369954	56	k__Bacteria;p__Actinobacteria;c__Acidimicrobiia;o__Acidimicrobiales;f__AKIW874
359	0.479011	0.0045944		0.921398	0.642461	0.84114	0.850699	0.0352753	0.671771	550	k__Bacteria;p__Verrucomicrobia;c__[Pedosphaerae];o__[Pedosphaerales];f__[Pedosphaeraceae]
360	0.479011	0.00460719		0.921398	0.642461	0.84114	0.850699	0.0352753	0.671771	485	k__Bacteria;p__Proteobacteria;c__Gammaproteobacteria;o__HTCC2188;f__
361	0.48221	0.00461999		0.814717	0.0164161	0.828623	0.584112	0.455215	0.129427	234	k__Bacteria;p__Chloroflexi;c__TK17;o__;f__
362	0.482779	0.00463279		0.193084	0.321066	0.882567	0.149398	0.196184	0.871635	213	k__Bacteria;p__Chloroflexi;c__Chloroflexi;o__Herpetosiphonales;f__
363	0.483995	0.00464559		0.142345	0.404788	0.0025315	0.00488808	0.0105668	0.566672	75	k__Bacteria;p__Actinobacteria;c__Actinobacteria;o__Actinomycetales;f__Cryptosporangiaceae
364	0.487837	0.00465839		0.808152	0.292085	0.960962	0.595776	0.434719	0.180879	524	k__Bacteria;p__TM7;c__TM7-3;o__CW040;f__F16
365	0.491083	0.00467118		0.333564	0.00821927	0.00786597	0.0001391	0.0254551	0.674406	218	k__Bacteria;p__Chloroflexi;c__Gitt-GS-136;o__;f__
366	0.491462	0.00468398		0.0229279	0.629368	0.00133334	0.000306757	0.00375938	0.511993	554	k__Bacteria;p__Verrucomicrobia;c__[Spartobacteria];o__[Chthoniobacterales];f__[Chthoniobacteraceae]
367	0.494868	0.00469678		0.0726279	0.551494	0.486328	0.641069	0.890027	0.985162	453	k__Bacteria;p__Proteobacteria;c__Deltaproteobacteria;o__Myxococcales;f__Haliangiaceae
368	0.495355	0.00470958		4.8238e-14	0.696898	0.919827	0.241551	0.762523	0.250706	382	k__Bacteria;p__Proteobacteria;c__Alphaproteobacteria;o__Ellin329;f__
369	0.495945	0.00472237		0.270564	0.00761788	0.267187	0.0758444	0.243711	0.0516354	385	k__Bacteria;p__Proteobacteria;c__Alphaproteobacteria;o__Rhizobiales;__
370	0.499563	0.00473517		0.293249	0.131864	0.246136	0.0416733	0.0786407	0.156991	230	k__Bacteria;p__Chloroflexi;c__TK10;o__AKYG885;f__Dolo_23
371	0.500097	0.00474797		0.675466	0.947445	0.0545203	0.0698863	0.201543	0.869298	21	k__Bacteria;p__Acidobacteria;c__Acidobacteria-6;__;__
372	0.502168	0.00476077		0.554311	0.921972	0.0289182	0.0738048	0.389695	0.611157	240	k__Bacteria;p__Chloroflexi;c__Thermomicrobia;o__Sphaerobacterales;f__
373	0.506462	0.00477357		0.682484	0.189986	0.000293426	0.00370293	0.0158046	0.0575897	125	k__Bacteria;p__Armatimonadetes;c__OPB50;o__;f__
374	0.507914	0.00478636		0.481023	0.864694	0.299065	0.668129	0.776552	0.25807	37	k__Bacteria;p__Acidobacteria;c__S035;o__;f__
375	0.509043	0.00479916		0.314496	0.574485	0.0552568	0.115566	6.29115e-07	0.969172	282	k__Bacteria;p__Firmicutes;c__Bacilli;o__Lactobacillales;f__Enterococcaceae
376	0.510179	0.00481196		0.94991	0.682499	0.432989	0.457121	0.00058256	0.744765	177	k__Bacteria;p__Chlorobi;c__BSV26;o__A89;f__
377	0.512233	0.00482476		0.618402	0.253322	0.876011	0.897485	0.756842	0.442683	348	k__Bacteria;p__Planctomycetes;c__C6;o__MVS-107;f__
378	0.533377	0.00483755		0.63454	0.678343	0.149032	0.00543002	0.324878	0.556904	417	k__Bacteria;p__Proteobacteria;c__Betaproteobacteria;o__Burkholderiales;f__
379	0.534196	0.00485035		0.796419	0.509047	0.439184	0.183766	0.145331	0.954782	70	k__Bacteria;p__Actinobacteria;c__Actinobacteria;o__Actinomycetales;f__Actinosynnemataceae
380	0.537739	0.00486315		0.0705425	0.422679	0.531739	0.345673	0.616474	0.103426	553	k__Bacteria;p__Verrucomicrobia;c__[Spartobacteria];o__[Chthoniobacterales];f__01D2Z36
381	0.542532	0.00487595		0.117343	0.175286	0.356666	0.136222	0.149406	0.558649	145	k__Bacteria;p__Bacteroidetes;c__Bacteroidia;o__Bacteroidales;f__[Odoribacteraceae]
382	0.543741	0.00488874		0.513158	0.380655	0.795547	0.718526	0.733479	0.918427	137	k__Bacteria;p__Bacteroidetes;c__Bacteroidia;o__Bacteroidales;f__
383	0.552051	0.00490154		0.637195	0.100427	0.74386	0.710112	0.427868	0.224061	441	k__Bacteria;p__Proteobacteria;c__Deltaproteobacteria;o__Desulfobacterales;f__Nitrospinaceae
384	0.553035	0.00491434		0.886767	0.423735	1.15963e-07	5.39175e-07	1.37507e-12	0.851683	281	k__Bacteria;p__Firmicutes;c__Bacilli;o__Lactobacillales;f__Carnobacteriaceae
385	0.555947	0.00492714		0.646012	0.930291	0.321897	0.300752	0.31634	0.667611	186	k__Bacteria;p__Chloroflexi;c__Anaerolineae;o__A31;f__S47
386	0.557454	0.00493994		0.000367007	0.594559	0.634092	0.84227	0.116453	0.0871924	371	k__Bacteria;p__Planctomycetes;c__Planctomycetia;o__Pirellulales;f__Pirellulaceae
387	0.559793	0.00495273		0.19011	0.0173684	0.120613	0.0116404	0.442995	0.164331	4	k__Archaea;p__Crenarchaeota;c__Thaumarchaeota;o__Cenarchaeales;f__Cenarchaeaceae
388	0.567914	0.00496553		0.783023	0.152021	0.542038	0.340044	0.991525	0.182231	170	k__Bacteria;p__Chlamydiae;c__Chlamydiia;o__Chlamydiales;f__
389	0.569136	0.00497833		0.575777	0.287881	0.33868	0.161339	0.603026	0.583017	332	k__Bacteria;p__Nitrospirae;c__Nitrospira;o__Nitrospirales;f__FW
390	0.57061	0.00499113		0.605777	0.42849	0.314035	0.40162	0.435985	0.842623	461	k__Bacteria;p__Proteobacteria;c__Deltaproteobacteria;o__PB19;f__
391	0.573782	0.00500392		0.364319	0.373119	0.439334	0.588443	0.749302	0.047654	443	k__Bacteria;p__Proteobacteria;c__Deltaproteobacteria;o__Desulfuromonadales;f__Geobacteraceae
392	0.575636	0.00501672		0.145775	0.123907	0.574767	0.677422	0.47451	0.0488203	51	k__Bacteria;p__Acidobacteria;c__iii1-8;o__32-20;f__
393	0.583075	0.00502952		0.114987	0.580916	0.258356	0.0876844	0.0852069	0.434212	289	k__Bacteria;p__Firmicutes;c__Clostridia;o__Clostridiales;__
394	0.591548	0.00504232		0.122761	0.690497	0.876861	0.96812	0.301986	0.327982	132	k__Bacteria;p__BRC1;c__PRR-11;o__;f__
395	0.597531	0.00505512		0.0105486	0.620818	0.876724	0.363685	0.170269	0.649176	210	k__Bacteria;p__Chloroflexi;c__Chloroflexi;o__Chloroflexales;f__Chloroflexaceae
396	0.599141	0.00506791		0.825402	0.712785	2.87334e-09	2.02258e-08	2.56124e-15	0.540505	284	k__Bacteria;p__Firmicutes;c__Bacilli;o__Lactobacillales;f__Leuconostocaceae
397	0.599601	0.00508071		0.825189	0.721565	2.9445e-09	1.94398e-08	2.37354e-15	0.540024	2	k__Archaea;p__Crenarchaeota;c__Aigarchaeota;o__;f__
398	0.599601	0.00509351		0.825189	0.721565	2.9445e-09	1.94398e-08	2.37354e-15	0.540024	178	k__Bacteria;p__Chlorobi;c__BSV26;o__C20;f__
399	0.599601	0.00510631		0.825189	0.721565	2.9445e-09	1.94398e-08	2.37354e-15	0.540024	306	k__Bacteria;p__GAL15;c__;o__;f__
400	0.6015	0.0051191		0.830554	0.720347	3.06049e-09	2.04082e-08	2.48733e-15	0.542448	279	k__Bacteria;p__Firmicutes;c__Bacilli;o__Lactobacillales;__
401	0.606216	0.0051319		0.0743972	0.115191	0.0111454	0.306741	0.0309805	0.0255919	124	k__Bacteria;p__Armatimonadetes;c__Chthonomonadetes;o__SJA-22;f__
402	0.606306	0.0051447		0.609708	0.892719	0.560373	0.223225	0.414688	0.262839	418	k__Bacteria;p__Proteobacteria;c__Betaproteobacteria;o__Burkholderiales;f__Alcaligenaceae
403	0.616378	0.0051575		0.633874	0.200175	0.735792	0.66603	0.933067	0.281923	502	k__Bacteria;p__Proteobacteria;c__Gammaproteobacteria;o__Thiohalorhabdales;f__
404	0.618051	0.0051703		0.519253	0.292388	6.23803e-07	6.04612e-05	2.78373e-08	0.153351	35	k__Bacteria;p__Acidobacteria;c__PAUC37f;o__;f__
405	0.620737	0.00518309		0.299133	0.397156	0.689513	0.490995	0.90051	0.0910537	489	k__Bacteria;p__Proteobacteria;c__Gammaproteobacteria;o__Legionellales;f__Coxiellaceae
406	0.627659	0.00519589		0.596293	0.312659	0.871517	0.403155	0.665965	0.438495	62	k__Bacteria;p__Actinobacteria;c__Acidimicrobiia;o__Acidimicrobiales;f__Microthrixaceae
407	0.62809	0.00520869		0.00220305	0.292112	0.224643	0.394462	0.680026	0.263186	119	k__Bacteria;p__Actinobacteria;c__Thermoleophilia;o__Solirubrobacterales;f__Patulibacteraceae
408	0.632484	0.00522149		0.0313975	0.94838	0.243484	0.513597	0.193639	0.499359	521	k__Bacteria;p__TM7;c__TM7-1;o__;f__
409	0.635792	0.00523428		0.0987733	0.555573	0.735063	0.617352	0.313449	0.59631	308	k__Bacteria;p__GN02;c__GKS2-174;o__;f__
410	0.641353	0.00524708		0.521368	0.588354	0.47581	0.31032	0.532898	0.281446	488	k__Bacteria;p__Proteobacteria;c__Gammaproteobacteria;o__Legionellales;f__
411	0.647309	0.00525988		0.0645393	0.193539	0.319449	0.0657412	0.533635	0.784477	288	k__Bacteria;p__Firmicutes;c__Clostridia;o__;f__
412	0.6592	0.00527268		0.24643	0.720195	0.507158	0.863529	0.819589	0.311157	127	k__Bacteria;p__Armatimonadetes;c__SJA-176;o__GAB-B06;f__
413	0.660775	0.00528548		0.500469	0.383563	0.0234828	0.0125849	0.293261	0.00975067	492	k__Bacteria;p__Proteobacteria;c__Gammaproteobacteria;o__Methylococcales;f__
414	0.664448	0.00529827		0.0305542	0.529342	0.691113	0.788623	0.602789	0.287077	330	k__Bacteria;p__NKB19;c__TSBW08;o__;f__
415	0.665455	0.00531107		0.379035	0.713658	0.695256	0.4852	0.432229	0.669138	456	k__Bacteria;p__Proteobacteria;c__Deltaproteobacteria;o__Myxococcales;f__OM27
416	0.666077	0.00532387		0.522229	0.721748	0.672603	0.491788	0.209028	0.900732	136	k__Bacteria;p__Bacteroidetes;c__Bacteroidia;o__Bacteroidales;__
417	0.667292	0.00533667		0.341023	0.0303286	0.788015	0.695719	0.256311	0.691603	351	k__Bacteria;p__Planctomycetes;c__OM190;o__CL500-15;f__
418	0.669074	0.00534946		0.891231	0.969411	2.76731e-07	1.14807e-06	1.27902e-16	0.771997	3	k__Archaea;p__Crenarchaeota;c__MBGA;o__;f__
419	0.671272	0.00536226		0.620878	0.696967	0.468296	0.991839	0.449083	0.0886804	1	Unassigned;__;__;__;__
420	0.671584	0.00537506		0.625255	0.296346	0.745399	0.665205	0.962809	0.290893	544	k__Bacteria;p__Verrucomicrobia;c__[Pedosphaerae];o__;f__
421	0.671584	0.00538786		0.625255	0.296346	0.745399	0.665205	0.962809	0.290893	18	k__Bacteria;p__Acidobacteria;c__AT-s2-57;o__;f__
422	0.671584	0.00540066		0.625255	0.296346	0.745399	0.665205	0.962809	0.290893	355	k__Bacteria;p__Planctomycetes;c__Phycisphaerae;o__CCM11a;f__
423	0.671584	0.00541345		0.625255	0.296346	0.745399	0.665205	0.962809	0.290893	538	k__Bacteria;p__Verrucomicrobia;c__Opitutae;o__Puniceicoccales;f__Puniceicoccaceae
424	0.676048	0.00542625		0.33694	0.935706	0.52839	0.950841	0.804311	0.353785	112	k__Bacteria;p__Actinobacteria;c__Thermoleophilia;o__;f__
425	0.682479	0.00543905		0.772994	0.448557	0.855259	0.989099	0.780319	0.659375	123	k__Bacteria;p__Armatimonadetes;c__Chthonomonadetes;o__Chthonomonadales;f__Chthonomonadaceae
426	0.689474	0.00545185		0.355264	0.541316	0.0202204	0.233022	0.000306559	0.162201	331	k__Bacteria;p__Nitrospirae;c__Nitrospira;o__Nitrospirales;f__0319-6A21
427	0.689849	0.00546464		0.0072827	0.946517	0.14373	0.0450432	0.0275408	0.120784	188	k__Bacteria;p__Chloroflexi;c__Anaerolineae;o__Ardenscatenales;f__Ardenscatenaceae
428	0.696005	0.00547744		0.728399	0.00911235	0.47932	0.00723737	0.299717	3.71487e-05	128	k__Bacteria;p__Armatimonadetes;c__SJA-176;o__RB046;f__
429	0.720269	0.00549024		0.0520748	0.144978	0.921338	0.761293	0.516796	0.00674667	68	k__Bacteria;p__Actinobacteria;c__Actinobacteria;o__Actinomycetales;f__
430	0.727972	0.00550304		0.749105	0.928584	9.54489e-07	6.48409e-06	0.0021568	0.823301	129	k__Bacteria;p__Armatimonadetes;c__[Fimbriimonadia];o__[Fimbriimonadales];f__[Fimbriimonadaceae]
431	0.728083	0.00551584		0.52465	0.687998	0.00785839	0.000169714	0.337659	0.178594	359	k__Bacteria;p__Planctomycetes;c__Phycisphaerae;o__Phycisphaerales;f__Phycisphaeraceae
432	0.729136	0.00552863		0.828974	0.120315	0.640822	0.944907	0.640396	0.85444	61	k__Bacteria;p__Actinobacteria;c__Acidimicrobiia;o__Acidimicrobiales;f__JdFBGBact
433	0.73335	0.00554143		0.516854	0.255231	0.340136	0.189773	0.730448	0.365536	172	k__Bacteria;p__Chlamydiae;c__Chlamydiia;o__Chlamydiales;f__Rhabdochlamydiaceae
434	0.744702	0.00555423		0.715655	0.613355	0.665451	0.920158	0.729117	0.719474	325	k__Bacteria;p__Kazan-3B-28;c__;o__;f__
435	0.745338	0.00556703		0.839325	0.460424	0.86345	0.569908	0.580655	0.896036	130	k__Bacteria;p__BHI80-139;c__;o__;f__
436	0.74887	0.00557982		0.112484	0.815279	0.683329	0.8494	0.394784	0.448466	277	k__Bacteria;p__Firmicutes;c__Bacilli;o__Bacillales;f__Thermoactinomycetaceae
437	0.750776	0.00559262		0.00928851	0.766323	0.0332033	0.0290699	0.886439	0.67425	116	k__Bacteria;p__Actinobacteria;c__Thermoleophilia;o__Solirubrobacterales;__
438	0.754514	0.00560542		0.396148	0.0440383	0.163929	0.57324	0.777522	0.144328	102	k__Bacteria;p__Actinobacteria;c__Actinobacteria;o__Actinomycetales;f__Yaniellaceae
439	0.756149	0.00561822		0.580145	0.466351	0.197206	0.118012	0.821024	0.118575	323	k__Bacteria;p__Gemmatimonadetes;c__Gemmatimonadetes;o__KD8-87;f__
440	0.757008	0.00563102		0.542919	0.498256	4.29447e-06	4.98767e-05	1.01253e-07	0.728705	500	k__Bacteria;p__Proteobacteria;c__Gammaproteobacteria;o__Pseudomonadales;f__Pseudomonadaceae
441	0.758935	0.00564381		0.575621	0.567428	0.103311	0.0781533	0.521694	0.0298591	153	k__Bacteria;p__Bacteroidetes;c__Flavobacteriia;o__Flavobacteriales;__
442	0.759388	0.00565661		0.431939	0.212669	0.757982	0.872887	0.866567	0.43562	10	k__Archaea;p__Euryarchaeota;c__Thermoplasmata;o__E2;__
443	0.7611	0.00566941		0.0329653	0.507877	0.00246101	0.194328	0.000144531	0.00563107	107	k__Bacteria;p__Actinobacteria;c__MB-A2-108;o__;f__
444	0.765186	0.00568221		0.702503	0.722523	0.339794	0.341409	0.973918	0.17648	173	k__Bacteria;p__Chlamydiae;c__Chlamydiia;o__Chlamydiales;f__Simkaniaceae
445	0.768286	0.005695		0.571907	0.735949	0.731406	0.790695	0.738098	0.932119	339	k__Bacteria;p__OP11;c__OP11-3;o__;f__
446	0.768934	0.0057078		0.510168	0.271089	0.824959	0.823426	0.742037	0.122757	431	k__Bacteria;p__Proteobacteria;c__Betaproteobacteria;o__Procabacteriales;f__Procabacteriaceae
447	0.769196	0.0057206		0.326519	0.347794	0.780449	0.680021	0.383178	0.819231	408	k__Bacteria;p__Proteobacteria;c__Alphaproteobacteria;o__Rickettsiales;f__mitochondria
448	0.777541	0.0057334		0.425086	0.415448	0.0122866	0.0796594	0.291006	0.570018	241	k__Bacteria;p__Chloroflexi;c__[Thermobacula];o__[Thermobaculales];f__[Thermobaculaceae]
449	0.780997	0.00574619		1.14783e-09	0.0111825	0.000937589	2.64162e-05	0.00403256	0.0347276	273	k__Bacteria;p__Firmicutes;c__Bacilli;o__Bacillales;f__Bacillaceae
450	0.781618	0.00575899		0.999096	0.11767	0.184649	0.85629	0.30317	0.0942645	199	k__Bacteria;p__Chloroflexi;c__Anaerolineae;o__SBR1031;f__SJA-101
451	0.788338	0.00577179		0.320777	0.189755	0.486504	0.608739	0.756253	0.314674	341	k__Bacteria;p__OP3;c__PBS-25;o__;f__
452	0.788725	0.00578459		0.437819	0.418009	0.0177947	0.052309	0.154132	0.27777	211	k__Bacteria;p__Chloroflexi;c__Chloroflexi;o__Chloroflexales;f__FFCH7168
453	0.788809	0.00579739		0.716356	0.666775	7.94826e-05	0.000271773	1.02011e-07	0.76715	360	k__Bacteria;p__Planctomycetes;c__Phycisphaerae;o__Pla1;f__
454	0.793712	0.00581018		0.0718785	0.214913	0.569997	0.47776	0.784763	0.0850105	85	k__Bacteria;p__Actinobacteria;c__Actinobacteria;o__Actinomycetales;f__Microbacteriaceae
455	0.796385	0.00582298		0.612679	0.647325	0.990989	0.545208	0.955733	0.877939	555	k__Bacteria;p__WPS-2;c__;o__;f__
456	0.798337	0.00583578		0.420306	0.544682	0.491713	0.117431	0.126749	0.203498	229	k__Bacteria;p__Chloroflexi;c__TK10;o__AKYG885;f__5B-12
457	0.804018	0.00584858		0.720272	0.519821	0.921424	0.767757	0.309163	0.161135	113	k__Bacteria;p__Actinobacteria;c__Thermoleophilia;o__Gaiellales;f__
458	0.804236	0.00586137		0.0199147	0.687185	0.279118	0.499716	0.176348	0.4081	185	k__Bacteria;p__Chloroflexi;c__Anaerolineae;o__;f__
459	0.809975	0.00587417		0.915264	0.267706	0.268053	0.177806	0.125984	0.774045	147	k__Bacteria;p__Bacteroidetes;c__Cytophagia;o__Cytophagales;__
460	0.812521	0.00588697		0.505057	0.836658	0.636985	0.785351	0.874418	0.71702	161	k__Bacteria;p__Bacteroidetes;c__VC2_1_Bac22;o__;f__
461	0.81267	0.00589977		0.566957	0.759446	0.830871	0.684045	0.172027	0.962615	434	k__Bacteria;p__Proteobacteria;c__Betaproteobacteria;o__Tremblayales;f__Tremblayaceae
462	0.815686	0.00591257		0.322755	0.917858	0.304703	0.34441	0.347672	0.450805	353	k__Bacteria;p__Planctomycetes;c__Phycisphaerae;__;__
463	0.815826	0.00592536		0.0556228	0.0293062	0.217744	0.924964	0.446312	0.00160481	193	k__Bacteria;p__Chloroflexi;c__Anaerolineae;o__GCA004;f__
464	0.816281	0.00593816		0.0705301	0.635358	0.0418594	0.114401	0.00124206	0.18881	523	k__Bacteria;p__TM7;c__TM7-3;o__;f__
465	0.825653	0.00595096		0.00806346	0.110714	0.828497	0.491472	0.505972	0.938787	89	k__Bacteria;p__Actinobacteria;c__Actinobacteria;o__Actinomycetales;f__Nakamurellaceae
466	0.826813	0.00596376		0.885872	0.805896	0.971363	0.971156	0.511431	0.37753	356	k__Bacteria;p__Planctomycetes;c__Phycisphaerae;o__CPla-3;f__
467	0.828241	0.00597655		0.192687	0.209223	0.786225	0.654315	0.450829	0.656515	140	k__Bacteria;p__Bacteroidetes;c__Bacteroidia;o__Bacteroidales;f__Porphyromonadaceae
468	0.833976	0.00598935		0.227524	0.828582	0.811056	0.445558	0.811864	0.405684	190	k__Bacteria;p__Chloroflexi;c__Anaerolineae;o__Caldilineales;__
469	0.837597	0.00600215		0.147783	0.827621	0.779508	0.441894	0.302773	0.985027	556	k__Bacteria;p__WS2;c__SHA-109;o__;f__
470	0.839467	0.00601495		0.119233	0.725828	0.217781	0.0510887	0.144391	0.589645	438	k__Bacteria;p__Proteobacteria;c__Deltaproteobacteria;o__Bdellovibrionales;f__Bdellovibrionaceae
471	0.841061	0.00602775		0.707035	0.556262	0.260965	0.292722	0.534594	0.819716	244	k__Bacteria;p__Cyanobacteria;c__4C0d-2;o__SM1D11;f__
472	0.841891	0.00604054		0.000598957	0.292468	0.983535	0.801375	0.510477	0.27813	309	k__Bacteria;p__GOUTA4;c__;o__;f__
473	0.842143	0.00605334		5.80245e-16	0.776668	0.280123	0.764986	0.264828	0.543606	28	k__Bacteria;p__Acidobacteria;c__Acidobacteriia;o__Acidobacteriales;f__Acidobacteriaceae
474	0.842836	0.00606614		0.121271	0.539616	0.239199	0.458456	0.885401	0.241105	446	k__Bacteria;p__Proteobacteria;c__Deltaproteobacteria;o__GMD14H09;f__
475	0.845708	0.00607894		0.816297	0.833255	0.755437	0.679886	0.755216	0.12872	344	k__Bacteria;p__Planctomycetes;__;__;__
476	0.851747	0.00609173		0.252648	0.123613	0.621511	0.317784	0.130316	0.231357	105	k__Bacteria;p__Actinobacteria;c__Coriobacteriia;o__Coriobacteriales;f__Coriobacteriaceae
477	0.852082	0.00610453		0.00606208	0.25194	0.132039	0.265153	0.550784	0.119632	77	k__Bacteria;p__Actinobacteria;c__Actinobacteria;o__Actinomycetales;f__Dermacoccaceae
478	0.858642	0.00611733		0.13164	0.223553	0.178494	0.8111	0.763089	0.0154618	226	k__Bacteria;p__Chloroflexi;c__TK10;__;__
479	0.866236	0.00613013		0.124705	0.36792	0.581258	0.685488	0.659612	0.0822169	59	k__Bacteria;p__Actinobacteria;c__Acidimicrobiia;o__Acidimicrobiales;f__EB1017
480	0.866254	0.00614293		0.432008	0.750229	0.117083	0.0139497	0.256535	0.188532	482	k__Bacteria;p__Proteobacteria;c__Gammaproteobacteria;o__Chromatiales;f__Ectothiorhodospiraceae
481	0.868807	0.00615572		0.774953	0.750466	0.121869	0.546073	0.434179	0.200627	518	k__Bacteria;p__TM7;c__;o__;f__
482	0.871011	0.00616852		0.400557	0.876399	0.460314	0.452414	0.27733	0.575068	262	k__Bacteria;p__Elusimicrobia;c__Elusimicrobia;o__FAC88;f__
483	0.873098	0.00618132		0.582687	0.937509	0.0260668	0.100773	0.111126	0.0977979	536	k__Bacteria;p__Verrucomicrobia;c__Opitutae;o__HA64;f__
484	0.875206	0.00619412		0.492085	0.337371	0.64017	0.743645	0.563283	0.400637	366	k__Bacteria;p__Planctomycetes;c__Planctomycetia;__;__
485	0.878193	0.00620691		0.470151	0.255031	2.59696e-08	1.45314e-05	5.86819e-05	0.0428861	397	k__Bacteria;p__Proteobacteria;c__Alphaproteobacteria;o__Rhizobiales;f__Xanthobacteraceae
486	0.881374	0.00621971		0.76597	0.965083	0.213586	0.079788	0.94895	0.0298463	300	k__Bacteria;p__Firmicutes;c__Clostridia;o__Clostridiales;f__Veillonellaceae
487	0.887388	0.00623251		0.43494	0.735179	0.000334368	0.00253967	1.61534e-06	0.629411	450	k__Bacteria;p__Proteobacteria;c__Deltaproteobacteria;o__Myxococcales;f__0319-6G20
488	0.892062	0.00624531		0.566115	0.99817	0.972105	0.360162	0.396261	0.969319	445	k__Bacteria;p__Proteobacteria;c__Deltaproteobacteria;o__FAC87;f__
489	0.898612	0.00625811		0.0770938	0.501209	0.291103	0.114551	0.57814	0.815987	283	k__Bacteria;p__Firmicutes;c__Bacilli;o__Lactobacillales;f__Lactobacillaceae
490	0.902403	0.0062709		0.0973357	0.267083	0.850529	0.305031	0.769227	0.233175	470	k__Bacteria;p__Proteobacteria;c__Gammaproteobacteria;o__Alteromonadales;__
491	0.903365	0.0062837		0.672724	0.404434	0.716881	0.959164	0.266556	0.447638	487	k__Bacteria;p__Proteobacteria;c__Gammaproteobacteria;o__Legionellales;__
492	0.908087	0.0062965		0.715579	0.865718	0.470206	0.465182	0.915075	0.148027	476	k__Bacteria;p__Proteobacteria;c__Gammaproteobacteria;o__Alteromonadales;f__J115
493	0.908382	0.0063093		0.400938	0.47324	0.00297341	0.00127016	0.0440489	0.273761	324	k__Bacteria;p__Gemmatimonadetes;c__Gemmatimonadetes;o__N1423WL;f__
494	0.910208	0.00632209		0.650891	0.504767	0.923879	0.912318	0.650334	0.937188	533	k__Bacteria;p__Verrucomicrobia;__;__;__
495	0.911325	0.00633489		0.117571	0.432142	0.211461	0.00642721	0.309909	0.640358	545	k__Bacteria;p__Verrucomicrobia;c__[Pedosphaerae];o__[Pedosphaerales];__
496	0.912185	0.00634769		0.387402	0.330428	0.00851199	0.116925	0.14757	0.182529	206	k__Bacteria;p__Chloroflexi;c__Chloroflexi;__;__
497	0.912185	0.00636049		0.387402	0.330428	0.00851199	0.116925	0.14757	0.182529	259	k__Bacteria;p__Cyanobacteria;c__Synechococcophycideae;o__Pseudanabaenales;f__Pseudanabaenaceae
498	0.912185	0.00637329		0.387402	0.330428	0.00851199	0.116925	0.14757	0.182529	406	k__Bacteria;p__Proteobacteria;c__Alphaproteobacteria;o__Rickettsiales;f__Holosporaceae
499	0.914772	0.00638608		0.317228	0.19629	0.999881	0.575958	0.361541	0.55061	484	k__Bacteria;p__Proteobacteria;c__Gammaproteobacteria;o__HOC36;f__
500	0.917279	0.00639888		0.63648	0.541043	0.112015	0.0800474	0.460968	0.0698296	13	k__Archaea;p__[Parvarchaeota];c__[Parvarchaea];o__WCHD3-30;f__
501	0.917279	0.00641168		0.63648	0.541043	0.112015	0.0800474	0.460968	0.0698296	184	k__Bacteria;p__Chloroflexi;c__Anaerolineae;__;__
502	0.917279	0.00642448		0.63648	0.541043	0.112015	0.0800474	0.460968	0.0698296	491	k__Bacteria;p__Proteobacteria;c__Gammaproteobacteria;o__Methylococcales;__
503	0.921546	0.00643727		0.0140765	0.366864	0.241207	0.440686	0.615312	0.172792	164	k__Bacteria;p__Bacteroidetes;c__[Saprospirae];o__[Saprospirales];__
504	0.927834	0.00645007		0.807903	0.792835	0.583755	0.542877	0.952544	0.231757	519	k__Bacteria;p__TM7;c__MJK10;o__;f__
505	0.933936	0.00646287		0.910031	0.687246	0.74196	0.511273	0.732658	0.372882	57	k__Bacteria;p__Actinobacteria;c__Acidimicrobiia;o__Acidimicrobiales;f__Acidimicrobiaceae
506	0.937063	0.00647567		0.580511	0.817464	0.959841	0.173308	0.283282	0.0786021	203	k__Bacteria;p__Chloroflexi;c__Anaerolineae;o__envOPS12;f__
507	0.938277	0.00648847		0.713106	0.75375	0.076152	0.0506407	0.0622513	0.695677	182	k__Bacteria;p__Chloroflexi;__;__;__
508	0.939242	0.00650126		0.0507404	0.132969	0.830532	0.539449	0.805115	0.716691	181	k__Bacteria;p__Chlorobi;c__SJA-28;o__;f__
509	0.945966	0.00651406		0.232518	0.752355	0.414977	0.263422	0.772319	0.669381	302	k__Bacteria;p__Firmicutes;c__Clostridia;o__Clostridiales;f__[Tissierellaceae]
510	0.954611	0.00652686		0.945077	0.171117	0.471027	0.979711	0.606121	0.0825861	335	k__Bacteria;p__OD1;c__ABY1;o__;f__
511	0.955883	0.00653966		9.00291e-08	0.498602	0.793975	0.827991	0.52335	0.890594	415	k__Bacteria;p__Proteobacteria;c__Betaproteobacteria;o__A21b;f__EB1003
512	0.955883	0.00655245		9.00291e-08	0.498602	0.793975	0.827991	0.52335	0.890594	522	k__Bacteria;p__TM7;c__TM7-3;__;__
513	0.957609	0.00656525		0.143319	0.574855	0.425423	0.916748	0.365482	0.829348	318	k__Bacteria;p__Gemmatimonadetes;c__Gemmatimonadetes;o__C114;f__
514	0.959342	0.00657805		0.799906	0.87849	0.546053	0.508765	0.901006	0.166486	495	k__Bacteria;p__Proteobacteria;c__Gammaproteobacteria;o__Oceanospirillales;f__Alcanivoracaceae
515	0.960913	0.00659085		0.357011	0.933492	0.375698	0.239272	0.688886	0.74917	429	k__Bacteria;p__Proteobacteria;c__Betaproteobacteria;o__Neisseriales;f__Neisseriaceae
516	0.962332	0.00660364		0.696555	0.472597	0.400569	0.433389	0.984241	0.132705	478	k__Bacteria;p__Proteobacteria;c__Gammaproteobacteria;o__Alteromonadales;f__[Chromatiaceae]
517	0.963329	0.00661644		0.614784	0.664525	0.65153	0.635655	0.952079	0.203339	350	k__Bacteria;p__Planctomycetes;c__OM190;o__;f__
518	0.964249	0.00662924		0.358293	0.473848	0.78355	0.732415	0.73839	0.489938	373	k__Bacteria;p__Planctomycetes;c__vadinHA49;o__DH61;f__
519	0.964862	0.00664204		0.349949	0.132613	0.554893	0.299414	0.315759	0.546263	53	k__Bacteria;p__Actinobacteria;__;__;__
520	0.965561	0.00665484		0.496085	0.829341	0.568668	0.92003	0.792782	0.412207	349	k__Bacteria;p__Planctomycetes;c__C6;o__d113;f__
521	0.967964	0.00666763		0.920995	0.0871417	0.943618	0.594223	0.696058	0.833048	514	k__Bacteria;p__TM6;__;__;__
522	0.970707	0.00668043		0.774092	0.894032	0.569457	0.565084	0.933055	0.254506	471	k__Bacteria;p__Proteobacteria;c__Gammaproteobacteria;o__Alteromonadales;f__
523	0.970707	0.00669323		0.774092	0.894032	0.569457	0.565084	0.933055	0.254506	494	k__Bacteria;p__Proteobacteria;c__Gammaproteobacteria;o__Oceanospirillales;f__
524	0.970882	0.00670603		0.809955	0.808247	0.638299	0.511044	0.936257	0.858754	168	k__Bacteria;p__Chlamydiae;c__Chlamydiia;__;__
525	0.970882	0.00671882		0.809955	0.808247	0.638299	0.511044	0.936257	0.858754	268	k__Bacteria;p__Firmicutes;__;__;__
526	0.971256	0.00673162		0.178082	0.609616	0.762851	0.761234	0.852821	0.676166	249	k__Bacteria;p__Cyanobacteria;c__Chloroplast;o__Chlorophyta;f__
527	0.972582	0.00674442		0.533834	0.814958	0.161639	0.164783	0.653745	0.808266	65	k__Bacteria;p__Actinobacteria;c__Actinobacteria;__;__
528	0.973404	0.00675722		0.778592	0.924609	0.579936	0.572206	0.938055	0.235608	475	k__Bacteria;p__Proteobacteria;c__Gammaproteobacteria;o__Alteromonadales;f__Idiomarinaceae
529	0.973911	0.00677002		0.850327	0.291843	0.750069	0.874027	0.920586	0.644314	361	k__Bacteria;p__Planctomycetes;c__Phycisphaerae;o__SHUX583;f__
530	0.974192	0.00678281		0.045298	0.35756	0.223281	0.00945552	0.447166	0.780249	467	k__Bacteria;p__Proteobacteria;c__Gammaproteobacteria;o__34P16;f__
531	0.974722	0.00679561		0.0230672	0.366633	0.582917	0.300544	0.377209	0.000797314	16	k__Bacteria;p__;c__;o__;f__
532	0.977389	0.00680841		2.10697e-05	0.48153	0.97065	0.656708	0.153835	0.947511	526	k__Bacteria;p__TM7;c__TM7-3;o__I025;f__
533	0.977657	0.00682121		0.621072	0.812404	0.643073	0.908289	0.802683	0.561634	135	k__Bacteria;p__Bacteroidetes;c__BME43;o__;f__
534	0.977657	0.006834		0.621072	0.812404	0.643073	0.908289	0.802683	0.561634	493	k__Bacteria;p__Proteobacteria;c__Gammaproteobacteria;o__Methylococcales;f__Methylococcaceae
535	0.981957	0.0068468		0.877083	0.896473	0.722138	0.818617	0.932524	0.377794	24	k__Bacteria;p__Acidobacteria;c__Acidobacteria-6;o__iii1-15;__
536	0.981957	0.0068596		0.877083	0.896473	0.722138	0.818617	0.932524	0.377794	496	k__Bacteria;p__Proteobacteria;c__Gammaproteobacteria;o__Oceanospirillales;f__Hahellaceae
537	0.987397	0.0068724		0.185469	0.569778	0.942727	0.0789634	0.649252	2.25503e-08	40	k__Bacteria;p__Acidobacteria;c__Solibacteres;o__Solibacterales;f__AKIW659
538	0.988076	0.0068852		0.263679	0.744371	0.422544	0.207201	0.563266	0.948345	304	k__Bacteria;p__Firmicutes;c__Erysipelotrichi;o__Erysipelotrichales;f__Erysipelotrichaceae
539	0.988109	0.00689799		0.666142	0.761113	0.619544	0.925206	0.810187	0.775851	512	k__Bacteria;p__SR1;c__;o__;f__
540	0.988109	0.00691079		0.666142	0.761113	0.619544	0.925206	0.810187	0.775851	515	k__Bacteria;p__TM6;c__F38;o__;f__
541	0.988427	0.00692359		0.466011	0.895208	0.962449	0.648456	0.739403	0.608648	343	k__Bacteria;p__OP3;c__koll11;o__GIF10;f__kpj58rc
542	0.989546	0.00693639		0.00205671	0.753282	0.434438	0.335238	0.548005	0.000264715	204	k__Bacteria;p__Chloroflexi;c__Anaerolineae;o__pLW-97;f__
543	0.991738	0.00694918		0.134173	0.600818	0.209704	0.0112569	0.360843	0.43127	305	k__Bacteria;p__Fusobacteria;c__Fusobacteriia;o__Fusobacteriales;f__
544	0.991796	0.00696198		0.239853	0.49698	0.495521	0.789157	0.97837	0.504701	513	k__Bacteria;p__Spirochaetes;c__Spirochaetes;o__Spirochaetales;f__Spirochaetaceae
545	0.991796	0.00697478		0.239853	0.49698	0.495521	0.789157	0.97837	0.504701	532	k__Bacteria;p__Tenericutes;c__RF3;o__ML615J-28;f__
546	0.991927	0.00698758		0.503374	0.0385961	0.601726	0.452958	0.369423	0.0838526	223	k__Bacteria;p__Chloroflexi;c__S085;o__;f__
547	0.992148	0.00700038		0.137922	0.982777	0.994362	0.844509	0.864498	0.895864	157	k__Bacteria;p__Bacteroidetes;c__Flavobacteriia;o__Flavobacteriales;f__[Weeksellaceae]
548	0.993408	0.00701317		0.418568	0.693607	0.649678	0.537909	0.575024	0.0551611	36	k__Bacteria;p__Acidobacteria;c__RB25;o__;f__
549	0.993976	0.00702597		0.519435	0.953456	0.535534	0.410462	0.779459	0.823047	34	k__Bacteria;p__Acidobacteria;c__DA052;o__Ellin6513;f__
550	0.993976	0.00703877		0.519435	0.953456	0.535534	0.410462	0.779459	0.823047	528	k__Bacteria;p__Tenericutes;c__Mollicutes;o__Acholeplasmatales;f__Acholeplasmataceae
551	0.994019	0.00705157		0.679071	0.475753	0.820633	0.844946	0.825312	0.323381	38	k__Bacteria;p__Acidobacteria;c__Solibacteres;o__Solibacterales;__
552	0.994019	0.00706436		0.679071	0.475753	0.820633	0.844946	0.825312	0.323381	247	k__Bacteria;p__Cyanobacteria;c__Chloroplast;__;__
553	0.997485	0.00707716		0.993995	0.628532	0.795683	0.850639	0.796814	0.984279	368	k__Bacteria;p__Planctomycetes;c__Planctomycetia;o__Gemmatales;__
554	0.997485	0.00708996		0.993995	0.628532	0.795683	0.850639	0.796814	0.984279	380	k__Bacteria;p__Proteobacteria;c__Alphaproteobacteria;o__Caulobacterales;__
555	0.997485	0.00710276		0.993995	0.628532	0.795683	0.850639	0.796814	0.984279	465	k__Bacteria;p__Proteobacteria;c__Epsilonproteobacteria;o__Campylobacterales;f__Helicobacteraceae
556	0.997827	0.00711556		0.0230542	0.563374	0.380728	0.444403	0.504697	0.00439175	551	k__Bacteria;p__Verrucomicrobia;c__[Pedosphaerae];o__[Pedosphaerales];f__auto67_4W
557	0.997872	0.00712835		0.0051774	0.821102	0.447162	0.429281	0.544126	0.000601679	202	k__Bacteria;p__Chloroflexi;c__Anaerolineae;o__WCHB1-50;f__
558	0.998424	0.00714115		0.0709813	0.807917	0.609525	0.525605	0.664981	0.0148631	209	k__Bacteria;p__Chloroflexi;c__Chloroflexi;o__Chloroflexales;f__01D2Z48
559	0.998424	0.00715395		0.0709813	0.807917	0.609525	0.525605	0.664981	0.0148631	365	k__Bacteria;p__Planctomycetes;c__Pla4;o__;f__
560	0.998424	0.00716675		0.0709813	0.807917	0.609525	0.525605	0.664981	0.0148631	539	k__Bacteria;p__Verrucomicrobia;c__Opitutae;o__[Cerasicoccales];f__[Cerasicoccaceae]
561	0.99845	0.00717954		0.850746	0.229584	0.89819	0.905594	0.676319	0.777651	252	k__Bacteria;p__Cyanobacteria;c__Chloroplast;o__Streptophyta;f__
562	0.998571	0.00719234		0.897953	0.533623	0.827615	0.739151	0.710867	0.532983	256	k__Bacteria;p__Cyanobacteria;c__Oscillatoriophycideae;o__Chroococcales;f__Xenococcaceae
563	0.999542	0.00720514		0.0224097	0.457115	0.271341	0.549901	0.800778	0.00243273	106	k__Bacteria;p__Actinobacteria;c__MB-A2-108;o__0319-7L14;f__
564	NA	0.00721794		NA	NA	NA	NA	NA	NA	44	k__Bacteria;p__Acidobacteria;c__Solibacteres;o__Solibacterales;f__[Bryobacteraceae]
565	NA	0.00723074		NA	NA	NA	NA	NA	NA	66	k__Bacteria;p__Actinobacteria;c__Actinobacteria;o__;f__
